# Supplementary material for: Systematic Analysis of the Associations between Adverse Drug Reactions and Pathways
Source: Hindawi journal article supplement (doi:10.1155/2015/670949), 2015-01-01
Supplement: f1 [file 670949.f1.pdf]

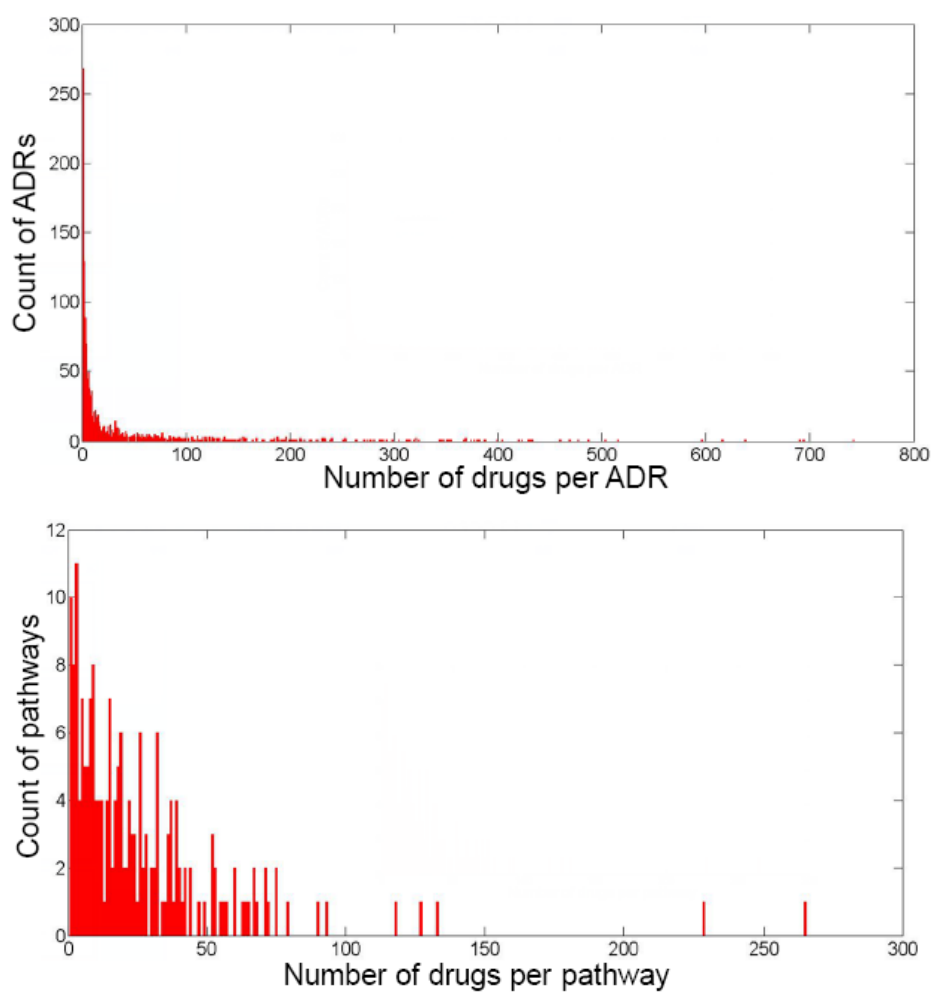

Figure S1. Statistics of the drug-ADR relations and the drug-pathway relations

Dataset S1. The ADR-pathway network

| pathway code | pathway name                 | ADR                          |
|--------------|------------------------------|------------------------------|
| path:00140   | Steroid hormone biosynthesis | myocardial infarction        |
| path:00140   | Steroid hormone biosynthesis | tumor                        |
| path:00140   | Steroid hormone biosynthesis | thrombophlebitis             |
| path:00140   | Steroid hormone biosynthesis | breast pain                  |
| path:00140   | Steroid hormone biosynthesis | laryngitis                   |
| path:00140   | Steroid hormone biosynthesis | pulmonary embolism           |
| path:00140   | Steroid hormone biosynthesis | urinary frequency            |
| path:00230   | Purine metabolism            | seizures                     |
| path:00230   | Purine metabolism            | supraventricular tachycardia |
| path:00232   | Caffeine metabolism          | tremor                       |
| path:00232   | Caffeine metabolism          | coma                         |
| path:00232   | Caffeine metabolism          | ataxia                       |
| path:00232   | Caffeine metabolism          | diplopia                     |
| path:00240   | Pyrimidine metabolism        | leukopenia                   |
| path:00240   | Pyrimidine metabolism        | constitutional symptoms      |
| path:00240   | Pyrimidine metabolism        | hypersensitivity             |
| path:00240   | Pyrimidine metabolism        | anorexia                     |
| path:00240   | Pyrimidine metabolism        | anemia                       |
| path:00240   | Pyrimidine metabolism        | pain                         |
| path:00240   | Pyrimidine metabolism        | neutropenia                  |
| path:00240   | Pyrimidine metabolism        | alopecia                     |
| path:00240   | Pyrimidine metabolism        | stomatitis                   |
| path:00240   | Pyrimidine metabolism        | myalgia                      |
| path:00240   | Pyrimidine metabolism        | infection                    |
| path:00240   | Pyrimidine metabolism        | diarrhea                     |
| path:00240   | Pyrimidine metabolism        | dyspnea                      |
| path:00240   | Pyrimidine metabolism        | thrombocytopenia             |
| path:00380   | Tryptophan metabolism        | impotence                    |
| path:00380   | Tryptophan metabolism        | shock                        |
| path:00590   | Arachidonic acid metabolism  | gastrointestinal hemorrhage  |
| path:00590   | Arachidonic acid metabolism  | glossitis                    |
| path:00590   | Arachidonic acid metabolism  | erythema multiforme          |
| path:00590   | Arachidonic acid metabolism  | elevated liver enzymes       |
| path:00590   | Arachidonic acid metabolism  | hematemesis                  |
| path:00590   | Arachidonic acid metabolism  | ulcerative stomatitis        |
| path:00590   | Arachidonic acid metabolism  | eructation                   |
| path:00590   | Arachidonic acid metabolism  | gastritis                    |
| path:00590   | Arachidonic acid metabolism  | dysuria                      |
| path:00590   | Arachidonic acid metabolism  | hearing loss                 |
| path:00590   | Arachidonic acid metabolism  | heartburn                    |
| path:00590   | Arachidonic acid metabolism  | exfoliative dermatitis       |
| path:00590   | Arachidonic acid metabolism  | ecchymosis                   |
| path:00590   | Arachidonic acid metabolism  | pancreatitis                 |
| path:00590   | Arachidonic acid metabolism  | stomatitis                   |
| path:00590   | Arachidonic acid metabolism  | Stevens – Johnson syndrome   |
| path:00590   | Arachidonic acid metabolism  | sepsis                       |
| path:00590   | Arachidonic acid metabolism  | rectal hemorrhage            |
| path:00590   | Arachidonic acid metabolism  | proteinuria                  |
| path:00590   | Arachidonic acid metabolism  | peptic ulcer                 |
| path:00590   | Arachidonic acid metabolism  | interstitial nephritis       |
| path:00590   | Arachidonic acid metabolism  | pancytopenia                 |
| path:00590   | Arachidonic acid metabolism  | hematuria                    |
| path:00590   | Arachidonic acid metabolism  | melen                        |
| path:00590   | Arachidonic acid metabolism  | hepatic failure              |

|            |                             |                               |
|------------|-----------------------------|-------------------------------|
| path:00590 | Arachidonic acid metabolism | jaundice                      |
| path:00590 | Arachidonic acid metabolism | toxic epidermal necrolysis    |
| path:00590 | Arachidonic acid metabolism | herpes simplex                |
| path:00590 | Arachidonic acid metabolism | hepatitis                     |
| path:00590 | Arachidonic acid metabolism | hemolytic anemia              |
| path:00590 | Arachidonic acid metabolism | pelvic pain                   |
| path:00590 | Arachidonic acid metabolism | colitis                       |
| path:00590 | Arachidonic acid metabolism | cystitis                      |
| path:00590 | Arachidonic acid metabolism | agranulocytosis               |
| path:00590 | Arachidonic acid metabolism | angioedema                    |
| path:00590 | Arachidonic acid metabolism | albuminuria                   |
| path:00590 | Arachidonic acid metabolism | aplastic anemia               |
| path:00590 | Arachidonic acid metabolism | congestive heart failure      |
| path:00590 | Arachidonic acid metabolism | asthma                        |
| path:00591 | Linoleic acid metabolism    | breast pain                   |
| path:00591 | Linoleic acid metabolism    | menorrhagia                   |
| path:00591 | Linoleic acid metabolism    | migraine                      |
| path:00591 | Linoleic acid metabolism    | ataxia                        |
| path:00591 | Linoleic acid metabolism    | myocardial infarction         |
| path:00591 | Linoleic acid metabolism    | liver function tests abnormal |
| path:00591 | Linoleic acid metabolism    | neck rigidity                 |
| path:00591 | Linoleic acid metabolism    | nervousness                   |
| path:00591 | Linoleic acid metabolism    | tenesmus                      |
| path:00591 | Linoleic acid metabolism    | neurosis                      |
| path:00591 | Linoleic acid metabolism    | lymphadenopathy               |
| path:00591 | Linoleic acid metabolism    | otitis media                  |
| path:00591 | Linoleic acid metabolism    | leukopenia                    |
| path:00591 | Linoleic acid metabolism    | laryngitis                    |
| path:00591 | Linoleic acid metabolism    | carcinoma                     |
| path:00591 | Linoleic acid metabolism    | hemorrhoids                   |
| path:00591 | Linoleic acid metabolism    | tinnitus                      |
| path:00591 | Linoleic acid metabolism    | Dyspepsia                     |
| path:00591 | Linoleic acid metabolism    | jaundice                      |
| path:00591 | Linoleic acid metabolism    | interstitial nephritis        |
| path:00591 | Linoleic acid metabolism    | colitis                       |
| path:00591 | Linoleic acid metabolism    | insomnia                      |
| path:00591 | Linoleic acid metabolism    | infection                     |
| path:00591 | Linoleic acid metabolism    | malaise                       |
| path:00591 | Linoleic acid metabolism    | syncope                       |
| path:00591 | Linoleic acid metabolism    | stomatitis                    |
| path:00591 | Linoleic acid metabolism    | acidosis                      |
| path:00591 | Linoleic acid metabolism    | Stevens – Johnson syndrome    |
| path:00591 | Linoleic acid metabolism    | SIADH                         |
| path:00591 | Linoleic acid metabolism    | shock                         |
| path:00591 | Linoleic acid metabolism    | albuminuria                   |
| path:00591 | Linoleic acid metabolism    | alopecia                      |
| path:00591 | Linoleic acid metabolism    | rectal hemorrhage             |
| path:00591 | Linoleic acid metabolism    | amblyopia                     |
| path:00591 | Linoleic acid metabolism    | amnesia                       |
| path:00591 | Linoleic acid metabolism    | pulmonary embolism            |
| path:00591 | Linoleic acid metabolism    | anemia                        |
| path:00591 | Linoleic acid metabolism    | nightmares                    |
| path:00591 | Linoleic acid metabolism    | photosensitivity              |
| path:00591 | Linoleic acid metabolism    | arthrosis                     |
| path:00591 | Linoleic acid metabolism    | phlebitis                     |
| path:00591 | Linoleic acid metabolism    | peripheral neuropathy         |

|            |                           |                             |
|------------|---------------------------|-----------------------------|
| path:00591 | Linoleic acid metabolism  | tachycardia                 |
| path:00591 | Linoleic acid metabolism  | Parkinson                   |
| path:00591 | Linoleic acid metabolism  | paresthesia                 |
| path:00591 | Linoleic acid metabolism  | paralysis                   |
| path:00591 | Linoleic acid metabolism  | angioedema                  |
| path:00591 | Linoleic acid metabolism  | pancreatitis                |
| path:00591 | Linoleic acid metabolism  | apnea                       |
| path:00591 | Linoleic acid metabolism  | chills                      |
| path:00591 | Linoleic acid metabolism  | nocturia                    |
| path:00591 | Linoleic acid metabolism  | increased salivation        |
| path:00591 | Linoleic acid metabolism  | polyuria                    |
| path:00591 | Linoleic acid metabolism  | thrombophlebitis            |
| path:00591 | Linoleic acid metabolism  | glycosuria                  |
| path:00591 | Linoleic acid metabolism  | constipation                |
| path:00591 | Linoleic acid metabolism  | flatulence                  |
| path:00591 | Linoleic acid metabolism  | hiccup                      |
| path:00591 | Linoleic acid metabolism  | contact dermatitis          |
| path:00591 | Linoleic acid metabolism  | vaginitis                   |
| path:00591 | Linoleic acid metabolism  | hematemesis                 |
| path:00591 | Linoleic acid metabolism  | vaginal hemorrhage          |
| path:00591 | Linoleic acid metabolism  | urticaria                   |
| path:00591 | Linoleic acid metabolism  | hallucinations              |
| path:00591 | Linoleic acid metabolism  | urinary frequency           |
| path:00591 | Linoleic acid metabolism  | dry skin                    |
| path:00591 | Linoleic acid metabolism  | eructation                  |
| path:00591 | Linoleic acid metabolism  | glossitis                   |
| path:00591 | Linoleic acid metabolism  | cystitis                    |
| path:00591 | Linoleic acid metabolism  | ulcerative stomatitis       |
| path:00591 | Linoleic acid metabolism  | dermatitis                  |
| path:00591 | Linoleic acid metabolism  | gastrointestinal hemorrhage |
| path:00591 | Linoleic acid metabolism  | erythema multiforme         |
| path:00591 | Linoleic acid metabolism  | gastritis                   |
| path:00591 | Linoleic acid metabolism  | exfoliative dermatitis      |
| path:00591 | Linoleic acid metabolism  | diplopia                    |
| path:00591 | Linoleic acid metabolism  | galactorrhea                |
| path:00591 | Linoleic acid metabolism  | impotence                   |
| path:00591 | Linoleic acid metabolism  | ecchymosis                  |
| path:00591 | Linoleic acid metabolism  | dyskinesia                  |
| path:00591 | Linoleic acid metabolism  | coma                        |
| path:00591 | Linoleic acid metabolism  | toxic epidermal necrolysis  |
| path:00591 | Linoleic acid metabolism  | urinary incontinence        |
| path:00591 | Linoleic acid metabolism  | hypoxia                     |
| path:00591 | Linoleic acid metabolism  | hypothyroidism              |
| path:00591 | Linoleic acid metabolism  | hypotension                 |
| path:00591 | Linoleic acid metabolism  | confusion                   |
| path:00591 | Linoleic acid metabolism  | hyperglycemia               |
| path:00591 | Linoleic acid metabolism  | urinary retention           |
| path:00591 | Linoleic acid metabolism  | hepatitis                   |
| path:00591 | Linoleic acid metabolism  | dysarthria                  |
| path:00591 | Linoleic acid metabolism  | tremor                      |
| path:00591 | Linoleic acid metabolism  | epistaxis                   |
| path:00591 | Linoleic acid metabolism  | herpes simplex              |
| path:00670 | One carbon pool by folate | leukopenia                  |
| path:00830 | Retinol metabolism        | diplopia                    |
| path:00830 | Retinol metabolism        | dysuria                     |
| path:00830 | Retinol metabolism        | shock                       |

|            |                                              |                               |
|------------|----------------------------------------------|-------------------------------|
| path:00830 | Retinol metabolism                           | somnolence                    |
| path:00830 | Retinol metabolism                           | dysarthria                    |
| path:00830 | Retinol metabolism                           | pulmonary embolism            |
| path:00830 | Retinol metabolism                           | dry skin                      |
| path:00830 | Retinol metabolism                           | SIADH                         |
| path:00830 | Retinol metabolism                           | albuminuria                   |
| path:00830 | Retinol metabolism                           | sleep disorder                |
| path:00830 | Retinol metabolism                           | eructation                    |
| path:00830 | Retinol metabolism                           | amnesia                       |
| path:00830 | Retinol metabolism                           | menstrual disorder            |
| path:00830 | Retinol metabolism                           | colitis                       |
| path:00830 | Retinol metabolism                           | coma                          |
| path:00830 | Retinol metabolism                           | hypoxia                       |
| path:00830 | Retinol metabolism                           | hypotension                   |
| path:00830 | Retinol metabolism                           | hiccup                        |
| path:00830 | Retinol metabolism                           | laryngitis                    |
| path:00830 | Retinol metabolism                           | breast pain                   |
| path:00830 | Retinol metabolism                           | herpes simplex                |
| path:00830 | Retinol metabolism                           | liver function tests abnormal |
| path:00830 | Retinol metabolism                           | confusion                     |
| path:00830 | Retinol metabolism                           | otitis media                  |
| path:00830 | Retinol metabolism                           | hepatitis                     |
| path:00830 | Retinol metabolism                           | phlebitis                     |
| path:00830 | Retinol metabolism                           | stomatitis                    |
| path:00830 | Retinol metabolism                           | migraine                      |
| path:00830 | Retinol metabolism                           | ataxia                        |
| path:00830 | Retinol metabolism                           | neurosis                      |
| path:00830 | Retinol metabolism                           | hallucinations                |
| path:00830 | Retinol metabolism                           | glossitis                     |
| path:00830 | Retinol metabolism                           | gastrointestinal hemorrhage   |
| path:00830 | Retinol metabolism                           | dermatitis                    |
| path:00830 | Retinol metabolism                           | gastritis                     |
| path:00830 | Retinol metabolism                           | anemia                        |
| path:00830 | Retinol metabolism                           | lymphadenopathy               |
| path:00830 | Retinol metabolism                           | tremor                        |
| path:00830 | Retinol metabolism                           | urinary frequency             |
| path:00830 | Retinol metabolism                           | urinary incontinence          |
| path:00830 | Retinol metabolism                           | herpes zoster                 |
| path:00830 | Retinol metabolism                           | tachycardia                   |
| path:00830 | Retinol metabolism                           | ventricular fibrillation      |
| path:00830 | Retinol metabolism                           | vertigo                       |
| path:00900 | Terpenoid backbone biosynthesis              | Dyspepsia                     |
| path:00900 | Terpenoid backbone biosynthesis              | arthralgia                    |
| path:00900 | Terpenoid backbone biosynthesis              | anemia                        |
| path:00900 | Terpenoid backbone biosynthesis              | angioedema                    |
| path:00900 | Terpenoid backbone biosynthesis              | Influenza                     |
| path:00900 | Terpenoid backbone biosynthesis              | hypersensitivity              |
| path:00900 | Terpenoid backbone biosynthesis              | alopecia                      |
| path:00900 | Terpenoid backbone biosynthesis              | infection                     |
| path:00900 | Terpenoid backbone biosynthesis              | myalgia                       |
| path:00910 | Nitrogen metabolism                          | anorexia                      |
| path:00980 | Metabolism of xenobiotics by cytochrome P450 | hallucinations                |
| path:00980 | Metabolism of xenobiotics by cytochrome P450 | ataxia                        |
| path:00980 | Metabolism of xenobiotics by cytochrome P450 | diplopia                      |
| path:00980 | Metabolism of xenobiotics by cytochrome P450 | breast pain                   |
| path:00980 | Metabolism of xenobiotics by cytochrome P450 | hypotension                   |

|            |                                              |                             |
|------------|----------------------------------------------|-----------------------------|
| path:00980 | Metabolism of xenobiotics by cytochrome P450 | amnesia                     |
| path:00980 | Metabolism of xenobiotics by cytochrome P450 | glossitis                   |
| path:00980 | Metabolism of xenobiotics by cytochrome P450 | anemia                      |
| path:00980 | Metabolism of xenobiotics by cytochrome P450 | sleep disorder              |
| path:00980 | Metabolism of xenobiotics by cytochrome P450 | otitis media                |
| path:00980 | Metabolism of xenobiotics by cytochrome P450 | gastrointestinal hemorrhage |
| path:00980 | Metabolism of xenobiotics by cytochrome P450 | SIADH                       |
| path:00980 | Metabolism of xenobiotics by cytochrome P450 | herpes simplex              |
| path:00980 | Metabolism of xenobiotics by cytochrome P450 | phlebitis                   |
| path:00980 | Metabolism of xenobiotics by cytochrome P450 | tremor                      |
| path:00980 | Metabolism of xenobiotics by cytochrome P450 | laryngitis                  |
| path:00980 | Metabolism of xenobiotics by cytochrome P450 | tinnitus                    |
| path:00980 | Metabolism of xenobiotics by cytochrome P450 | bradycardia                 |
| path:00980 | Metabolism of xenobiotics by cytochrome P450 | coma                        |
| path:00980 | Metabolism of xenobiotics by cytochrome P450 | dysuria                     |
| path:00980 | Metabolism of xenobiotics by cytochrome P450 | urinary incontinence        |
| path:00980 | Metabolism of xenobiotics by cytochrome P450 | confusion                   |
| path:00980 | Metabolism of xenobiotics by cytochrome P450 | urinary frequency           |
| path:00980 | Metabolism of xenobiotics by cytochrome P450 | eructation                  |
| path:00980 | Metabolism of xenobiotics by cytochrome P450 | hiccup                      |
| path:00980 | Metabolism of xenobiotics by cytochrome P450 | delirium                    |
| path:00980 | Metabolism of xenobiotics by cytochrome P450 | ventricular fibrillation    |
| path:00980 | Metabolism of xenobiotics by cytochrome P450 | hyperglycemia               |
| path:00980 | Metabolism of xenobiotics by cytochrome P450 | tachycardia                 |
| path:00980 | Metabolism of xenobiotics by cytochrome P450 | albuminuria                 |
| path:00980 | Metabolism of xenobiotics by cytochrome P450 | hypoxia                     |
| path:00982 | Drug metabolism - cytochrome P450            | laryngitis                  |
| path:00982 | Drug metabolism - cytochrome P450            | hypoxia                     |
| path:00982 | Drug metabolism - cytochrome P450            | breast enlargement          |
| path:00982 | Drug metabolism - cytochrome P450            | urinary incontinence        |
| path:00982 | Drug metabolism - cytochrome P450            | urinary frequency           |
| path:00982 | Drug metabolism - cytochrome P450            | coma                        |
| path:00982 | Drug metabolism - cytochrome P450            | breast pain                 |
| path:00982 | Drug metabolism - cytochrome P450            | confusion                   |
| path:00982 | Drug metabolism - cytochrome P450            | eructation                  |
| path:00982 | Drug metabolism - cytochrome P450            | sleep disorder              |
| path:00982 | Drug metabolism - cytochrome P450            | tremor                      |
| path:00982 | Drug metabolism - cytochrome P450            | SIADH                       |
| path:00982 | Drug metabolism - cytochrome P450            | ataxia                      |
| path:00982 | Drug metabolism - cytochrome P450            | somnolence                  |
| path:00982 | Drug metabolism - cytochrome P450            | tachycardia                 |
| path:00982 | Drug metabolism - cytochrome P450            | delirium                    |
| path:00982 | Drug metabolism - cytochrome P450            | hallucinations              |
| path:00983 | Drug metabolism - other enzymes              | peripheral neuropathy       |
| path:00983 | Drug metabolism - other enzymes              | pancytopenia                |
| path:00983 | Drug metabolism - other enzymes              | chills                      |
| path:00983 | Drug metabolism - other enzymes              | sepsis                      |
| path:00983 | Drug metabolism - other enzymes              | confusion                   |
| path:00983 | Drug metabolism - other enzymes              | stomatitis                  |
| path:00983 | Drug metabolism - other enzymes              | dysarthria                  |
| path:00983 | Drug metabolism - other enzymes              | dysuria                     |
| path:00983 | Drug metabolism - other enzymes              | tremor                      |
| path:00983 | Drug metabolism - other enzymes              | hypoxia                     |
| path:00983 | Drug metabolism - other enzymes              | coma                        |
| path:02010 | ABC transporters                             | dehydration                 |
| path:02010 | ABC transporters                             | dermatitis                  |

|            |                        |                             |
|------------|------------------------|-----------------------------|
| path:02010 | ABC transporters       | dyspnea                     |
| path:02010 | ABC transporters       | neutropenia                 |
| path:02010 | ABC transporters       | tumor                       |
| path:02010 | ABC transporters       | hepatitis                   |
| path:02010 | ABC transporters       | thrombocytopenia            |
| path:02010 | ABC transporters       | vomiting                    |
| path:02010 | ABC transporters       | leukopenia                  |
| path:02010 | ABC transporters       | cardiac arrest              |
| path:02010 | ABC transporters       | anemia                      |
| path:02010 | ABC transporters       | alopecia                    |
| path:03040 | Spliceosome            | photosensitivity            |
| path:03040 | Spliceosome            | dry mouth                   |
| path:03040 | Spliceosome            | tremor                      |
| path:03040 | Spliceosome            | somnolence                  |
| path:03320 | PPAR signaling pathway | jaundice                    |
| path:03320 | PPAR signaling pathway | myalgia                     |
| path:03320 | PPAR signaling pathway | hepatitis                   |
| path:03320 | PPAR signaling pathway | rhabdomyolysis              |
| path:04010 | MAPK signaling pathway | leukopenia                  |
| path:04010 | MAPK signaling pathway | petechiae                   |
| path:04010 | MAPK signaling pathway | constitutional symptoms     |
| path:04010 | MAPK signaling pathway | swelling                    |
| path:04010 | MAPK signaling pathway | nocturia                    |
| path:04010 | MAPK signaling pathway | arthralgia                  |
| path:04010 | MAPK signaling pathway | neutropenia                 |
| path:04010 | MAPK signaling pathway | dehydration                 |
| path:04010 | MAPK signaling pathway | pulmonary edema             |
| path:04010 | MAPK signaling pathway | constipation                |
| path:04010 | MAPK signaling pathway | thrombocytopenia            |
| path:04010 | MAPK signaling pathway | dyspnea                     |
| path:04010 | MAPK signaling pathway | congestive heart failure    |
| path:04010 | MAPK signaling pathway | atrial fibrillation         |
| path:04010 | MAPK signaling pathway | neuropathy                  |
| path:04010 | MAPK signaling pathway | muscle cramps               |
| path:04010 | MAPK signaling pathway | mouth ulceration            |
| path:04010 | MAPK signaling pathway | pleural effusion            |
| path:04010 | MAPK signaling pathway | cancer                      |
| path:04010 | MAPK signaling pathway | sepsis                      |
| path:04010 | MAPK signaling pathway | toxic epidermal necrolysis  |
| path:04010 | MAPK signaling pathway | weight loss                 |
| path:04010 | MAPK signaling pathway | peripheral neuropathy       |
| path:04010 | MAPK signaling pathway | flushing                    |
| path:04010 | MAPK signaling pathway | erythema multiforme         |
| path:04010 | MAPK signaling pathway | epistaxis                   |
| path:04010 | MAPK signaling pathway | infection                   |
| path:04010 | MAPK signaling pathway | renal failure               |
| path:04010 | MAPK signaling pathway | stomatitis                  |
| path:04010 | MAPK signaling pathway | Stevens – Johnson syndrome  |
| path:04010 | MAPK signaling pathway | hemoptysis                  |
| path:04010 | MAPK signaling pathway | anemia                      |
| path:04010 | MAPK signaling pathway | gastrointestinal hemorrhage |
| path:04010 | MAPK signaling pathway | heart failure               |
| path:04012 | ErbB signaling pathway | neutropenia                 |
| path:04012 | ErbB signaling pathway | infection                   |
| path:04012 | ErbB signaling pathway | dyspnea                     |
| path:04012 | ErbB signaling pathway | stomatitis                  |

|            |                                        |                                   |
|------------|----------------------------------------|-----------------------------------|
| path:04012 | ErbB signaling pathway                 | hemorrhage                        |
| path:04020 | Calcium signaling pathway              | paralytic ileus                   |
| path:04020 | Calcium signaling pathway              | hypotension                       |
| path:04020 | Calcium signaling pathway              | palpitations                      |
| path:04020 | Calcium signaling pathway              | photophobia                       |
| path:04020 | Calcium signaling pathway              | nervousness                       |
| path:04020 | Calcium signaling pathway              | somnolence                        |
| path:04020 | Calcium signaling pathway              | cold extremities                  |
| path:04020 | Calcium signaling pathway              | neurosis                          |
| path:04020 | Calcium signaling pathway              | postural hypotension              |
| path:04020 | Calcium signaling pathway              | constipation                      |
| path:04020 | Calcium signaling pathway              | grand mal                         |
| path:04020 | Calcium signaling pathway              | choreoathetosis                   |
| path:04020 | Calcium signaling pathway              | atrial fibrillation               |
| path:04020 | Calcium signaling pathway              | tremor                            |
| path:04020 | Calcium signaling pathway              | agitation                         |
| path:04020 | Calcium signaling pathway              | heart block                       |
| path:04020 | Calcium signaling pathway              | nightmares                        |
| path:04020 | Calcium signaling pathway              | tardive dyskinesia                |
| path:04020 | Calcium signaling pathway              | abnormal vision                   |
| path:04020 | Calcium signaling pathway              | blurred vision                    |
| path:04020 | Calcium signaling pathway              | Parkinson                         |
| path:04020 | Calcium signaling pathway              | paranoia                          |
| path:04020 | Calcium signaling pathway              | AV block                          |
| path:04020 | Calcium signaling pathway              | bradycardia                       |
| path:04020 | Calcium signaling pathway              | gynecomastia                      |
| path:04020 | Calcium signaling pathway              | tachycardia                       |
| path:04020 | Calcium signaling pathway              | dry mouth                         |
| path:04020 | Calcium signaling pathway              | psoriasis                         |
| path:04020 | Calcium signaling pathway              | priapism                          |
| path:04020 | Calcium signaling pathway              | fatigue                           |
| path:04020 | Calcium signaling pathway              | torticollis                       |
| path:04020 | Calcium signaling pathway              | increased salivation              |
| path:04020 | Calcium signaling pathway              | sweating                          |
| path:04020 | Calcium signaling pathway              | dyskinesia                        |
| path:04020 | Calcium signaling pathway              | syncope                           |
| path:04020 | Calcium signaling pathway              | keratitis                         |
| path:04020 | Calcium signaling pathway              | lactic dehydrogenase increased    |
| path:04020 | Calcium signaling pathway              | urinary frequency                 |
| path:04020 | Calcium signaling pathway              | eczema                            |
| path:04020 | Calcium signaling pathway              | supraventricular extrasystoles    |
| path:04020 | Calcium signaling pathway              | insomnia                          |
| path:04020 | Calcium signaling pathway              | impotence                         |
| path:04020 | Calcium signaling pathway              | serotonin syndrome                |
| path:04020 | Calcium signaling pathway              | galactorrhea                      |
| path:04020 | Calcium signaling pathway              | ventricular tachycardia           |
| path:04020 | Calcium signaling pathway              | weight gain                       |
| path:04020 | Calcium signaling pathway              | nasal congestion                  |
| path:04020 | Calcium signaling pathway              | pyuria                            |
| path:04020 | Calcium signaling pathway              | urinary retention                 |
| path:04060 | Cytokine-cytokine receptor interaction | hepatitis                         |
| path:04060 | Cytokine-cytokine receptor interaction | pancreatitis                      |
| path:04060 | Cytokine-cytokine receptor interaction | eczema                            |
| path:04060 | Cytokine-cytokine receptor interaction | epistaxis                         |
| path:04060 | Cytokine-cytokine receptor interaction | upper respiratory tract infection |
| path:04060 | Cytokine-cytokine receptor interaction | pancytopenia                      |



|            |                                         |                           |
|------------|-----------------------------------------|---------------------------|
| path:04060 | Cytokine-cytokine receptor interaction  | muscle cramps             |
| path:04060 | Cytokine-cytokine receptor interaction  | conjunctivitis            |
| path:04060 | Cytokine-cytokine receptor interaction  | neutropenia               |
| path:04060 | Cytokine-cytokine receptor interaction  | myalgia                   |
| path:04060 | Cytokine-cytokine receptor interaction  | Dyspepsia                 |
| path:04060 | Cytokine-cytokine receptor interaction  | Influenza                 |
| path:04060 | Cytokine-cytokine receptor interaction  | arthralgia                |
| path:04060 | Cytokine-cytokine receptor interaction  | infection                 |
| path:04060 | Cytokine-cytokine receptor interaction  | abdominal pain            |
| path:04062 | Chemokine signaling pathway             | lupus                     |
| path:04062 | Chemokine signaling pathway             | dyspnea                   |
| path:04062 | Chemokine signaling pathway             | muscle cramps             |
| path:04080 | Neuroactive ligand-receptor interaction | glaucoma                  |
| path:04080 | Neuroactive ligand-receptor interaction | torticollis               |
| path:04080 | Neuroactive ligand-receptor interaction | increased salivation      |
| path:04080 | Neuroactive ligand-receptor interaction | impotence                 |
| path:04080 | Neuroactive ligand-receptor interaction | galactorrhea              |
| path:04080 | Neuroactive ligand-receptor interaction | ventricular extrasystoles |
| path:04080 | Neuroactive ligand-receptor interaction | hypoventilation           |
| path:04080 | Neuroactive ligand-receptor interaction | fecal impaction           |
| path:04080 | Neuroactive ligand-receptor interaction | hypotension               |
| path:04080 | Neuroactive ligand-receptor interaction | keratitis                 |
| path:04080 | Neuroactive ligand-receptor interaction | goiter                    |
| path:04080 | Neuroactive ligand-receptor interaction | grand mal                 |
| path:04080 | Neuroactive ligand-receptor interaction | hallucinations            |
| path:04080 | Neuroactive ligand-receptor interaction | paralytic ileus           |
| path:04080 | Neuroactive ligand-receptor interaction | heart block               |
| path:04080 | Neuroactive ligand-receptor interaction | hyperacusis               |
| path:04080 | Neuroactive ligand-receptor interaction | hiccup                    |
| path:04080 | Neuroactive ligand-receptor interaction | paranoia                  |
| path:04080 | Neuroactive ligand-receptor interaction | wheezing                  |
| path:04080 | Neuroactive ligand-receptor interaction | tremor                    |
| path:04080 | Neuroactive ligand-receptor interaction | hypothermia               |
| path:04080 | Neuroactive ligand-receptor interaction | dysarthria                |
| path:04080 | Neuroactive ligand-receptor interaction | urinary urgency           |
| path:04080 | Neuroactive ligand-receptor interaction | tardive dyskinesia        |
| path:04080 | Neuroactive ligand-receptor interaction | nervousness               |
| path:04080 | Neuroactive ligand-receptor interaction | diplopia                  |
| path:04080 | Neuroactive ligand-receptor interaction | drug dependence           |
| path:04080 | Neuroactive ligand-receptor interaction | palpitations              |
| path:04080 | Neuroactive ligand-receptor interaction | dry mouth                 |
| path:04080 | Neuroactive ligand-receptor interaction | tachycardia               |
| path:04080 | Neuroactive ligand-receptor interaction | insomnia                  |
| path:04080 | Neuroactive ligand-receptor interaction | urinary retention         |
| path:04080 | Neuroactive ligand-receptor interaction | urinary hesitancy         |
| path:04080 | Neuroactive ligand-receptor interaction | urinary incontinence      |
| path:04080 | Neuroactive ligand-receptor interaction | dyskinesia                |
| path:04080 | Neuroactive ligand-receptor interaction | confusion                 |
| path:04080 | Neuroactive ligand-receptor interaction | dysmenorrhea              |
| path:04080 | Neuroactive ligand-receptor interaction | delirium                  |
| path:04080 | Neuroactive ligand-receptor interaction | laryngitis                |
| path:04080 | Neuroactive ligand-receptor interaction | labyrinthitis             |
| path:04080 | Neuroactive ligand-receptor interaction | nightmares                |
| path:04080 | Neuroactive ligand-receptor interaction | Toothache                 |
| path:04080 | Neuroactive ligand-receptor interaction | nasal congestion          |
| path:04080 | Neuroactive ligand-receptor interaction | blurred vision            |

|            |                                         |                                |
|------------|-----------------------------------------|--------------------------------|
| path:04080 | Neuroactive ligand-receptor interaction | syncope                        |
| path:04080 | Neuroactive ligand-receptor interaction | ventricular tachycardia        |
| path:04080 | Neuroactive ligand-receptor interaction | spasm                          |
| path:04080 | Neuroactive ligand-receptor interaction | ataxia                         |
| path:04080 | Neuroactive ligand-receptor interaction | stridor                        |
| path:04080 | Neuroactive ligand-receptor interaction | seizures                       |
| path:04080 | Neuroactive ligand-receptor interaction | sweating                       |
| path:04080 | Neuroactive ligand-receptor interaction | serotonin syndrome             |
| path:04080 | Neuroactive ligand-receptor interaction | personality disorder           |
| path:04080 | Neuroactive ligand-receptor interaction | supraventricular extrasystoles |
| path:04080 | Neuroactive ligand-receptor interaction | anxiety                        |
| path:04080 | Neuroactive ligand-receptor interaction | agitation                      |
| path:04080 | Neuroactive ligand-receptor interaction | postural hypotension           |
| path:04080 | Neuroactive ligand-receptor interaction | abnormal gait                  |
| path:04080 | Neuroactive ligand-receptor interaction | abnormal vision                |
| path:04080 | Neuroactive ligand-receptor interaction | photophobia                    |
| path:04080 | Neuroactive ligand-receptor interaction | Parkinson                      |
| path:04080 | Neuroactive ligand-receptor interaction | sneezing                       |
| path:04080 | Neuroactive ligand-receptor interaction | priapism                       |
| path:04080 | Neuroactive ligand-receptor interaction | apnea                          |
| path:04080 | Neuroactive ligand-receptor interaction | voice alteration               |
| path:04080 | Neuroactive ligand-receptor interaction | psoriasis                      |
| path:04080 | Neuroactive ligand-receptor interaction | bradycardia                    |
| path:04080 | Neuroactive ligand-receptor interaction | abuse                          |
| path:04080 | Neuroactive ligand-receptor interaction | cardiac arrest                 |
| path:04080 | Neuroactive ligand-receptor interaction | pyelonephritis                 |
| path:04080 | Neuroactive ligand-receptor interaction | somnolence                     |
| path:04114 | Oocyte meiosis                          | gynecomastia                   |
| path:04115 | p53 signaling pathway                   | renal failure                  |
| path:04115 | p53 signaling pathway                   | dyspnea                        |
| path:04115 | p53 signaling pathway                   | leukopenia                     |
| path:04115 | p53 signaling pathway                   | neutropenia                    |
| path:04115 | p53 signaling pathway                   | anorexia                       |
| path:04115 | p53 signaling pathway                   | congestive heart failure       |
| path:04115 | p53 signaling pathway                   | stomatitis                     |
| path:04115 | p53 signaling pathway                   | chills                         |
| path:04115 | p53 signaling pathway                   | asthenia                       |
| path:04115 | p53 signaling pathway                   | anemia                         |
| path:04115 | p53 signaling pathway                   | hypersensitivity               |
| path:04115 | p53 signaling pathway                   | diarrhea                       |
| path:04115 | p53 signaling pathway                   | increased sweating             |
| path:04115 | p53 signaling pathway                   | neuropathy                     |
| path:04115 | p53 signaling pathway                   | thrombocytopenia               |
| path:04144 | Endocytosis                             | congestive heart failure       |
| path:04144 | Endocytosis                             | decreased libido               |
| path:04144 | Endocytosis                             | lightheadedness                |
| path:04144 | Endocytosis                             | dizziness                      |
| path:04144 | Endocytosis                             | heart block                    |
| path:04144 | Endocytosis                             | bradycardia                    |
| path:04144 | Endocytosis                             | flushing                       |
| path:04144 | Endocytosis                             | pain                           |
| path:04144 | Endocytosis                             | nausea                         |
| path:04144 | Endocytosis                             | psoriasis                      |
| path:04144 | Endocytosis                             | anxiety                        |
| path:04144 | Endocytosis                             | dry eyes                       |
| path:04144 | Endocytosis                             | fatigue                        |

|            |                                    |                                   |
|------------|------------------------------------|-----------------------------------|
| path:04144 | Endocytosis                        | pulmonary edema                   |
| path:04144 | Endocytosis                        | AV block                          |
| path:04144 | Endocytosis                        | mental depression                 |
| path:04144 | Endocytosis                        | sore throat                       |
| path:04144 | Endocytosis                        | memory loss                       |
| path:04144 | Endocytosis                        | nightmares                        |
| path:04144 | Endocytosis                        | insomnia                          |
| path:04144 | Endocytosis                        | hypokalemia                       |
| path:04144 | Endocytosis                        | bronchospasm                      |
| path:04144 | Endocytosis                        | fever                             |
| path:04150 | mTOR signaling pathway             | dyspnea                           |
| path:04210 | Apoptosis                          | cough                             |
| path:04210 | Apoptosis                          | thrombocytopenia                  |
| path:04210 | Apoptosis                          | pneumonia                         |
| path:04210 | Apoptosis                          | hypersensitivity                  |
| path:04210 | Apoptosis                          | neutropenia                       |
| path:04210 | Apoptosis                          | heart failure                     |
| path:04210 | Apoptosis                          | dyspnea                           |
| path:04210 | Apoptosis                          | Sinusitis                         |
| path:04210 | Apoptosis                          | upper respiratory tract infection |
| path:04210 | Apoptosis                          | anemia                            |
| path:04210 | Apoptosis                          | fever                             |
| path:04210 | Apoptosis                          | pancytopenia                      |
| path:04210 | Apoptosis                          | infection                         |
| path:04210 | Apoptosis                          | peripheral neuropathy             |
| path:04210 | Apoptosis                          | stomatitis                        |
| path:04210 | Apoptosis                          | alopecia                          |
| path:04210 | Apoptosis                          | conjunctivitis                    |
| path:04210 | Apoptosis                          | edema                             |
| path:04210 | Apoptosis                          | hematuria                         |
| path:04210 | Apoptosis                          | congestive heart failure          |
| path:04210 | Apoptosis                          | leukopenia                        |
| path:04210 | Apoptosis                          | anorexia                          |
| path:04210 | Apoptosis                          | arthralgia                        |
| path:04270 | Vascular smooth muscle contraction | postural hypotension              |
| path:04270 | Vascular smooth muscle contraction | amenorrhea                        |
| path:04270 | Vascular smooth muscle contraction | impotence                         |
| path:04270 | Vascular smooth muscle contraction | increased salivation              |
| path:04270 | Vascular smooth muscle contraction | hyperglycemia                     |
| path:04270 | Vascular smooth muscle contraction | chest pain                        |
| path:04270 | Vascular smooth muscle contraction | tardive dyskinesia                |
| path:04270 | Vascular smooth muscle contraction | paralytic ileus                   |
| path:04270 | Vascular smooth muscle contraction | dry mouth                         |
| path:04270 | Vascular smooth muscle contraction | nasal congestion                  |
| path:04270 | Vascular smooth muscle contraction | Parkinson                         |
| path:04270 | Vascular smooth muscle contraction | priapism                          |
| path:04270 | Vascular smooth muscle contraction | torticollis                       |
| path:04270 | Vascular smooth muscle contraction | dyskinesia                        |
| path:04270 | Vascular smooth muscle contraction | tachycardia                       |
| path:04270 | Vascular smooth muscle contraction | glycosuria                        |
| path:04270 | Vascular smooth muscle contraction | spasm                             |
| path:04270 | Vascular smooth muscle contraction | palpitations                      |
| path:04270 | Vascular smooth muscle contraction | gynecomastia                      |
| path:04310 | Wnt signaling pathway              | anemia                            |
| path:04350 | TGF-beta signaling pathway         | anorexia                          |
| path:04370 | VEGF signaling pathway             | sepsis                            |

|            |                        |                             |
|------------|------------------------|-----------------------------|
| path:04370 | VEGF signaling pathway | aplastic anemia             |
| path:04370 | VEGF signaling pathway | alopecia                    |
| path:04370 | VEGF signaling pathway | infection                   |
| path:04370 | VEGF signaling pathway | rectal hemorrhage           |
| path:04370 | VEGF signaling pathway | dysuria                     |
| path:04370 | VEGF signaling pathway | gastrointestinal hemorrhage |
| path:04370 | VEGF signaling pathway | dyspnea                     |
| path:04370 | VEGF signaling pathway | eosinophilia                |
| path:04370 | VEGF signaling pathway | anemia                      |
| path:04370 | VEGF signaling pathway | proteinuria                 |
| path:04370 | VEGF signaling pathway | leukopenia                  |
| path:04370 | VEGF signaling pathway | pruritus                    |
| path:04370 | VEGF signaling pathway | jaundice                    |
| path:04370 | VEGF signaling pathway | interstitial nephritis      |
| path:04370 | VEGF signaling pathway | ecchymosis                  |
| path:04370 | VEGF signaling pathway | Dyspepsia                   |
| path:04370 | VEGF signaling pathway | eructation                  |
| path:04370 | VEGF signaling pathway | erythema multiforme         |
| path:04370 | VEGF signaling pathway | thrombocytopenia            |
| path:04370 | VEGF signaling pathway | purpura                     |
| path:04370 | VEGF signaling pathway | toxic epidermal necrolysis  |
| path:04370 | VEGF signaling pathway | angioedema                  |
| path:04370 | VEGF signaling pathway | exfoliative dermatitis      |
| path:04370 | VEGF signaling pathway | gastritis                   |
| path:04370 | VEGF signaling pathway | epistaxis                   |
| path:04370 | VEGF signaling pathway | renal failure               |
| path:04370 | VEGF signaling pathway | melen                       |
| path:04370 | VEGF signaling pathway | flatulence                  |
| path:04370 | VEGF signaling pathway | esophagitis                 |
| path:04370 | VEGF signaling pathway | hepatitis                   |
| path:04370 | VEGF signaling pathway | colitis                     |
| path:04370 | VEGF signaling pathway | hemolytic anemia            |
| path:04370 | VEGF signaling pathway | pancreatitis                |
| path:04370 | VEGF signaling pathway | vertigo                     |
| path:04370 | VEGF signaling pathway | pancytopenia                |
| path:04370 | VEGF signaling pathway | peripheral neuropathy       |
| path:04370 | VEGF signaling pathway | hepatic failure             |
| path:04370 | VEGF signaling pathway | photosensitivity            |
| path:04370 | VEGF signaling pathway | stomatitis                  |
| path:04370 | VEGF signaling pathway | hematemesis                 |
| path:04370 | VEGF signaling pathway | Stevens – Johnson syndrome  |
| path:04370 | VEGF signaling pathway | peptic ulcer                |
| path:04370 | VEGF signaling pathway | ulcer                       |
| path:04370 | VEGF signaling pathway | pneumonia                   |
| path:04370 | VEGF signaling pathway | hearing loss                |
| path:04370 | VEGF signaling pathway | vasculitis                  |
| path:04370 | VEGF signaling pathway | congestive heart failure    |
| path:04370 | VEGF signaling pathway | conjunctivitis              |
| path:04370 | VEGF signaling pathway | dry skin                    |
| path:04370 | VEGF signaling pathway | hematuria                   |
| path:04370 | VEGF signaling pathway | asthenia                    |
| path:04510 | Focal adhesion         | erythema multiforme         |
| path:04510 | Focal adhesion         | stomatitis                  |
| path:04510 | Focal adhesion         | pancreatitis                |
| path:04510 | Focal adhesion         | weight loss                 |
| path:04510 | Focal adhesion         | gastritis                   |

|            |                   |                          |
|------------|-------------------|--------------------------|
| path:04510 | Focal adhesion    | congestive heart failure |
| path:04510 | Focal adhesion    | dyspnea                  |
| path:04510 | Focal adhesion    | hemorrhage               |
| path:04510 | Focal adhesion    | flushing                 |
| path:04510 | Focal adhesion    | exfoliative dermatitis   |
| path:04510 | Focal adhesion    | anemia                   |
| path:04510 | Focal adhesion    | constitutional symptoms  |
| path:04510 | Focal adhesion    | peripheral edema         |
| path:04510 | Focal adhesion    | Vascular Disorders       |
| path:04510 | Focal adhesion    | epistaxis                |
| path:04520 | Adherens junction | anemia                   |
| path:04520 | Adherens junction | rash                     |
| path:04520 | Adherens junction | infection                |
| path:04520 | Adherens junction | arthralgia               |
| path:04520 | Adherens junction | dyspnea                  |
| path:04520 | Adherens junction | edema                    |
| path:04520 | Adherens junction | asthenia                 |
| path:04520 | Adherens junction | Dyspepsia                |
| path:04520 | Adherens junction | anorexia                 |
| path:04520 | Adherens junction | diarrhea                 |
| path:04520 | Adherens junction | constipation             |
| path:04540 | Gap junction      | palpitations             |
| path:04540 | Gap junction      | galactorrhea             |
| path:04540 | Gap junction      | leukocytosis             |
| path:04540 | Gap junction      | personality disorder     |
| path:04540 | Gap junction      | hypotension              |
| path:04540 | Gap junction      | skin ulcer               |
| path:04540 | Gap junction      | insomnia                 |
| path:04540 | Gap junction      | suicide attempt          |
| path:04540 | Gap junction      | breast enlargement       |
| path:04540 | Gap junction      | edema                    |
| path:04540 | Gap junction      | congestive heart failure |
| path:04540 | Gap junction      | exfoliative dermatitis   |
| path:04540 | Gap junction      | paranoia                 |
| path:04540 | Gap junction      | Parkinson                |
| path:04540 | Gap junction      | cholecystitis            |
| path:04540 | Gap junction      | paralytic ileus          |
| path:04540 | Gap junction      | cardiomyopathy           |
| path:04540 | Gap junction      | flushing                 |
| path:04540 | Gap junction      | increased salivation     |
| path:04540 | Gap junction      | cold extremities         |
| path:04540 | Gap junction      | peripheral edema         |
| path:04540 | Gap junction      | fecal incontinence       |
| path:04540 | Gap junction      | torticollis              |
| path:04540 | Gap junction      | fatigue                  |
| path:04540 | Gap junction      | amenorrhea               |
| path:04540 | Gap junction      | ventricular fibrillation |
| path:04540 | Gap junction      | ischemic colitis         |
| path:04540 | Gap junction      | syncope                  |
| path:04540 | Gap junction      | bundle branch block      |
| path:04540 | Gap junction      | impotence                |
| path:04540 | Gap junction      | shortness of breath      |
| path:04540 | Gap junction      | bronchospasm             |
| path:04540 | Gap junction      | tachycardia              |
| path:04540 | Gap junction      | weight gain              |
| path:04540 | Gap junction      | confusion                |

|            |              |                                |
|------------|--------------|--------------------------------|
| path:04540 | Gap junction | weakness                       |
| path:04540 | Gap junction | ventricular tachycardia        |
| path:04540 | Gap junction | SIADH                          |
| path:04540 | Gap junction | hypothyroidism                 |
| path:04540 | Gap junction | seizures                       |
| path:04540 | Gap junction | tardive dyskinesia             |
| path:04540 | Gap junction | dysphagia                      |
| path:04540 | Gap junction | dyskinesia                     |
| path:04540 | Gap junction | neuralgia                      |
| path:04540 | Gap junction | mental depression              |
| path:04540 | Gap junction | menorrhagia                    |
| path:04540 | Gap junction | hyperhidrosis                  |
| path:04540 | Gap junction | anxiety                        |
| path:04540 | Gap junction | psychosis                      |
| path:04540 | Gap junction | tremor                         |
| path:04540 | Gap junction | neurosis                       |
| path:04540 | Gap junction | hypokalemia                    |
| path:04540 | Gap junction | agranulocytosis                |
| path:04540 | Gap junction | gynecomastia                   |
| path:04540 | Gap junction | ataxia                         |
| path:04540 | Gap junction | dysmenorrhea                   |
| path:04540 | Gap junction | alkaline phosphatase increased |
| path:04540 | Gap junction | urinary incontinence           |
| path:04540 | Gap junction | sweating                       |
| path:04540 | Gap junction | weight loss                    |
| path:04540 | Gap junction | priapism                       |
| path:04540 | Gap junction | urinary retention              |
| path:04540 | Gap junction | postural hypotension           |
| path:04540 | Gap junction | arrhythmia                     |
| path:04540 | Gap junction | asthma                         |
| path:04540 | Gap junction | nasal congestion               |
| path:04540 | Gap junction | heart block                    |
| path:04540 | Gap junction | dizziness                      |
| path:04540 | Gap junction | spasm                          |
| path:04540 | Gap junction | hallucinations                 |
| path:04540 | Gap junction | psoriasis                      |
| path:04540 | Gap junction | dry mouth                      |
| path:04540 | Gap junction | hypertension                   |
| path:04540 | Gap junction | abnormal gait                  |
| path:04540 | Gap junction | bradycardia                    |
| path:04540 | Gap junction | eczema                         |
| path:04540 | Gap junction | constipation                   |
| path:04540 | Gap junction | delirium                       |
| path:04540 | Gap junction | nightmares                     |
| path:04540 | Gap junction | hypoglycemia                   |
| path:04540 | Gap junction | goiter                         |
| path:04540 | Gap junction | heart failure                  |
| path:04540 | Gap junction | dyspnea                        |
| path:04540 | Gap junction | lightheadedness                |
| path:04540 | Gap junction | deafness                       |
| path:04540 | Gap junction | decreased libido               |
| path:04540 | Gap junction | dehydration                    |
| path:04540 | Gap junction | AV block                       |
| path:04540 | Gap junction | sore throat                    |
| path:04540 | Gap junction | grand mal                      |
| path:04540 | Gap junction | somnolence                     |

|            |                                     |                            |
|------------|-------------------------------------|----------------------------|
| path:04540 | Gap junction                        | lupus                      |
| path:04540 | Gap junction                        | blepharitis                |
| path:04540 | Gap junction                        | purpura                    |
| path:04610 | Complement and coagulation cascades | vasculitis                 |
| path:04610 | Complement and coagulation cascades | flatulence                 |
| path:04610 | Complement and coagulation cascades | anemia                     |
| path:04610 | Complement and coagulation cascades | acute renal failure        |
| path:04610 | Complement and coagulation cascades | hepatitis                  |
| path:04610 | Complement and coagulation cascades | urticaria                  |
| path:04610 | Complement and coagulation cascades | diarrhea                   |
| path:04610 | Complement and coagulation cascades | pruritus                   |
| path:04610 | Complement and coagulation cascades | thrombocytopenia           |
| path:04610 | Complement and coagulation cascades | renal failure              |
| path:04614 | Renin-angiotensin system            | hyperuricemia              |
| path:04614 | Renin-angiotensin system            | abdominal pain             |
| path:04614 | Renin-angiotensin system            | weakness                   |
| path:04614 | Renin-angiotensin system            | hemolytic anemia           |
| path:04614 | Renin-angiotensin system            | alopecia                   |
| path:04614 | Renin-angiotensin system            | hyponatremia               |
| path:04614 | Renin-angiotensin system            | flushing                   |
| path:04614 | Renin-angiotensin system            | headache                   |
| path:04614 | Renin-angiotensin system            | impotence                  |
| path:04614 | Renin-angiotensin system            | hyperkalemia               |
| path:04614 | Renin-angiotensin system            | hyperglycemia              |
| path:04614 | Renin-angiotensin system            | gout                       |
| path:04614 | Renin-angiotensin system            | Stevens - Johnson syndrome |
| path:04614 | Renin-angiotensin system            | hepatitis                  |
| path:04614 | Renin-angiotensin system            | glycosuria                 |
| path:04614 | Renin-angiotensin system            | dermatitis                 |
| path:04614 | Renin-angiotensin system            | tinnitus                   |
| path:04614 | Renin-angiotensin system            | vasculitis                 |
| path:04614 | Renin-angiotensin system            | myalgia                    |
| path:04614 | Renin-angiotensin system            | pancreatitis               |
| path:04614 | Renin-angiotensin system            | AV block                   |
| path:04614 | Renin-angiotensin system            | renal failure              |
| path:04614 | Renin-angiotensin system            | palpitations               |
| path:04614 | Renin-angiotensin system            | arthralgia                 |
| path:04614 | Renin-angiotensin system            | thrombocytopenia           |
| path:04614 | Renin-angiotensin system            | bronchospasm               |
| path:04614 | Renin-angiotensin system            | rash                       |
| path:04614 | Renin-angiotensin system            | Dyspepsia                  |
| path:04614 | Renin-angiotensin system            | urinary frequency          |
| path:04614 | Renin-angiotensin system            | paresthesia                |
| path:04614 | Renin-angiotensin system            | photosensitivity           |
| path:04614 | Renin-angiotensin system            | dyspnea                    |
| path:04614 | Renin-angiotensin system            | purpura                    |
| path:04614 | Renin-angiotensin system            | constipation               |
| path:04614 | Renin-angiotensin system            | muscle cramps              |
| path:04614 | Renin-angiotensin system            | angina pectoris            |
| path:04614 | Renin-angiotensin system            | exfoliative dermatitis     |
| path:04614 | Renin-angiotensin system            | postural hypotension       |
| path:04614 | Renin-angiotensin system            | asthenia                   |
| path:04614 | Renin-angiotensin system            | dizziness                  |
| path:04614 | Renin-angiotensin system            | fatigue                    |
| path:04614 | Renin-angiotensin system            | rhinitis                   |
| path:04614 | Renin-angiotensin system            | angioedema                 |

|            |                                       |                                   |
|------------|---------------------------------------|-----------------------------------|
| path:04614 | Renin-angiotensin system              | diarrhea                          |
| path:04614 | Renin-angiotensin system              | erythema multiforme               |
| path:04614 | Renin-angiotensin system              | vertigo                           |
| path:04614 | Renin-angiotensin system              | rhabdomyolysis                    |
| path:04614 | Renin-angiotensin system              | syncope                           |
| path:04614 | Renin-angiotensin system              | chest pain                        |
| path:04614 | Renin-angiotensin system              | renal insufficiency               |
| path:04620 | Toll-like receptor signaling pathway  | purpura                           |
| path:04620 | Toll-like receptor signaling pathway  | anemia                            |
| path:04620 | Toll-like receptor signaling pathway  | anorexia                          |
| path:04620 | Toll-like receptor signaling pathway  | abdominal pain                    |
| path:04620 | Toll-like receptor signaling pathway  | muscle cramps                     |
| path:04620 | Toll-like receptor signaling pathway  | fever                             |
| path:04620 | Toll-like receptor signaling pathway  | arthritis                         |
| path:04620 | Toll-like receptor signaling pathway  | neutropenia                       |
| path:04620 | Toll-like receptor signaling pathway  | conjunctivitis                    |
| path:04620 | Toll-like receptor signaling pathway  | pancreatitis                      |
| path:04620 | Toll-like receptor signaling pathway  | upper respiratory tract infection |
| path:04620 | Toll-like receptor signaling pathway  | angioedema                        |
| path:04620 | Toll-like receptor signaling pathway  | epistaxis                         |
| path:04621 | NOD-like receptor signaling pathway   | Dyspepsia                         |
| path:04621 | NOD-like receptor signaling pathway   | dermatitis                        |
| path:04621 | NOD-like receptor signaling pathway   | neutropenia                       |
| path:04621 | NOD-like receptor signaling pathway   | infection                         |
| path:04621 | NOD-like receptor signaling pathway   | myalgia                           |
| path:04621 | NOD-like receptor signaling pathway   | photosensitivity                  |
| path:04621 | NOD-like receptor signaling pathway   | Pharyngitis                       |
| path:04621 | NOD-like receptor signaling pathway   | malaise                           |
| path:04621 | NOD-like receptor signaling pathway   | hypersensitivity                  |
| path:04621 | NOD-like receptor signaling pathway   | muscle cramps                     |
| path:04621 | NOD-like receptor signaling pathway   | arthritis                         |
| path:04621 | NOD-like receptor signaling pathway   | alopecia                          |
| path:04621 | NOD-like receptor signaling pathway   | flatulence                        |
| path:04621 | NOD-like receptor signaling pathway   | peripheral neuropathy             |
| path:04621 | NOD-like receptor signaling pathway   | fever                             |
| path:04621 | NOD-like receptor signaling pathway   | hepatitis                         |
| path:04621 | NOD-like receptor signaling pathway   | anemia                            |
| path:04621 | NOD-like receptor signaling pathway   | rhinitis                          |
| path:04621 | NOD-like receptor signaling pathway   | abdominal pain                    |
| path:04621 | NOD-like receptor signaling pathway   | stomatitis                        |
| path:04621 | NOD-like receptor signaling pathway   | epistaxis                         |
| path:04621 | NOD-like receptor signaling pathway   | toxic epidermal necrolysis        |
| path:04621 | NOD-like receptor signaling pathway   | vomiting                          |
| path:04621 | NOD-like receptor signaling pathway   | pancreatitis                      |
| path:04621 | NOD-like receptor signaling pathway   | thrombocytopenia                  |
| path:04621 | NOD-like receptor signaling pathway   | jaundice                          |
| path:04621 | NOD-like receptor signaling pathway   | upper respiratory tract infection |
| path:04621 | NOD-like receptor signaling pathway   | angioedema                        |
| path:04621 | NOD-like receptor signaling pathway   | edema                             |
| path:04621 | NOD-like receptor signaling pathway   | eczema                            |
| path:04621 | NOD-like receptor signaling pathway   | anorexia                          |
| path:04621 | NOD-like receptor signaling pathway   | purpura                           |
| path:04621 | NOD-like receptor signaling pathway   | conjunctivitis                    |
| path:04621 | NOD-like receptor signaling pathway   | dyspnea                           |
| path:04621 | NOD-like receptor signaling pathway   | Sinusitis                         |
| path:04622 | RIG-I-like receptor signaling pathway | malaise                           |



|            |                                           |                                   |
|------------|-------------------------------------------|-----------------------------------|
| path:04622 | RIG-I-like receptor signaling pathway     | abdominal pain                    |
| path:04622 | RIG-I-like receptor signaling pathway     | conjunctivitis                    |
| path:04622 | RIG-I-like receptor signaling pathway     | dyspnea                           |
| path:04622 | RIG-I-like receptor signaling pathway     | infection                         |
| path:04622 | RIG-I-like receptor signaling pathway     | urinary tract infection           |
| path:04622 | RIG-I-like receptor signaling pathway     | hypersensitivity                  |
| path:04622 | RIG-I-like receptor signaling pathway     | fever                             |
| path:04622 | RIG-I-like receptor signaling pathway     | Dyspepsia                         |
| path:04622 | RIG-I-like receptor signaling pathway     | anorexia                          |
| path:04622 | RIG-I-like receptor signaling pathway     | upper respiratory tract infection |
| path:04622 | RIG-I-like receptor signaling pathway     | epistaxis                         |
| path:04622 | RIG-I-like receptor signaling pathway     | Sinusitis                         |
| path:04630 | Jak-STAT signaling pathway                | upper respiratory tract infection |
| path:04630 | Jak-STAT signaling pathway                | Dyspepsia                         |
| path:04630 | Jak-STAT signaling pathway                | hepatitis                         |
| path:04630 | Jak-STAT signaling pathway                | Sinusitis                         |
| path:04630 | Jak-STAT signaling pathway                | fever                             |
| path:04630 | Jak-STAT signaling pathway                | insomnia                          |
| path:04630 | Jak-STAT signaling pathway                | edema                             |
| path:04630 | Jak-STAT signaling pathway                | angioedema                        |
| path:04630 | Jak-STAT signaling pathway                | Pharyngitis                       |
| path:04630 | Jak-STAT signaling pathway                | abdominal pain                    |
| path:04630 | Jak-STAT signaling pathway                | myalgia                           |
| path:04640 | Hematopoietic cell lineage                | hepatitis                         |
| path:04640 | Hematopoietic cell lineage                | hemorrhage                        |
| path:04640 | Hematopoietic cell lineage                | pancreatitis                      |
| path:04640 | Hematopoietic cell lineage                | upper respiratory tract infection |
| path:04640 | Hematopoietic cell lineage                | pancytopenia                      |
| path:04640 | Hematopoietic cell lineage                | thrombocytopenia                  |
| path:04650 | Natural killer cell mediated cytotoxicity | ulcer                             |
| path:04650 | Natural killer cell mediated cytotoxicity | fever                             |
| path:04650 | Natural killer cell mediated cytotoxicity | cough                             |
| path:04650 | Natural killer cell mediated cytotoxicity | flushing                          |
| path:04650 | Natural killer cell mediated cytotoxicity | alopecia                          |
| path:04650 | Natural killer cell mediated cytotoxicity | epistaxis                         |
| path:04650 | Natural killer cell mediated cytotoxicity | dyspnea                           |
| path:04650 | Natural killer cell mediated cytotoxicity | abdominal pain                    |
| path:04650 | Natural killer cell mediated cytotoxicity | conjunctivitis                    |
| path:04650 | Natural killer cell mediated cytotoxicity | hypokalemia                       |
| path:04650 | Natural killer cell mediated cytotoxicity | hypersensitivity                  |
| path:04650 | Natural killer cell mediated cytotoxicity | Influenza                         |
| path:04650 | Natural killer cell mediated cytotoxicity | neutropenia                       |
| path:04650 | Natural killer cell mediated cytotoxicity | infection                         |
| path:04660 | T cell receptor signaling pathway         | anorexia                          |
| path:04660 | T cell receptor signaling pathway         | angioedema                        |
| path:04660 | T cell receptor signaling pathway         | upper respiratory tract infection |
| path:04660 | T cell receptor signaling pathway         | pneumonia                         |
| path:04660 | T cell receptor signaling pathway         | Dyspepsia                         |
| path:04660 | T cell receptor signaling pathway         | gastroenteritis                   |
| path:04660 | T cell receptor signaling pathway         | epistaxis                         |
| path:04660 | T cell receptor signaling pathway         | infection                         |
| path:04660 | T cell receptor signaling pathway         | muscle cramps                     |
| path:04660 | T cell receptor signaling pathway         | purpura                           |
| path:04660 | T cell receptor signaling pathway         | hepatitis                         |
| path:04660 | T cell receptor signaling pathway         | arthralgia                        |
| path:04660 | T cell receptor signaling pathway         | dermatitis                        |

|            |                                              |                                   |
|------------|----------------------------------------------|-----------------------------------|
| path:04660 | T cell receptor signaling pathway            | Influenza                         |
| path:04660 | T cell receptor signaling pathway            | conjunctivitis                    |
| path:04660 | T cell receptor signaling pathway            | pancreatitis                      |
| path:04660 | T cell receptor signaling pathway            | exfoliative dermatitis            |
| path:04660 | T cell receptor signaling pathway            | hypersensitivity                  |
| path:04660 | T cell receptor signaling pathway            | abdominal pain                    |
| path:04660 | T cell receptor signaling pathway            | fever                             |
| path:04660 | T cell receptor signaling pathway            | Sinusitis                         |
| path:04662 | B cell receptor signaling pathway            | arthralgia                        |
| path:04662 | B cell receptor signaling pathway            | dyspnea                           |
| path:04664 | Fc epsilon RI signaling pathway              | infection                         |
| path:04664 | Fc epsilon RI signaling pathway              | pancreatitis                      |
| path:04664 | Fc epsilon RI signaling pathway              | erythema multiforme               |
| path:04664 | Fc epsilon RI signaling pathway              | conjunctivitis                    |
| path:04664 | Fc epsilon RI signaling pathway              | Influenza                         |
| path:04664 | Fc epsilon RI signaling pathway              | epistaxis                         |
| path:04664 | Fc epsilon RI signaling pathway              | upper respiratory tract infection |
| path:04664 | Fc epsilon RI signaling pathway              | peripheral neuropathy             |
| path:04664 | Fc epsilon RI signaling pathway              | Dyspepsia                         |
| path:04670 | Leukocyte transendothelial migration         | flushing                          |
| path:04672 | Intestinal immune network for IgA production | infection                         |
| path:04672 | Intestinal immune network for IgA production | fever                             |
| path:04672 | Intestinal immune network for IgA production | Pharyngitis                       |
| path:04672 | Intestinal immune network for IgA production | angioedema                        |
| path:04672 | Intestinal immune network for IgA production | edema                             |
| path:04672 | Intestinal immune network for IgA production | Dyspepsia                         |
| path:04720 | Long-term potentiation                       | postural hypotension              |
| path:04720 | Long-term potentiation                       | flushing                          |
| path:04720 | Long-term potentiation                       | dyskinesia                        |
| path:04720 | Long-term potentiation                       | gynecomastia                      |
| path:04720 | Long-term potentiation                       | nasal congestion                  |
| path:04722 | Neurotrophin signaling pathway               | exfoliative dermatitis            |
| path:04722 | Neurotrophin signaling pathway               | eosinophilia                      |
| path:04722 | Neurotrophin signaling pathway               | erythema multiforme               |
| path:04722 | Neurotrophin signaling pathway               | leukopenia                        |
| path:04722 | Neurotrophin signaling pathway               | gynecomastia                      |
| path:04722 | Neurotrophin signaling pathway               | pancytopenia                      |
| path:04722 | Neurotrophin signaling pathway               | anemia                            |
| path:04722 | Neurotrophin signaling pathway               | jaundice                          |
| path:04722 | Neurotrophin signaling pathway               | purpura                           |
| path:04722 | Neurotrophin signaling pathway               | peripheral neuropathy             |
| path:04730 | Long-term depression                         | gastrointestinal hemorrhage       |
| path:04730 | Long-term depression                         | shock                             |
| path:04730 | Long-term depression                         | nocturia                          |
| path:04742 | Taste transduction                           | dyskinesia                        |
| path:04742 | Taste transduction                           | increased sweating                |
| path:04742 | Taste transduction                           | impotence                         |
| path:04742 | Taste transduction                           | nystagmus                         |
| path:04742 | Taste transduction                           | dyspnea                           |
| path:04742 | Taste transduction                           | insomnia                          |
| path:04742 | Taste transduction                           | nervousness                       |
| path:04742 | Taste transduction                           | urinary retention                 |
| path:04742 | Taste transduction                           | lupus                             |
| path:04742 | Taste transduction                           | postural hypotension              |
| path:04742 | Taste transduction                           | syncope                           |
| path:04742 | Taste transduction                           | tremor                            |

|            |                                           |                                |
|------------|-------------------------------------------|--------------------------------|
| path:04742 | Taste transduction                        | bradycardia                    |
| path:04742 | Taste transduction                        | AV block                       |
| path:04742 | Taste transduction                        | ataxia                         |
| path:04742 | Taste transduction                        | cardiac arrest                 |
| path:04742 | Taste transduction                        | chest pain                     |
| path:04742 | Taste transduction                        | photophobia                    |
| path:04742 | Taste transduction                        | apnea                          |
| path:04742 | Taste transduction                        | somnolence                     |
| path:04742 | Taste transduction                        | paralysis                      |
| path:04742 | Taste transduction                        | amnesia                        |
| path:04742 | Taste transduction                        | shock                          |
| path:04742 | Taste transduction                        | psychosis                      |
| path:04810 | Regulation of actin cytoskeleton          | urinary retention              |
| path:04810 | Regulation of actin cytoskeleton          | gingivitis                     |
| path:04810 | Regulation of actin cytoskeleton          | breast enlargement             |
| path:04810 | Regulation of actin cytoskeleton          | tardive dyskinesia             |
| path:04810 | Regulation of actin cytoskeleton          | weight loss                    |
| path:04810 | Regulation of actin cytoskeleton          | alkaline phosphatase increased |
| path:04810 | Regulation of actin cytoskeleton          | gastroesophageal reflux        |
| path:04810 | Regulation of actin cytoskeleton          | galactorrhea                   |
| path:04810 | Regulation of actin cytoskeleton          | dyskinesia                     |
| path:04810 | Regulation of actin cytoskeleton          | amenorrhea                     |
| path:04810 | Regulation of actin cytoskeleton          | dysphagia                      |
| path:04810 | Regulation of actin cytoskeleton          | rhabdomyolysis                 |
| path:04810 | Regulation of actin cytoskeleton          | torticollis                    |
| path:04810 | Regulation of actin cytoskeleton          | priapism                       |
| path:04810 | Regulation of actin cytoskeleton          | increased salivation           |
| path:04810 | Regulation of actin cytoskeleton          | eosinophilia                   |
| path:04810 | Regulation of actin cytoskeleton          | blepharitis                    |
| path:04810 | Regulation of actin cytoskeleton          | gynecomastia                   |
| path:04810 | Regulation of actin cytoskeleton          | glycosuria                     |
| path:04810 | Regulation of actin cytoskeleton          | urinary urgency                |
| path:04810 | Regulation of actin cytoskeleton          | tachycardia                    |
| path:04810 | Regulation of actin cytoskeleton          | paralytic ileus                |
| path:04810 | Regulation of actin cytoskeleton          | delirium                       |
| path:04810 | Regulation of actin cytoskeleton          | constipation                   |
| path:04810 | Regulation of actin cytoskeleton          | Parkinson                      |
| path:04910 | Insulin signaling pathway                 | exfoliative dermatitis         |
| path:04910 | Insulin signaling pathway                 | gynecomastia                   |
| path:04912 | GnRH signaling pathway                    | postural hypotension           |
| path:04912 | GnRH signaling pathway                    | gynecomastia                   |
| path:04912 | GnRH signaling pathway                    | flushing                       |
| path:04912 | GnRH signaling pathway                    | paralytic ileus                |
| path:04914 | Progesterone-mediated oocyte maturation   | hypokalemia                    |
| path:04914 | Progesterone-mediated oocyte maturation   | pleural effusion               |
| path:04916 | Melanogenesis                             | nasal congestion               |
| path:04916 | Melanogenesis                             | lupus                          |
| path:04916 | Melanogenesis                             | gynecomastia                   |
| path:04920 | Adipocytokine signaling pathway           | neutropenia                    |
| path:04920 | Adipocytokine signaling pathway           | hepatitis                      |
| path:04930 | Type II diabetes mellitus                 | nocturia                       |
| path:04930 | Type II diabetes mellitus                 | hepatitis                      |
| path:04960 | Aldosterone-regulated sodium reabsorption | increased sweating             |
| path:04960 | Aldosterone-regulated sodium reabsorption | thrombocytopenia               |
| path:04960 | Aldosterone-regulated sodium reabsorption | diplopia                       |
| path:04960 | Aldosterone-regulated sodium reabsorption | jaundice                       |

|            |                                           |                            |
|------------|-------------------------------------------|----------------------------|
| path:04960 | Aldosterone-regulated sodium reabsorption | hyponatremia               |
| path:04960 | Aldosterone-regulated sodium reabsorption | hypoglycemia               |
| path:04960 | Aldosterone-regulated sodium reabsorption | shock                      |
| path:04960 | Aldosterone-regulated sodium reabsorption | paralysis                  |
| path:04960 | Aldosterone-regulated sodium reabsorption | glycosuria                 |
| path:04960 | Aldosterone-regulated sodium reabsorption | hepatic failure            |
| path:04960 | Aldosterone-regulated sodium reabsorption | hyperglycemia              |
| path:04960 | Aldosterone-regulated sodium reabsorption | albuminuria                |
| path:04970 | Salivary secretion                        | postural hypotension       |
| path:04970 | Salivary secretion                        | spasm                      |
| path:04970 | Salivary secretion                        | weakness                   |
| path:04970 | Salivary secretion                        | gynecomastia               |
| path:04970 | Salivary secretion                        | sore throat                |
| path:04970 | Salivary secretion                        | impotence                  |
| path:04970 | Salivary secretion                        | increased salivation       |
| path:04970 | Salivary secretion                        | paralytic ileus            |
| path:04970 | Salivary secretion                        | palpitations               |
| path:04970 | Salivary secretion                        | priapism                   |
| path:04970 | Salivary secretion                        | dry mouth                  |
| path:04970 | Salivary secretion                        | Parkinson                  |
| path:04970 | Salivary secretion                        | glycosuria                 |
| path:04970 | Salivary secretion                        | bradycardia                |
| path:04970 | Salivary secretion                        | nightmares                 |
| path:04970 | Salivary secretion                        | tardive dyskinesia         |
| path:04970 | Salivary secretion                        | lightheadedness            |
| path:04970 | Salivary secretion                        | nasal congestion           |
| path:04970 | Salivary secretion                        | urinary retention          |
| path:04970 | Salivary secretion                        | AV block                   |
| path:04970 | Salivary secretion                        | mental depression          |
| path:04970 | Salivary secretion                        | memory loss                |
| path:04970 | Salivary secretion                        | heart block                |
| path:04970 | Salivary secretion                        | tachycardia                |
| path:04970 | Salivary secretion                        | sweating                   |
| path:04970 | Salivary secretion                        | galactorrhea               |
| path:04971 | Gastric acid secretion                    | paralytic ileus            |
| path:04971 | Gastric acid secretion                    | Parkinson                  |
| path:04971 | Gastric acid secretion                    | tardive dyskinesia         |
| path:04971 | Gastric acid secretion                    | gynecomastia               |
| path:04971 | Gastric acid secretion                    | nasal congestion           |
| path:04972 | Pancreatic secretion                      | postural hypotension       |
| path:04972 | Pancreatic secretion                      | nasal congestion           |
| path:04974 | Protein digestion and absorption          | hyperuricemia              |
| path:04974 | Protein digestion and absorption          | Stevens – Johnson syndrome |
| path:04974 | Protein digestion and absorption          | hypersensitivity           |
| path:04974 | Protein digestion and absorption          | vasculitis                 |
| path:04974 | Protein digestion and absorption          | pancreatitis               |
| path:04974 | Protein digestion and absorption          | jaundice                   |
| path:04974 | Protein digestion and absorption          | hemolytic anemia           |
| path:05010 | Alzheimer's disease                       | leukopenia                 |
| path:05010 | Alzheimer's disease                       | hepatitis                  |
| path:05010 | Alzheimer's disease                       | angioedema                 |
| path:05010 | Alzheimer's disease                       | jaundice                   |
| path:05010 | Alzheimer's disease                       | gynecomastia               |
| path:05012 | Parkinson's disease                       | diarrhea                   |
| path:05012 | Parkinson's disease                       | tachycardia                |
| path:05012 | Parkinson's disease                       | agitation                  |

|            |                                                            |                            |
|------------|------------------------------------------------------------|----------------------------|
| path:05012 | Parkinson's disease                                        | impotence                  |
| path:05014 | Amyotrophic lateral sclerosis (ALS)                        | anorexia                   |
| path:05014 | Amyotrophic lateral sclerosis (ALS)                        | hepatic failure            |
| path:05014 | Amyotrophic lateral sclerosis (ALS)                        | stomatitis                 |
| path:05014 | Amyotrophic lateral sclerosis (ALS)                        | hyperkalemia               |
| path:05014 | Amyotrophic lateral sclerosis (ALS)                        | acute renal failure        |
| path:05014 | Amyotrophic lateral sclerosis (ALS)                        | leukopenia                 |
| path:05014 | Amyotrophic lateral sclerosis (ALS)                        | neuropathy                 |
| path:05014 | Amyotrophic lateral sclerosis (ALS)                        | sepsis                     |
| path:05014 | Amyotrophic lateral sclerosis (ALS)                        | nausea                     |
| path:05014 | Amyotrophic lateral sclerosis (ALS)                        | dyspnea                    |
| path:05014 | Amyotrophic lateral sclerosis (ALS)                        | constitutional symptoms    |
| path:05014 | Amyotrophic lateral sclerosis (ALS)                        | peripheral neuropathy      |
| path:05014 | Amyotrophic lateral sclerosis (ALS)                        | neutropenia                |
| path:05014 | Amyotrophic lateral sclerosis (ALS)                        | fever                      |
| path:05014 | Amyotrophic lateral sclerosis (ALS)                        | hypotension                |
| path:05014 | Amyotrophic lateral sclerosis (ALS)                        | seizures                   |
| path:05016 | Huntington's disease                                       | dyspnea                    |
| path:05016 | Huntington's disease                                       | anemia                     |
| path:05016 | Huntington's disease                                       | myocardial infarction      |
| path:05020 | Prion diseases                                             | epistaxis                  |
| path:05020 | Prion diseases                                             | anorexia                   |
| path:05020 | Prion diseases                                             | pancreatitis               |
| path:05020 | Prion diseases                                             | alopecia                   |
| path:05020 | Prion diseases                                             | dyspnea                    |
| path:05020 | Prion diseases                                             | edema                      |
| path:05020 | Prion diseases                                             | hematuria                  |
| path:05020 | Prion diseases                                             | congestive heart failure   |
| path:05020 | Prion diseases                                             | erythema multiforme        |
| path:05020 | Prion diseases                                             | infection                  |
| path:05020 | Prion diseases                                             | hemorrhage                 |
| path:05020 | Prion diseases                                             | stomatitis                 |
| path:05020 | Prion diseases                                             | arthralgia                 |
| path:05020 | Prion diseases                                             | anemia                     |
| path:05020 | Prion diseases                                             | peripheral neuropathy      |
| path:05020 | Prion diseases                                             | purpura                    |
| path:05020 | Prion diseases                                             | fever                      |
| path:05110 | Vibrio cholerae infection                                  | postural hypotension       |
| path:05120 | Epithelial cell signaling in Helicobacter pylori infection | hepatitis                  |
| path:05120 | Epithelial cell signaling in Helicobacter pylori infection | thrombocytopenia           |
| path:05120 | Epithelial cell signaling in Helicobacter pylori infection | sepsis                     |
| path:05120 | Epithelial cell signaling in Helicobacter pylori infection | pneumonia                  |
| path:05120 | Epithelial cell signaling in Helicobacter pylori infection | epistaxis                  |
| path:05120 | Epithelial cell signaling in Helicobacter pylori infection | cough                      |
| path:05120 | Epithelial cell signaling in Helicobacter pylori infection | hematuria                  |
| path:05120 | Epithelial cell signaling in Helicobacter pylori infection | dyspnea                    |
| path:05120 | Epithelial cell signaling in Helicobacter pylori infection | alopecia                   |
| path:05120 | Epithelial cell signaling in Helicobacter pylori infection | constitutional symptoms    |
| path:05120 | Epithelial cell signaling in Helicobacter pylori infection | anemia                     |
| path:05120 | Epithelial cell signaling in Helicobacter pylori infection | toxic epidermal necrolysis |
| path:05120 | Epithelial cell signaling in Helicobacter pylori infection | neuropathy                 |
| path:05120 | Epithelial cell signaling in Helicobacter pylori infection | dermatitis                 |
| path:05120 | Epithelial cell signaling in Helicobacter pylori infection | anaphylaxis                |
| path:05120 | Epithelial cell signaling in Helicobacter pylori infection | flushing                   |
| path:05120 | Epithelial cell signaling in Helicobacter pylori infection | asthenia                   |
| path:05120 | Epithelial cell signaling in Helicobacter pylori infection | neutropenia                |

|            |                                                            |                                   |
|------------|------------------------------------------------------------|-----------------------------------|
| path:05120 | Epithelial cell signaling in Helicobacter pylori infection | conjunctivitis                    |
| path:05120 | Epithelial cell signaling in Helicobacter pylori infection | diarrhea                          |
| path:05120 | Epithelial cell signaling in Helicobacter pylori infection | leukopenia                        |
| path:05120 | Epithelial cell signaling in Helicobacter pylori infection | abdominal pain                    |
| path:05120 | Epithelial cell signaling in Helicobacter pylori infection | upper respiratory tract infection |
| path:05120 | Epithelial cell signaling in Helicobacter pylori infection | hypokalemia                       |
| path:05120 | Epithelial cell signaling in Helicobacter pylori infection | gastrointestinal hemorrhage       |
| path:05120 | Epithelial cell signaling in Helicobacter pylori infection | Dyspepsia                         |
| path:05120 | Epithelial cell signaling in Helicobacter pylori infection | Pharyngitis                       |
| path:05120 | Epithelial cell signaling in Helicobacter pylori infection | chills                            |
| path:05120 | Epithelial cell signaling in Helicobacter pylori infection | pleural effusion                  |
| path:05120 | Epithelial cell signaling in Helicobacter pylori infection | erythema multiforme               |
| path:05120 | Epithelial cell signaling in Helicobacter pylori infection | chest pain                        |
| path:05120 | Epithelial cell signaling in Helicobacter pylori infection | malaise                           |
| path:05120 | Epithelial cell signaling in Helicobacter pylori infection | peripheral neuropathy             |
| path:05120 | Epithelial cell signaling in Helicobacter pylori infection | congestive heart failure          |
| path:05120 | Epithelial cell signaling in Helicobacter pylori infection | infection                         |
| path:05120 | Epithelial cell signaling in Helicobacter pylori infection | rash                              |
| path:05120 | Epithelial cell signaling in Helicobacter pylori infection | myalgia                           |
| path:05120 | Epithelial cell signaling in Helicobacter pylori infection | heart failure                     |
| path:05120 | Epithelial cell signaling in Helicobacter pylori infection | pancreatitis                      |
| path:05120 | Epithelial cell signaling in Helicobacter pylori infection | stomatitis                        |
| path:05120 | Epithelial cell signaling in Helicobacter pylori infection | anorexia                          |
| path:05120 | Epithelial cell signaling in Helicobacter pylori infection | hypersensitivity                  |
| path:05131 | Shigellosis                                                | abdominal pain                    |
| path:05131 | Shigellosis                                                | hematuria                         |
| path:05131 | Shigellosis                                                | vertigo                           |
| path:05131 | Shigellosis                                                | purpura                           |
| path:05131 | Shigellosis                                                | angioedema                        |
| path:05131 | Shigellosis                                                | Dyspepsia                         |
| path:05131 | Shigellosis                                                | anaphylaxis                       |
| path:05131 | Shigellosis                                                | conjunctivitis                    |
| path:05131 | Shigellosis                                                | anorexia                          |
| path:05131 | Shigellosis                                                | dyspnea                           |
| path:05131 | Shigellosis                                                | malaise                           |
| path:05131 | Shigellosis                                                | edema                             |
| path:05131 | Shigellosis                                                | hepatitis                         |
| path:05131 | Shigellosis                                                | fever                             |
| path:05131 | Shigellosis                                                | epistaxis                         |
| path:05131 | Shigellosis                                                | pancreatitis                      |
| path:05131 | Shigellosis                                                | alopecia                          |
| path:05131 | Shigellosis                                                | anemia                            |
| path:05131 | Shigellosis                                                | jaundice                          |
| path:05131 | Shigellosis                                                | flushing                          |
| path:05140 | Leishmaniasis                                              | rectal hemorrhage                 |
| path:05140 | Leishmaniasis                                              | sepsis                            |
| path:05140 | Leishmaniasis                                              | gastroenteritis                   |
| path:05140 | Leishmaniasis                                              | glossitis                         |
| path:05140 | Leishmaniasis                                              | toxic epidermal necrolysis        |
| path:05140 | Leishmaniasis                                              | purpura                           |
| path:05140 | Leishmaniasis                                              | cystitis                          |
| path:05140 | Leishmaniasis                                              | lymphadenopathy                   |
| path:05140 | Leishmaniasis                                              | pruritus                          |
| path:05140 | Leishmaniasis                                              | melena                            |
| path:05140 | Leishmaniasis                                              | thrombocytopenia                  |
| path:05140 | Leishmaniasis                                              | hepatitis                         |

|            |               |                             |
|------------|---------------|-----------------------------|
| path:05140 | Leishmaniasis | anxiety                     |
| path:05140 | Leishmaniasis | dyspnea                     |
| path:05140 | Leishmaniasis | gastrointestinal hemorrhage |
| path:05140 | Leishmaniasis | Dyspepsia                   |
| path:05140 | Leishmaniasis | anemia                      |
| path:05140 | Leishmaniasis | hemorrhage                  |
| path:05140 | Leishmaniasis | malaise                     |
| path:05140 | Leishmaniasis | anorexia                    |
| path:05140 | Leishmaniasis | gastritis                   |
| path:05140 | Leishmaniasis | aplastic anemia             |
| path:05140 | Leishmaniasis | renal failure               |
| path:05140 | Leishmaniasis | myocardial infarction       |
| path:05140 | Leishmaniasis | vasculitis                  |
| path:05140 | Leishmaniasis | insomnia                    |
| path:05140 | Leishmaniasis | eructation                  |
| path:05140 | Leishmaniasis | edema                       |
| path:05140 | Leishmaniasis | agranulocytosis             |
| path:05140 | Leishmaniasis | hepatic failure             |
| path:05140 | Leishmaniasis | hypersensitivity            |
| path:05140 | Leishmaniasis | Stevens – Johnson syndrome  |
| path:05140 | Leishmaniasis | pancreatitis                |
| path:05140 | Leishmaniasis | acute renal failure         |
| path:05140 | Leishmaniasis | erythema multiforme         |
| path:05140 | Leishmaniasis | photosensitivity            |
| path:05140 | Leishmaniasis | hematemesis                 |
| path:05140 | Leishmaniasis | epistaxis                   |
| path:05140 | Leishmaniasis | esophagitis                 |
| path:05140 | Leishmaniasis | herpes simplex              |
| path:05140 | Leishmaniasis | heartburn                   |
| path:05140 | Leishmaniasis | colitis                     |
| path:05140 | Leishmaniasis | pancytopenia                |
| path:05140 | Leishmaniasis | hearing loss                |
| path:05140 | Leishmaniasis | abdominal pain              |
| path:05140 | Leishmaniasis | hyperkalemia                |
| path:05140 | Leishmaniasis | exfoliative dermatitis      |
| path:05140 | Leishmaniasis | hyperglycemia               |
| path:05140 | Leishmaniasis | stomatitis                  |
| path:05140 | Leishmaniasis | cellulitis                  |
| path:05140 | Leishmaniasis | peptic ulcer                |
| path:05140 | Leishmaniasis | infection                   |
| path:05140 | Leishmaniasis | fever                       |
| path:05140 | Leishmaniasis | tremor                      |
| path:05140 | Leishmaniasis | vertigo                     |
| path:05140 | Leishmaniasis | proteinuria                 |
| path:05140 | Leishmaniasis | hemolytic anemia            |
| path:05140 | Leishmaniasis | dysuria                     |
| path:05140 | Leishmaniasis | ecchymosis                  |
| path:05140 | Leishmaniasis | hematuria                   |
| path:05140 | Leishmaniasis | anaphylaxis                 |
| path:05140 | Leishmaniasis | congestive heart failure    |
| path:05140 | Leishmaniasis | eczema                      |
| path:05140 | Leishmaniasis | flatulence                  |
| path:05140 | Leishmaniasis | asthma                      |
| path:05140 | Leishmaniasis | angioedema                  |
| path:05140 | Leishmaniasis | conjunctivitis              |
| path:05140 | Leishmaniasis | pneumonia                   |

|            |                |                                   |
|------------|----------------|-----------------------------------|
| path:05140 | Leishmaniasis  | jaundice                          |
| path:05140 | Leishmaniasis  | interstitial nephritis            |
| path:05140 | Leishmaniasis  | ulcer                             |
| path:05140 | Leishmaniasis  | eosinophilia                      |
| path:05140 | Leishmaniasis  | alopecia                          |
| path:05140 | Leishmaniasis  | palpitations                      |
| path:05140 | Leishmaniasis  | tinnitus                          |
| path:05142 | Chagas disease | proteinuria                       |
| path:05142 | Chagas disease | muscle cramps                     |
| path:05142 | Chagas disease | bronchitis                        |
| path:05142 | Chagas disease | hypoglycemia                      |
| path:05142 | Chagas disease | cough                             |
| path:05142 | Chagas disease | arrhythmia                        |
| path:05142 | Chagas disease | hemolytic anemia                  |
| path:05142 | Chagas disease | chest pain                        |
| path:05142 | Chagas disease | arthritis                         |
| path:05142 | Chagas disease | gout                              |
| path:05142 | Chagas disease | hyponatremia                      |
| path:05142 | Chagas disease | pancreatitis                      |
| path:05142 | Chagas disease | palpitations                      |
| path:05142 | Chagas disease | neutropenia                       |
| path:05142 | Chagas disease | conjunctivitis                    |
| path:05142 | Chagas disease | pneumonia                         |
| path:05142 | Chagas disease | hyperkalemia                      |
| path:05142 | Chagas disease | epistaxis                         |
| path:05142 | Chagas disease | hypotension                       |
| path:05142 | Chagas disease | Dyspepsia                         |
| path:05142 | Chagas disease | acute renal failure               |
| path:05142 | Chagas disease | flushing                          |
| path:05142 | Chagas disease | angina pectoris                   |
| path:05142 | Chagas disease | abdominal pain                    |
| path:05142 | Chagas disease | malaise                           |
| path:05142 | Chagas disease | rhinitis                          |
| path:05142 | Chagas disease | upper respiratory tract infection |
| path:05142 | Chagas disease | Influenza                         |
| path:05142 | Chagas disease | Sinusitis                         |
| path:05142 | Chagas disease | anemia                            |
| path:05142 | Chagas disease | hepatitis                         |
| path:05142 | Chagas disease | dyspnea                           |
| path:05142 | Chagas disease | gastroenteritis                   |
| path:05142 | Chagas disease | toxic epidermal necrolysis        |
| path:05144 | Malaria        | abdominal pain                    |
| path:05144 | Malaria        | peripheral neuropathy             |
| path:05144 | Malaria        | ulcer                             |
| path:05144 | Malaria        | hypersensitivity                  |
| path:05144 | Malaria        | flatulence                        |
| path:05144 | Malaria        | eczema                            |
| path:05144 | Malaria        | infection                         |
| path:05144 | Malaria        | purpura                           |
| path:05144 | Malaria        | Dyspepsia                         |
| path:05145 | Toxoplasmosis  | pleural effusion                  |
| path:05145 | Toxoplasmosis  | atrial fibrillation               |
| path:05145 | Toxoplasmosis  | toxic epidermal necrolysis        |
| path:05145 | Toxoplasmosis  | esophagitis                       |
| path:05145 | Toxoplasmosis  | neutropenia                       |
| path:05145 | Toxoplasmosis  | dehydration                       |



|            |                    |                                   |
|------------|--------------------|-----------------------------------|
| path:05145 | Toxoplasmosis      | jaundice                          |
| path:05145 | Toxoplasmosis      | epistaxis                         |
| path:05145 | Toxoplasmosis      | gastroenteritis                   |
| path:05145 | Toxoplasmosis      | conjunctivitis                    |
| path:05145 | Toxoplasmosis      | arthralgia                        |
| path:05145 | Toxoplasmosis      | sepsis                            |
| path:05145 | Toxoplasmosis      | leukopenia                        |
| path:05145 | Toxoplasmosis      | thrombocytopenia                  |
| path:05145 | Toxoplasmosis      | ecchymosis                        |
| path:05145 | Toxoplasmosis      | hematuria                         |
| path:05145 | Toxoplasmosis      | alopecia                          |
| path:05145 | Toxoplasmosis      | pneumonia                         |
| path:05145 | Toxoplasmosis      | herpes simplex                    |
| path:05145 | Toxoplasmosis      | abdominal pain                    |
| path:05145 | Toxoplasmosis      | hypersensitivity                  |
| path:05145 | Toxoplasmosis      | ulcer                             |
| path:05145 | Toxoplasmosis      | pancytopenia                      |
| path:05145 | Toxoplasmosis      | stomatitis                        |
| path:05145 | Toxoplasmosis      | gastritis                         |
| path:05145 | Toxoplasmosis      | urinary tract infection           |
| path:05145 | Toxoplasmosis      | anorexia                          |
| path:05145 | Toxoplasmosis      | erythema                          |
| path:05145 | Toxoplasmosis      | gastrointestinal hemorrhage       |
| path:05145 | Toxoplasmosis      | neuropathy                        |
| path:05145 | Toxoplasmosis      | congestive heart failure          |
| path:05145 | Toxoplasmosis      | infection                         |
| path:05145 | Toxoplasmosis      | heart failure                     |
| path:05145 | Toxoplasmosis      | hypokalemia                       |
| path:05145 | Toxoplasmosis      | upper respiratory tract infection |
| path:05145 | Toxoplasmosis      | weight loss                       |
| path:05145 | Toxoplasmosis      | hepatitis                         |
| path:05145 | Toxoplasmosis      | pancreatitis                      |
| path:05145 | Toxoplasmosis      | dermatitis                        |
| path:05145 | Toxoplasmosis      | anemia                            |
| path:05145 | Toxoplasmosis      | pruritus                          |
| path:05145 | Toxoplasmosis      | fever                             |
| path:05145 | Toxoplasmosis      | peripheral neuropathy             |
| path:05146 | Amoebiasis         | flushing                          |
| path:05146 | Amoebiasis         | upper respiratory tract infection |
| path:05146 | Amoebiasis         | hypokalemia                       |
| path:05146 | Amoebiasis         | pulmonary edema                   |
| path:05146 | Amoebiasis         | proteinuria                       |
| path:05160 | Hepatitis C        | arthritis                         |
| path:05160 | Hepatitis C        | neutropenia                       |
| path:05160 | Hepatitis C        | pancreatitis                      |
| path:05160 | Hepatitis C        | fever                             |
| path:05160 | Hepatitis C        | anorexia                          |
| path:05160 | Hepatitis C        | stomatitis                        |
| path:05160 | Hepatitis C        | abdominal pain                    |
| path:05160 | Hepatitis C        | dyspnea                           |
| path:05160 | Hepatitis C        | infection                         |
| path:05160 | Hepatitis C        | alopecia                          |
| path:05200 | Pathways in cancer | erythema multiforme               |
| path:05200 | Pathways in cancer | pancreatitis                      |
| path:05200 | Pathways in cancer | conjunctivitis                    |
| path:05200 | Pathways in cancer | pleural effusion                  |

|            |                    |                             |
|------------|--------------------|-----------------------------|
| path:05200 | Pathways in cancer | hematemesis                 |
| path:05200 | Pathways in cancer | interstitial nephritis      |
| path:05200 | Pathways in cancer | pneumonia                   |
| path:05200 | Pathways in cancer | alopecia                    |
| path:05200 | Pathways in cancer | weight loss                 |
| path:05200 | Pathways in cancer | congestive heart failure    |
| path:05200 | Pathways in cancer | Stevens – Johnson syndrome  |
| path:05200 | Pathways in cancer | hepatic failure             |
| path:05200 | Pathways in cancer | interstitial pneumonitis    |
| path:05200 | Pathways in cancer | erythema                    |
| path:05200 | Pathways in cancer | edema                       |
| path:05200 | Pathways in cancer | renal failure               |
| path:05200 | Pathways in cancer | hypersensitivity            |
| path:05200 | Pathways in cancer | dyspnea                     |
| path:05200 | Pathways in cancer | pulmonary edema             |
| path:05200 | Pathways in cancer | toxic epidermal necrolysis  |
| path:05200 | Pathways in cancer | anorexia                    |
| path:05200 | Pathways in cancer | anemia                      |
| path:05200 | Pathways in cancer | infection                   |
| path:05200 | Pathways in cancer | fever                       |
| path:05200 | Pathways in cancer | gastrointestinal hemorrhage |
| path:05200 | Pathways in cancer | exfoliative dermatitis      |
| path:05200 | Pathways in cancer | Dyspepsia                   |
| path:05200 | Pathways in cancer | hypokalemia                 |
| path:05200 | Pathways in cancer | rectal hemorrhage           |
| path:05200 | Pathways in cancer | dry skin                    |
| path:05200 | Pathways in cancer | peripheral edema            |
| path:05200 | Pathways in cancer | melen                       |
| path:05200 | Pathways in cancer | cancer                      |
| path:05200 | Pathways in cancer | ulcer                       |
| path:05200 | Pathways in cancer | hearing loss                |
| path:05200 | Pathways in cancer | vasculitis                  |
| path:05200 | Pathways in cancer | gastritis                   |
| path:05200 | Pathways in cancer | asthenia                    |
| path:05200 | Pathways in cancer | thrombocytopenia            |
| path:05200 | Pathways in cancer | constitutional symptoms     |
| path:05200 | Pathways in cancer | hematuria                   |
| path:05200 | Pathways in cancer | leukopenia                  |
| path:05200 | Pathways in cancer | stomatitis                  |
| path:05200 | Pathways in cancer | peripheral neuropathy       |
| path:05200 | Pathways in cancer | neutropenia                 |
| path:05200 | Pathways in cancer | SGOT increased              |
| path:05200 | Pathways in cancer | sepsis                      |
| path:05200 | Pathways in cancer | proteinuria                 |
| path:05200 | Pathways in cancer | hemorrhage                  |
| path:05200 | Pathways in cancer | aplastic anemia             |
| path:05210 | Colorectal cancer  | asthenia                    |
| path:05210 | Colorectal cancer  | infection                   |
| path:05210 | Colorectal cancer  | heart failure               |
| path:05210 | Colorectal cancer  | peripheral neuropathy       |
| path:05210 | Colorectal cancer  | stomatitis                  |
| path:05210 | Colorectal cancer  | toxic epidermal necrolysis  |
| path:05210 | Colorectal cancer  | chills                      |
| path:05210 | Colorectal cancer  | fever                       |
| path:05210 | Colorectal cancer  | Stevens – Johnson syndrome  |
| path:05210 | Colorectal cancer  | constipation                |

|            |                      |                             |
|------------|----------------------|-----------------------------|
| path:05210 | Colorectal cancer    | hemorrhage                  |
| path:05210 | Colorectal cancer    | dyspnea                     |
| path:05210 | Colorectal cancer    | erythema multiforme         |
| path:05210 | Colorectal cancer    | leukopenia                  |
| path:05210 | Colorectal cancer    | weakness                    |
| path:05210 | Colorectal cancer    | anorexia                    |
| path:05210 | Colorectal cancer    | neuropathy                  |
| path:05210 | Colorectal cancer    | neutropenia                 |
| path:05210 | Colorectal cancer    | thrombocytopenia            |
| path:05210 | Colorectal cancer    | cough                       |
| path:05210 | Colorectal cancer    | anemia                      |
| path:05210 | Colorectal cancer    | hypersensitivity            |
| path:05210 | Colorectal cancer    | gastrointestinal hemorrhage |
| path:05210 | Colorectal cancer    | alopecia                    |
| path:05210 | Colorectal cancer    | renal failure               |
| path:05210 | Colorectal cancer    | malaise                     |
| path:05210 | Colorectal cancer    | myalgia                     |
| path:05210 | Colorectal cancer    | congestive heart failure    |
| path:05210 | Colorectal cancer    | constitutional symptoms     |
| path:05211 | Renal cell carcinoma | anemia                      |
| path:05211 | Renal cell carcinoma | infection                   |
| path:05211 | Renal cell carcinoma | Dyspepsia                   |
| path:05211 | Renal cell carcinoma | hypertension                |
| path:05211 | Renal cell carcinoma | asthenia                    |
| path:05211 | Renal cell carcinoma | leukopenia                  |
| path:05211 | Renal cell carcinoma | erythema multiforme         |
| path:05211 | Renal cell carcinoma | arthralgia                  |
| path:05211 | Renal cell carcinoma | pancreatitis                |
| path:05211 | Renal cell carcinoma | dyspnea                     |
| path:05211 | Renal cell carcinoma | Sinusitis                   |
| path:05211 | Renal cell carcinoma | alopecia                    |
| path:05211 | Renal cell carcinoma | asthenia                    |
| path:05212 | Pancreatic cancer    | weight loss                 |
| path:05212 | Pancreatic cancer    | stomatitis                  |
| path:05212 | Pancreatic cancer    | hemorrhage                  |
| path:05212 | Pancreatic cancer    | alopecia                    |
| path:05212 | Pancreatic cancer    | arthritis                   |
| path:05212 | Pancreatic cancer    | arthralgia                  |
| path:05212 | Pancreatic cancer    | anorexia                    |
| path:05212 | Pancreatic cancer    | anemia                      |
| path:05212 | Pancreatic cancer    | congestive heart failure    |
| path:05212 | Pancreatic cancer    | malaise                     |
| path:05212 | Pancreatic cancer    | leukopenia                  |
| path:05212 | Pancreatic cancer    | cough                       |
| path:05212 | Pancreatic cancer    | constitutional symptoms     |
| path:05212 | Pancreatic cancer    | pancreatitis                |
| path:05212 | Pancreatic cancer    | myalgia                     |
| path:05212 | Pancreatic cancer    | edema                       |
| path:05212 | Pancreatic cancer    | dyspnea                     |
| path:05212 | Pancreatic cancer    | thrombocytopenia            |
| path:05212 | Pancreatic cancer    | infection                   |
| path:05212 | Pancreatic cancer    | fatigue                     |
| path:05212 | Pancreatic cancer    | fever                       |
| path:05213 | Endometrial cancer   | leukopenia                  |
| path:05213 | Endometrial cancer   | Vascular Disorders          |
| path:05213 | Endometrial cancer   | erythema                    |

|            |                    |                          |
|------------|--------------------|--------------------------|
| path:05213 | Endometrial cancer | pancreatitis             |
| path:05213 | Endometrial cancer | weight loss              |
| path:05213 | Endometrial cancer | asthenia                 |
| path:05213 | Endometrial cancer | cough                    |
| path:05213 | Endometrial cancer | constitutional symptoms  |
| path:05213 | Endometrial cancer | stomatitis               |
| path:05213 | Endometrial cancer | pain                     |
| path:05213 | Endometrial cancer | alopecia                 |
| path:05213 | Endometrial cancer | anorexia                 |
| path:05213 | Endometrial cancer | anemia                   |
| path:05213 | Endometrial cancer | dermatitis               |
| path:05213 | Endometrial cancer | infection                |
| path:05213 | Endometrial cancer | dyspnea                  |
| path:05213 | Endometrial cancer | neutropenia              |
| path:05213 | Endometrial cancer | neuropathy               |
| path:05213 | Endometrial cancer | hemorrhage               |
| path:05213 | Endometrial cancer | flushing                 |
| path:05213 | Endometrial cancer | congestive heart failure |
| path:05213 | Endometrial cancer | peripheral edema         |
| path:05214 | Glioma             | neutropenia              |
| path:05214 | Glioma             | stomatitis               |
| path:05214 | Glioma             | leukopenia               |
| path:05214 | Glioma             | erythema                 |
| path:05214 | Glioma             | gynecomastia             |
| path:05214 | Glioma             | constitutional symptoms  |
| path:05214 | Glioma             | anemia                   |
| path:05214 | Glioma             | peripheral neuropathy    |
| path:05214 | Glioma             | lupus                    |
| path:05214 | Glioma             | congestive heart failure |
| path:05215 | Prostate cancer    | leukopenia               |
| path:05215 | Prostate cancer    | anorexia                 |
| path:05215 | Prostate cancer    | cancer                   |
| path:05215 | Prostate cancer    | anemia                   |
| path:05215 | Prostate cancer    | edema                    |
| path:05215 | Prostate cancer    | neutropenia              |
| path:05215 | Prostate cancer    | stomatitis               |
| path:05215 | Prostate cancer    | dyspnea                  |
| path:05215 | Prostate cancer    | constitutional symptoms  |
| path:05215 | Prostate cancer    | congestive heart failure |
| path:05215 | Prostate cancer    | pleural effusion         |
| path:05216 | Thyroid cancer     | infection                |
| path:05216 | Thyroid cancer     | hypersensitivity         |
| path:05216 | Thyroid cancer     | stomatitis               |
| path:05216 | Thyroid cancer     | edema                    |
| path:05216 | Thyroid cancer     | leukopenia               |
| path:05216 | Thyroid cancer     | peripheral edema         |
| path:05216 | Thyroid cancer     | anemia                   |
| path:05216 | Thyroid cancer     | neutropenia              |
| path:05216 | Thyroid cancer     | erythema                 |
| path:05216 | Thyroid cancer     | hemorrhage               |
| path:05216 | Thyroid cancer     | constitutional symptoms  |
| path:05216 | Thyroid cancer     | dermatitis               |
| path:05216 | Thyroid cancer     | pancreatitis             |
| path:05216 | Thyroid cancer     | dyspnea                  |
| path:05216 | Thyroid cancer     | pain                     |
| path:05216 | Thyroid cancer     | asthenia                 |

|            |                          |                            |
|------------|--------------------------|----------------------------|
| path:05216 | Thyroid cancer           | anorexia                   |
| path:05216 | Thyroid cancer           | congestive heart failure   |
| path:05218 | Melanoma                 | stomatitis                 |
| path:05218 | Melanoma                 | leukopenia                 |
| path:05218 | Melanoma                 | infection                  |
| path:05218 | Melanoma                 | congestive heart failure   |
| path:05218 | Melanoma                 | dyspnea                    |
| path:05218 | Melanoma                 | asthenia                   |
| path:05218 | Melanoma                 | anemia                     |
| path:05218 | Melanoma                 | pancreatitis               |
| path:05218 | Melanoma                 | neutropenia                |
| path:05218 | Melanoma                 | fever                      |
| path:05218 | Melanoma                 | pain                       |
| path:05218 | Melanoma                 | hemorrhage                 |
| path:05218 | Melanoma                 | cough                      |
| path:05218 | Melanoma                 | constitutional symptoms    |
| path:05218 | Melanoma                 | anorexia                   |
| path:05219 | Bladder cancer           | dyspnea                    |
| path:05219 | Bladder cancer           | vomiting                   |
| path:05219 | Bladder cancer           | dermatitis                 |
| path:05219 | Bladder cancer           | Dyspepsia                  |
| path:05219 | Bladder cancer           | stomatitis                 |
| path:05219 | Bladder cancer           | malaise                    |
| path:05219 | Bladder cancer           | anemia                     |
| path:05219 | Bladder cancer           | rash                       |
| path:05219 | Bladder cancer           | hemorrhage                 |
| path:05219 | Bladder cancer           | flushing                   |
| path:05219 | Bladder cancer           | myalgia                    |
| path:05219 | Bladder cancer           | constitutional symptoms    |
| path:05219 | Bladder cancer           | erythema multiforme        |
| path:05219 | Bladder cancer           | pleural effusion           |
| path:05219 | Bladder cancer           | congestive heart failure   |
| path:05219 | Bladder cancer           | fever                      |
| path:05219 | Bladder cancer           | Vascular Disorders         |
| path:05219 | Bladder cancer           | abdominal pain             |
| path:05219 | Bladder cancer           | pancreatitis               |
| path:05219 | Bladder cancer           | anorexia                   |
| path:05219 | Bladder cancer           | asthenia                   |
| path:05219 | Bladder cancer           | hypersensitivity           |
| path:05219 | Bladder cancer           | Stevens – Johnson syndrome |
| path:05219 | Bladder cancer           | viral infection            |
| path:05219 | Bladder cancer           | infection                  |
| path:05219 | Bladder cancer           | peripheral neuropathy      |
| path:05219 | Bladder cancer           | fatigue                    |
| path:05219 | Bladder cancer           | heart failure              |
| path:05219 | Bladder cancer           | alopecia                   |
| path:05219 | Bladder cancer           | pulmonary edema            |
| path:05219 | Bladder cancer           | neuropathy                 |
| path:05219 | Bladder cancer           | leukopenia                 |
| path:05219 | Bladder cancer           | toxic epidermal necrolysis |
| path:05219 | Bladder cancer           | epistaxis                  |
| path:05219 | Bladder cancer           | exfoliative dermatitis     |
| path:05220 | Chronic myeloid leukemia | asthenia                   |
| path:05220 | Chronic myeloid leukemia | anorexia                   |
| path:05220 | Chronic myeloid leukemia | anemia                     |
| path:05220 | Chronic myeloid leukemia | dyspnea                    |

|            |                          |                             |
|------------|--------------------------|-----------------------------|
| path:05220 | Chronic myeloid leukemia | fever                       |
| path:05220 | Chronic myeloid leukemia | neutropenia                 |
| path:05220 | Chronic myeloid leukemia | pancreatitis                |
| path:05220 | Chronic myeloid leukemia | stomatitis                  |
| path:05221 | Acute myeloid leukemia   | anemia                      |
| path:05221 | Acute myeloid leukemia   | dyspnea                     |
| path:05221 | Acute myeloid leukemia   | hemorrhage                  |
| path:05222 | Small cell lung cancer   | esophagitis                 |
| path:05222 | Small cell lung cancer   | exfoliative dermatitis      |
| path:05222 | Small cell lung cancer   | hepatic failure             |
| path:05222 | Small cell lung cancer   | erythema multiforme         |
| path:05222 | Small cell lung cancer   | dysuria                     |
| path:05222 | Small cell lung cancer   | alopecia                    |
| path:05222 | Small cell lung cancer   | thrombocytopenia            |
| path:05222 | Small cell lung cancer   | flatulence                  |
| path:05222 | Small cell lung cancer   | interstitial nephritis      |
| path:05222 | Small cell lung cancer   | gastritis                   |
| path:05222 | Small cell lung cancer   | dyspnea                     |
| path:05222 | Small cell lung cancer   | anaphylaxis                 |
| path:05222 | Small cell lung cancer   | Stevens – Johnson syndrome  |
| path:05222 | Small cell lung cancer   | hemorrhage                  |
| path:05222 | Small cell lung cancer   | eructation                  |
| path:05222 | Small cell lung cancer   | stomatitis                  |
| path:05222 | Small cell lung cancer   | sepsis                      |
| path:05222 | Small cell lung cancer   | tinnitus                    |
| path:05222 | Small cell lung cancer   | agranulocytosis             |
| path:05222 | Small cell lung cancer   | ecchymosis                  |
| path:05222 | Small cell lung cancer   | asthenia                    |
| path:05222 | Small cell lung cancer   | pneumonia                   |
| path:05222 | Small cell lung cancer   | hematemesis                 |
| path:05222 | Small cell lung cancer   | hepatitis                   |
| path:05222 | Small cell lung cancer   | leukopenia                  |
| path:05222 | Small cell lung cancer   | coma                        |
| path:05222 | Small cell lung cancer   | nephrotic syndrome          |
| path:05222 | Small cell lung cancer   | gastrointestinal hemorrhage |
| path:05222 | Small cell lung cancer   | gastroenteritis             |
| path:05222 | Small cell lung cancer   | toxic epidermal necrolysis  |
| path:05222 | Small cell lung cancer   | pancreatitis                |
| path:05222 | Small cell lung cancer   | herpes simplex              |
| path:05222 | Small cell lung cancer   | hemolytic anemia            |
| path:05222 | Small cell lung cancer   | hypertension                |
| path:05222 | Small cell lung cancer   | aplastic anemia             |
| path:05222 | Small cell lung cancer   | proteinuria                 |
| path:05222 | Small cell lung cancer   | cystitis                    |
| path:05222 | Small cell lung cancer   | congestive heart failure    |
| path:05222 | Small cell lung cancer   | ulcer                       |
| path:05222 | Small cell lung cancer   | renal failure               |
| path:05222 | Small cell lung cancer   | hypercholesterolemia        |
| path:05222 | Small cell lung cancer   | anemia                      |
| path:05222 | Small cell lung cancer   | hypersensitivity            |
| path:05222 | Small cell lung cancer   | hematuria                   |
| path:05222 | Small cell lung cancer   | peptic ulcer                |
| path:05222 | Small cell lung cancer   | hyperkalemia                |
| path:05222 | Small cell lung cancer   | pulmonary edema             |
| path:05222 | Small cell lung cancer   | lymphadenopathy             |
| path:05222 | Small cell lung cancer   | angioedema                  |

|            |                                                        |                                   |
|------------|--------------------------------------------------------|-----------------------------------|
| path:05222 | Small cell lung cancer                                 | Dyspepsia                         |
| path:05222 | Small cell lung cancer                                 | rectal hemorrhage                 |
| path:05222 | Small cell lung cancer                                 | pancytopenia                      |
| path:05222 | Small cell lung cancer                                 | colitis                           |
| path:05222 | Small cell lung cancer                                 | melena                            |
| path:05222 | Small cell lung cancer                                 | hearing loss                      |
| path:05222 | Small cell lung cancer                                 | vasculitis                        |
| path:05223 | Non-small cell lung cancer                             | pleural effusion                  |
| path:05223 | Non-small cell lung cancer                             | congestive heart failure          |
| path:05223 | Non-small cell lung cancer                             | stomatitis                        |
| path:05223 | Non-small cell lung cancer                             | erythema                          |
| path:05223 | Non-small cell lung cancer                             | anemia                            |
| path:05223 | Non-small cell lung cancer                             | infection                         |
| path:05223 | Non-small cell lung cancer                             | neutropenia                       |
| path:05223 | Non-small cell lung cancer                             | dyspnea                           |
| path:05223 | Non-small cell lung cancer                             | dermatitis                        |
| path:05223 | Non-small cell lung cancer                             | hemorrhage                        |
| path:05223 | Non-small cell lung cancer                             | constitutional symptoms           |
| path:05223 | Non-small cell lung cancer                             | neuropathy                        |
| path:05310 | Asthma                                                 | Sinusitis                         |
| path:05310 | Asthma                                                 | upper respiratory tract infection |
| path:05310 | Asthma                                                 | Pharyngitis                       |
| path:05310 | Asthma                                                 | fever                             |
| path:05310 | Asthma                                                 | bronchitis                        |
| path:05320 | Autoimmune thyroid disease                             | fever                             |
| path:05320 | Autoimmune thyroid disease                             | edema                             |
| path:05322 | Systemic lupus erythematosus                           | anorexia                          |
| path:05330 | Allograft rejection                                    | abdominal pain                    |
| path:05330 | Allograft rejection                                    | bronchitis                        |
| path:05330 | Allograft rejection                                    | hypersensitivity                  |
| path:05330 | Allograft rejection                                    | fever                             |
| path:05330 | Allograft rejection                                    | Dyspepsia                         |
| path:05330 | Allograft rejection                                    | conjunctivitis                    |
| path:05330 | Allograft rejection                                    | Pharyngitis                       |
| path:05330 | Allograft rejection                                    | infection                         |
| path:05330 | Allograft rejection                                    | epistaxis                         |
| path:05330 | Allograft rejection                                    | Sinusitis                         |
| path:05330 | Allograft rejection                                    | upper respiratory tract infection |
| path:05332 | Graft-versus-host disease                              | infection                         |
| path:05332 | Graft-versus-host disease                              | hemorrhage                        |
| path:05332 | Graft-versus-host disease                              | malaise                           |
| path:05332 | Graft-versus-host disease                              | fever                             |
| path:05332 | Graft-versus-host disease                              | anemia                            |
| path:05332 | Graft-versus-host disease                              | anorexia                          |
| path:05410 | Hypertrophic cardiomyopathy (HCM)                      | hemolytic anemia                  |
| path:05410 | Hypertrophic cardiomyopathy (HCM)                      | flushing                          |
| path:05410 | Hypertrophic cardiomyopathy (HCM)                      | cerebrovascular accident          |
| path:05410 | Hypertrophic cardiomyopathy (HCM)                      | hyponatremia                      |
| path:05410 | Hypertrophic cardiomyopathy (HCM)                      | muscle cramps                     |
| path:05410 | Hypertrophic cardiomyopathy (HCM)                      | hepatitis                         |
| path:05410 | Hypertrophic cardiomyopathy (HCM)                      | Stevens - Johnson syndrome        |
| path:05412 | Arrhythmogenic right ventricular cardiomyopathy (ARVC) | gastrointestinal hemorrhage       |
| path:05414 | Dilated cardiomyopathy                                 | mental depression                 |
| path:05414 | Dilated cardiomyopathy                                 | shortness of breath               |
| path:05414 | Dilated cardiomyopathy                                 | AV block                          |
| path:05414 | Dilated cardiomyopathy                                 | postural hypotension              |

|            |                        |                  |
|------------|------------------------|------------------|
| path:05414 | Dilated cardiomyopathy | muscle cramps    |
| path:05414 | Dilated cardiomyopathy | bradycardia      |
| path:05414 | Dilated cardiomyopathy | nasal congestion |
| path:05416 | Viral myocarditis      | leukopenia       |
| path:05416 | Viral myocarditis      | flushing         |
| path:05416 | Viral myocarditis      | cough            |
| path:05416 | Viral myocarditis      | infection        |
| path:05416 | Viral myocarditis      | anemia           |
| path:05416 | Viral myocarditis      | stomatitis       |
| path:05416 | Viral myocarditis      | dyspnea          |
| path:05416 | Viral myocarditis      | headache         |
| path:05416 | Viral myocarditis      | anorexia         |
| path:05416 | Viral myocarditis      | myalgia          |
| path:05416 | Viral myocarditis      | dermatitis       |
| path:05416 | Viral myocarditis      | hematuria        |
| path:05416 | Viral myocarditis      | hypersensitivity |



Dataset S2. The ADR-ADR network

| ADR            | ADR                               |
|----------------|-----------------------------------|
| abdominal pain | epistaxis                         |
| abdominal pain | conjunctivitis                    |
| abdominal pain | upper respiratory tract infection |
| abdominal pain | fever                             |
| abdominal pain | pancreatitis                      |
| abdominal pain | hypersensitivity                  |
| abdominal pain | malaise                           |
| abdominal pain | purpura                           |
| abdominal pain | hepatitis                         |
| abdominal pain | infection                         |
| abdominal pain | muscle cramps                     |
| abdominal pain | alopecia                          |
| abdominal pain | angioedema                        |
| abdominal pain | arthritis                         |
| abdominal pain | gastroenteritis                   |
| abdominal pain | rhinitis                          |
| abdominal pain | anorexia                          |
| abdominal pain | myalgia                           |
| abdominal pain | pneumonia                         |
| abdominal pain | eczema                            |
| abdominal pain | dermatitis                        |
| abdominal pain | toxic epidermal necrolysis        |
| abnormal gait  | dysmenorrhea                      |
| abnormal gait  | goiter                            |
| abnormal gait  | personality disorder              |
| abnormal gait  | grand mal                         |
| abnormal gait  | paranoia                          |
| abnormal gait  | ventricular tachycardia           |
| abnormal gait  | anxiety                           |
| abnormal gait  | psoriasis                         |
| abnormal gait  | seizures                          |
| abnormal gait  | spasm                             |
| abnormal gait  | sweating                          |
| abnormal gait  | delirium                          |
| abnormal gait  | heart block                       |
| abnormal gait  | torticollis                       |
| abnormal gait  | dry mouth                         |
| abnormal gait  | galactorrhea                      |
| abnormal gait  | hallucinations                    |
| abnormal gait  | nightmares                        |
| abnormal gait  | priapism                          |
| abnormal gait  | syncope                           |
| abnormal gait  | urinary incontinence              |
| abnormal gait  | confusion                         |
| abnormal gait  | increased salivation              |
| abnormal gait  | somnolence                        |
| abnormal gait  | tardive dyskinesia                |
| abnormal gait  | urinary retention                 |
| abnormal gait  | ataxia                            |
| abnormal gait  | bradycardia                       |
| abnormal gait  | dyskinesia                        |
| abnormal gait  | hypotension                       |

|                 |                                |
|-----------------|--------------------------------|
| abnormal gait   | insomnia                       |
| abnormal gait   | palpitations                   |
| abnormal gait   | paralytic ileus                |
| abnormal gait   | impotence                      |
| abnormal gait   | nasal congestion               |
| abnormal vision | blurred vision                 |
| abnormal vision | keratitis                      |
| abnormal vision | serotonin syndrome             |
| abnormal vision | supraventricular extrasystoles |
| abnormal vision | agitation                      |
| abnormal vision | grand mal                      |
| abnormal vision | paranoia                       |
| abnormal vision | photophobia                    |
| abnormal vision | ventricular tachycardia        |
| abnormal vision | nervousness                    |
| abnormal vision | psoriasis                      |
| abnormal vision | sweating                       |
| abnormal vision | heart block                    |
| abnormal vision | torticollis                    |
| abnormal vision | dry mouth                      |
| abnormal vision | galactorrhea                   |
| abnormal vision | nightmares                     |
| abnormal vision | priapism                       |
| abnormal vision | syncope                        |
| abnormal vision | increased salivation           |
| abnormal vision | somnolence                     |
| abnormal vision | tardive dyskinesia             |
| abnormal vision | urinary retention              |
| abnormal vision | bradycardia                    |
| abnormal vision | dyskinesia                     |
| abnormal vision | hypotension                    |
| abnormal vision | insomnia                       |
| abnormal vision | palpitations                   |
| abnormal vision | paralytic ileus                |
| abnormal vision | impotence                      |
| abnormal vision | nasal congestion               |
| abuse           | drug dependence                |
| abuse           | fecal impaction                |
| abuse           | glaucoma                       |
| abuse           | hyperacusis                    |
| abuse           | hypothermia                    |
| abuse           | hypoventilation                |
| abuse           | labyrinthitis                  |
| abuse           | pyelonephritis                 |
| abuse           | sneezing                       |
| abuse           | stridor                        |
| abuse           | urinary hesitancy              |
| abuse           | ventricular extrasystoles      |
| abuse           | voice alteration               |
| abuse           | wheezing                       |
| acidosis        | amblyopia                      |
| acidosis        | arthrosis                      |
| acidosis        | carcinoma                      |
| acidosis        | contact dermatitis             |

|                     |                                |
|---------------------|--------------------------------|
| acidosis            | hemorrhoids                    |
| acidosis            | neck rigidity                  |
| acidosis            | polyuria                       |
| acidosis            | tenesmus                       |
| acidosis            | vaginal hemorrhage             |
| acidosis            | vaginitis                      |
| acute renal failure | hyperkalemia                   |
| acute renal failure | pruritus                       |
| agitation           | blurred vision                 |
| agitation           | keratitis                      |
| agitation           | serotonin syndrome             |
| agitation           | supraventricular extrasystoles |
| agitation           | impotence                      |
| agitation           | tachycardia                    |
| agitation           | grand mal                      |
| agitation           | paranoia                       |
| agitation           | photophobia                    |
| agitation           | ventricular tachycardia        |
| agitation           | nervousness                    |
| agitation           | psoriasis                      |
| agitation           | sweating                       |
| agitation           | heart block                    |
| agitation           | torticollis                    |
| agitation           | dry mouth                      |
| agitation           | galactorrhea                   |
| agitation           | nightmares                     |
| agitation           | priapism                       |
| agitation           | syncope                        |
| agranulocytosis     | asthma                         |
| agranulocytosis     | cystitis                       |
| agranulocytosis     | peptic ulcer                   |
| agranulocytosis     | exfoliative dermatitis         |
| agranulocytosis     | aplastic anemia                |
| agranulocytosis     | hearing loss                   |
| agranulocytosis     | melen                          |
| agranulocytosis     | colitis                        |
| agranulocytosis     | ecchymosis                     |
| agranulocytosis     | hematemesis                    |
| agranulocytosis     | interstitial nephritis         |
| agranulocytosis     | rectal hemorrhage              |
| agranulocytosis     | dysuria                        |
| agranulocytosis     | hepatic failure                |
| agranulocytosis     | herpes simplex                 |
| agranulocytosis     | proteinuria                    |
| agranulocytosis     | heartburn                      |
| agranulocytosis     | eructation                     |
| agranulocytosis     | hemolytic anemia               |
| agranulocytosis     | gastritis                      |
| agranulocytosis     | congestive heart failure       |
| agranulocytosis     | pancytopenia                   |
| agranulocytosis     | sepsis                         |
| agranulocytosis     | hypertension                   |
| agranulocytosis     | hematuria                      |
| agranulocytosis     | toxic epidermal necrolysis     |

|                                |                               |
|--------------------------------|-------------------------------|
| agranulocytosis                | anaphylaxis                   |
| agranulocytosis                | anxiety                       |
| agranulocytosis                | esophagitis                   |
| agranulocytosis                | lymphadenopathy               |
| agranulocytosis                | angioedema                    |
| agranulocytosis                | gastrointestinal hemorrhage   |
| albuminuria                    | glossitis                     |
| albuminuria                    | diplopia                      |
| albuminuria                    | herpes simplex                |
| albuminuria                    | otitis media                  |
| albuminuria                    | phlebitis                     |
| albuminuria                    | eructation                    |
| albuminuria                    | amnesia                       |
| albuminuria                    | hiccup                        |
| albuminuria                    | breast pain                   |
| albuminuria                    | hypoxia                       |
| albuminuria                    | gastrointestinal hemorrhage   |
| albuminuria                    | colitis                       |
| albuminuria                    | hallucinations                |
| albuminuria                    | hyperglycemia                 |
| albuminuria                    | laryngitis                    |
| albuminuria                    | shock                         |
| albuminuria                    | urinary incontinence          |
| albuminuria                    | coma                          |
| albuminuria                    | confusion                     |
| albuminuria                    | dysuria                       |
| albuminuria                    | urinary frequency             |
| albuminuria                    | liver function tests abnormal |
| albuminuria                    | migraine                      |
| albuminuria                    | ulcerative stomatitis         |
| albuminuria                    | ataxia                        |
| albuminuria                    | hypotension                   |
| albuminuria                    | gastritis                     |
| albuminuria                    | paralysis                     |
| albuminuria                    | pulmonary embolism            |
| albuminuria                    | sleep disorder                |
| albuminuria                    | ventricular fibrillation      |
| albuminuria                    | tachycardia                   |
| alkaline phosphatase increased | blepharitis                   |
| alkaline phosphatase increased | dysphagia                     |
| alkaline phosphatase increased | amenorrhea                    |
| alkaline phosphatase increased | breast enlargement            |
| alkaline phosphatase increased | delirium                      |
| alkaline phosphatase increased | torticollis                   |
| alkaline phosphatase increased | galactorrhea                  |
| alkaline phosphatase increased | priapism                      |
| alkaline phosphatase increased | increased salivation          |
| alkaline phosphatase increased | tardive dyskinesia            |
| alkaline phosphatase increased | urinary retention             |
| alkaline phosphatase increased | constipation                  |
| alkaline phosphatase increased | dyskinesia                    |
| alkaline phosphatase increased | paralytic ileus               |
| alkaline phosphatase increased | weight loss                   |
| alopecia                       | infection                     |

|           |                             |
|-----------|-----------------------------|
| alopecia  | thrombocytopenia            |
| alopecia  | anemia                      |
| alopecia  | dyspnea                     |
| alopecia  | pancreatitis                |
| alopecia  | stomatitis                  |
| alopecia  | toxic epidermal necrolysis  |
| alopecia  | leukopenia                  |
| alopecia  | hematuria                   |
| alopecia  | erythema multiforme         |
| alopecia  | hypersensitivity            |
| alopecia  | asthenia                    |
| alopecia  | anorexia                    |
| alopecia  | malaise                     |
| alopecia  | congestive heart failure    |
| alopecia  | peripheral neuropathy       |
| alopecia  | pneumonia                   |
| alopecia  | vertigo                     |
| alopecia  | ulcer                       |
| alopecia  | myalgia                     |
| alopecia  | fever                       |
| alopecia  | epistaxis                   |
| alopecia  | dermatitis                  |
| alopecia  | conjunctivitis              |
| alopecia  | ecchymosis                  |
| alopecia  | hematemesis                 |
| alopecia  | interstitial nephritis      |
| alopecia  | photosensitivity            |
| alopecia  | rectal hemorrhage           |
| alopecia  | anaphylaxis                 |
| alopecia  | esophagitis                 |
| alopecia  | angioedema                  |
| alopecia  | gastrointestinal hemorrhage |
| alopecia  | cough                       |
| alopecia  | gastritis                   |
| alopecia  | renal failure               |
| alopecia  | neutropenia                 |
| alopecia  | arthralgia                  |
| alopecia  | flatulence                  |
| alopecia  | heart failure               |
| alopecia  | vasculitis                  |
| alopecia  | hemorrhage                  |
| alopecia  | sepsis                      |
| alopecia  | hepatitis                   |
| alopecia  | exfoliative dermatitis      |
| alopecia  | aplastic anemia             |
| alopecia  | hearing loss                |
| alopecia  | melena                      |
| alopecia  | tinnitus                    |
| alopecia  | vomiting                    |
| amblyopia | arthrosis                   |
| amblyopia | carcinoma                   |
| amblyopia | contact dermatitis          |
| amblyopia | hemorrhoids                 |
| amblyopia | neck rigidity               |

|             |                               |
|-------------|-------------------------------|
| amblyopia   | polyuria                      |
| amblyopia   | tenesmus                      |
| amblyopia   | vaginal hemorrhage            |
| amblyopia   | vaginitis                     |
| amenorrhea  | torticollis                   |
| amenorrhea  | priapism                      |
| amenorrhea  | increased salivation          |
| amenorrhea  | tardive dyskinesia            |
| amenorrhea  | dyskinesia                    |
| amenorrhea  | paralytic ileus               |
| amenorrhea  | blepharitis                   |
| amenorrhea  | dysphagia                     |
| amenorrhea  | tachycardia                   |
| amenorrhea  | breast enlargement            |
| amenorrhea  | gynecomastia                  |
| amenorrhea  | spasm                         |
| amenorrhea  | delirium                      |
| amenorrhea  | dry mouth                     |
| amenorrhea  | galactorrhea                  |
| amenorrhea  | glycosuria                    |
| amnesia     | ataxia                        |
| amnesia     | otitis media                  |
| amnesia     | phlebitis                     |
| amnesia     | hiccup                        |
| amnesia     | tremor                        |
| amnesia     | breast pain                   |
| amnesia     | glossitis                     |
| amnesia     | hypoxia                       |
| amnesia     | diplopia                      |
| amnesia     | hallucinations                |
| amnesia     | laryngitis                    |
| amnesia     | shock                         |
| amnesia     | urinary incontinence          |
| amnesia     | coma                          |
| amnesia     | confusion                     |
| amnesia     | herpes simplex                |
| amnesia     | urinary frequency             |
| amnesia     | liver function tests abnormal |
| amnesia     | migraine                      |
| amnesia     | eructation                    |
| amnesia     | hypotension                   |
| amnesia     | apnea                         |
| amnesia     | paralysis                     |
| amnesia     | pulmonary embolism            |
| amnesia     | sleep disorder                |
| amnesia     | ventricular fibrillation      |
| amnesia     | tachycardia                   |
| amnesia     | dry skin                      |
| amnesia     | dysarthria                    |
| amnesia     | lymphadenopathy               |
| amnesia     | nervousness                   |
| amnesia     | neurosis                      |
| amnesia     | gastrointestinal hemorrhage   |
| anaphylaxis | hematuria                     |

|                 |                             |
|-----------------|-----------------------------|
| anaphylaxis     | pneumonia                   |
| anaphylaxis     | hepatitis                   |
| anaphylaxis     | sepsis                      |
| anaphylaxis     | malaise                     |
| anaphylaxis     | pancreatitis                |
| anaphylaxis     | toxic epidermal necrolysis  |
| anaphylaxis     | cystitis                    |
| anaphylaxis     | esophagitis                 |
| anaphylaxis     | lymphadenopathy             |
| anaphylaxis     | peptic ulcer                |
| anaphylaxis     | angioedema                  |
| anaphylaxis     | gastrointestinal hemorrhage |
| anemia          | stomatitis                  |
| anemia          | leukopenia                  |
| anemia          | dyspnea                     |
| anemia          | congestive heart failure    |
| anemia          | anorexia                    |
| anemia          | asthenia                    |
| anemia          | constitutional symptoms     |
| anemia          | infection                   |
| anemia          | neutropenia                 |
| anemia          | hemorrhage                  |
| anemia          | thrombocytopenia            |
| anemia          | toxic epidermal necrolysis  |
| anemia          | pancreatitis                |
| anemia          | erythema multiforme         |
| anemia          | hematuria                   |
| anemia          | malaise                     |
| anemia          | dermatitis                  |
| anemia          | peripheral neuropathy       |
| anemia          | gastrointestinal hemorrhage |
| anemia          | hypersensitivity            |
| anemia          | cough                       |
| anemia          | gastritis                   |
| anemia          | neuropathy                  |
| anemia          | pneumonia                   |
| anemia          | renal failure               |
| anemia          | erythema                    |
| anemia          | epistaxis                   |
| anemia          | pleural effusion            |
| angina pectoris | gout                        |
| angina pectoris | rhinitis                    |
| angina pectoris | hyponatremia                |
| angina pectoris | chest pain                  |
| angina pectoris | hyperkalemia                |
| angina pectoris | hemolytic anemia            |
| angina pectoris | palpitations                |
| angina pectoris | muscle cramps               |
| angioedema      | hepatitis                   |
| angioedema      | vertigo                     |
| angioedema      | purpura                     |
| angioedema      | jaundice                    |
| angioedema      | colitis                     |
| angioedema      | ecchymosis                  |

|            |                            |
|------------|----------------------------|
| angioedema | hematemesis                |
| angioedema | interstitial nephritis     |
| angioedema | photosensitivity           |
| angioedema | rectal hemorrhage          |
| angioedema | exfoliative dermatitis     |
| angioedema | cystitis                   |
| angioedema | peptic ulcer               |
| angioedema | pancreatitis               |
| angioedema | flatulence                 |
| angioedema | eructation                 |
| angioedema | hemolytic anemia           |
| angioedema | aplastic anemia            |
| angioedema | hearing loss               |
| angioedema | melen                      |
| angioedema | tinnitus                   |
| angioedema | gastritis                  |
| angioedema | toxic epidermal necrolysis |
| angioedema | epistaxis                  |
| angioedema | dysuria                    |
| angioedema | hepatic failure            |
| angioedema | herpes simplex             |
| angioedema | proteinuria                |
| angioedema | vasculitis                 |
| angioedema | hematuria                  |
| angioedema | esophagitis                |
| angioedema | lymphadenopathy            |
| angioedema | conjunctivitis             |
| angioedema | erythema multiforme        |
| anorexia   | fever                      |
| anorexia   | stomatitis                 |
| anorexia   | infection                  |
| anorexia   | dyspnea                    |
| anorexia   | hypersensitivity           |
| anorexia   | neutropenia                |
| anorexia   | asthenia                   |
| anorexia   | constitutional symptoms    |
| anorexia   | leukopenia                 |
| anorexia   | malaise                    |
| anorexia   | pancreatitis               |
| anorexia   | congestive heart failure   |
| anorexia   | edema                      |
| anorexia   | hematuria                  |
| anorexia   | cough                      |
| anorexia   | neuropathy                 |
| anorexia   | conjunctivitis             |
| anorexia   | hemorrhage                 |
| anorexia   | thrombocytopenia           |
| anorexia   | dermatitis                 |
| anxiety    | insomnia                   |
| anxiety    | psoriasis                  |
| anxiety    | heart block                |
| anxiety    | nightmares                 |
| anxiety    | decreased libido           |
| anxiety    | dysmenorrhea               |



|                 |                             |
|-----------------|-----------------------------|
| anxiety         | goiter                      |
| anxiety         | personality disorder        |
| anxiety         | bradycardia                 |
| anxiety         | palpitations                |
| anxiety         | asthma                      |
| anxiety         | bronchospasm                |
| anxiety         | dizziness                   |
| anxiety         | grand mal                   |
| anxiety         | lightheadedness             |
| anxiety         | paranoia                    |
| anxiety         | sore throat                 |
| anxiety         | ventricular tachycardia     |
| anxiety         | tremor                      |
| anxiety         | mental depression           |
| anxiety         | seizures                    |
| anxiety         | spasm                       |
| anxiety         | sweating                    |
| aplastic anemia | hearing loss                |
| aplastic anemia | melen                       |
| aplastic anemia | hematemesis                 |
| aplastic anemia | interstitial nephritis      |
| aplastic anemia | rectal hemorrhage           |
| aplastic anemia | hepatic failure             |
| aplastic anemia | proteinuria                 |
| aplastic anemia | peptic ulcer                |
| aplastic anemia | gastritis                   |
| aplastic anemia | sepsis                      |
| aplastic anemia | hematuria                   |
| aplastic anemia | exfoliative dermatitis      |
| aplastic anemia | toxic epidermal necrolysis  |
| aplastic anemia | colitis                     |
| aplastic anemia | ecchymosis                  |
| aplastic anemia | gastrointestinal hemorrhage |
| aplastic anemia | dysuria                     |
| aplastic anemia | ulcer                       |
| aplastic anemia | vasculitis                  |
| aplastic anemia | erythema multiforme         |
| aplastic anemia | eructation                  |
| aplastic anemia | hemolytic anemia            |
| aplastic anemia | pneumonia                   |
| aplastic anemia | renal failure               |
| aplastic anemia | cystitis                    |
| aplastic anemia | esophagitis                 |
| aplastic anemia | pancytopenia                |
| aplastic anemia | congestive heart failure    |
| aplastic anemia | pancreatitis                |
| aplastic anemia | flatulence                  |
| aplastic anemia | herpes simplex              |
| aplastic anemia | heartburn                   |
| aplastic anemia | stomatitis                  |
| aplastic anemia | thrombocytopenia            |
| aplastic anemia | asthma                      |
| aplastic anemia | hepatitis                   |
| apnea           | nervousness                 |

|            |                            |
|------------|----------------------------|
| apnea      | syncope                    |
| apnea      | urinary retention          |
| apnea      | ataxia                     |
| apnea      | dyskinesia                 |
| apnea      | insomnia                   |
| apnea      | impotence                  |
| apnea      | tremor                     |
| apnea      | cardiac arrest             |
| apnea      | paralysis                  |
| apnea      | photophobia                |
| apnea      | dysarthria                 |
| apnea      | hiccup                     |
| apnea      | diplopia                   |
| apnea      | galactorrhea               |
| apnea      | hallucinations             |
| apnea      | laryngitis                 |
| apnea      | nightmares                 |
| apnea      | shock                      |
| apnea      | urinary incontinence       |
| arrhythmia | hypoglycemia               |
| arrhythmia | hypotension                |
| arrhythmia | palpitations               |
| arthralgia | infection                  |
| arthritis  | pancreatitis               |
| arthritis  | rhinitis                   |
| arthritis  | muscle cramps              |
| arthritis  | malaise                    |
| arthrosis  | carcinoma                  |
| arthrosis  | contact dermatitis         |
| arthrosis  | hemorrhoids                |
| arthrosis  | neck rigidity              |
| arthrosis  | polyuria                   |
| arthrosis  | tenesmus                   |
| arthrosis  | vaginal hemorrhage         |
| arthrosis  | vaginitis                  |
| asthenia   | dyspnea                    |
| asthenia   | leukopenia                 |
| asthenia   | pancreatitis               |
| asthenia   | congestive heart failure   |
| asthenia   | stomatitis                 |
| asthenia   | constitutional symptoms    |
| asthenia   | erythema multiforme        |
| asthenia   | hemorrhage                 |
| asthenia   | renal failure              |
| asthenia   | rash                       |
| asthenia   | infection                  |
| asthenia   | thrombocytopenia           |
| asthenia   | cough                      |
| asthenia   | neuropathy                 |
| asthenia   | toxic epidermal necrolysis |
| asthenia   | diarrhea                   |
| asthenia   | vasculitis                 |
| asthenia   | neutropenia                |
| asthma     | heartburn                  |

|                     |                               |
|---------------------|-------------------------------|
| asthma              | exfoliative dermatitis        |
| asthma              | cystitis                      |
| asthma              | peptic ulcer                  |
| asthma              | glossitis                     |
| asthma              | hearing loss                  |
| asthma              | melena                        |
| asthma              | colitis                       |
| asthma              | ecchymosis                    |
| asthma              | eczema                        |
| asthma              | hematemesis                   |
| asthma              | interstitial nephritis        |
| asthma              | rectal hemorrhage             |
| ataxia              | tremor                        |
| ataxia              | hallucinations                |
| ataxia              | urinary incontinence          |
| ataxia              | confusion                     |
| ataxia              | diplopia                      |
| ataxia              | laryngitis                    |
| ataxia              | tachycardia                   |
| ataxia              | coma                          |
| ataxia              | somnolence                    |
| ataxia              | hiccup                        |
| ataxia              | hypotension                   |
| ataxia              | breast pain                   |
| ataxia              | delirium                      |
| ataxia              | hypoxia                       |
| ataxia              | syncope                       |
| ataxia              | otitis media                  |
| ataxia              | phlebitis                     |
| ataxia              | sleep disorder                |
| ataxia              | ventricular fibrillation      |
| ataxia              | urinary frequency             |
| ataxia              | urinary retention             |
| ataxia              | bradycardia                   |
| ataxia              | dyskinesia                    |
| ataxia              | eructation                    |
| ataxia              | insomnia                      |
| ataxia              | dysarthria                    |
| ataxia              | nervousness                   |
| ataxia              | neurosis                      |
| ataxia              | impotence                     |
| ataxia              | glossitis                     |
| ataxia              | dysmenorrhea                  |
| ataxia              | goiter                        |
| ataxia              | hypothyroidism                |
| ataxia              | liver function tests abnormal |
| ataxia              | menorrhagia                   |
| ataxia              | migraine                      |
| ataxia              | personality disorder          |
| ataxia              | psychosis                     |
| ataxia              | galactorrhea                  |
| ataxia              | nightmares                    |
| ataxia              | shock                         |
| atrial fibrillation | dehydration                   |

|                |                                |
|----------------|--------------------------------|
| AV block       | bradycardia                    |
| AV block       | postural hypotension           |
| AV block       | mental depression              |
| AV block       | heart block                    |
| AV block       | impotence                      |
| AV block       | fatigue                        |
| AV block       | nightmares                     |
| AV block       | syncope                        |
| AV block       | bronchospasm                   |
| AV block       | dizziness                      |
| AV block       | lightheadedness                |
| AV block       | sore throat                    |
| AV block       | urinary retention              |
| AV block       | insomnia                       |
| AV block       | palpitations                   |
| AV block       | psoriasis                      |
| AV block       | sweating                       |
| AV block       | weakness                       |
| AV block       | nasal congestion               |
| AV block       | dry mouth                      |
| AV block       | galactorrhea                   |
| AV block       | priapism                       |
| AV block       | cold extremities               |
| AV block       | decreased libido               |
| AV block       | memory loss                    |
| AV block       | psychosis                      |
| AV block       | shortness of breath            |
| AV block       | weight gain                    |
| AV block       | increased salivation           |
| AV block       | somnolence                     |
| AV block       | tardive dyskinesia             |
| blepharitis    | dysphagia                      |
| blepharitis    | breast enlargement             |
| blepharitis    | delirium                       |
| blepharitis    | torticollis                    |
| blepharitis    | galactorrhea                   |
| blepharitis    | priapism                       |
| blepharitis    | increased salivation           |
| blepharitis    | tardive dyskinesia             |
| blepharitis    | urinary retention              |
| blepharitis    | constipation                   |
| blepharitis    | dyskinesia                     |
| blepharitis    | paralytic ileus                |
| blepharitis    | weight loss                    |
| blurred vision | keratitis                      |
| blurred vision | serotonin syndrome             |
| blurred vision | supraventricular extrasystoles |
| blurred vision | grand mal                      |
| blurred vision | paranoia                       |
| blurred vision | photophobia                    |
| blurred vision | ventricular tachycardia        |
| blurred vision | nervousness                    |
| blurred vision | psoriasis                      |
| blurred vision | sweating                       |

|                |                         |
|----------------|-------------------------|
| blurred vision | heart block             |
| blurred vision | torticollis             |
| blurred vision | dry mouth               |
| blurred vision | galactorrhea            |
| blurred vision | nightmares              |
| blurred vision | priapism                |
| blurred vision | syncope                 |
| blurred vision | increased salivation    |
| blurred vision | somnolence              |
| blurred vision | tardive dyskinesia      |
| blurred vision | urinary retention       |
| blurred vision | bradycardia             |
| blurred vision | dyskinesia              |
| blurred vision | hypotension             |
| blurred vision | insomnia                |
| blurred vision | palpitations            |
| blurred vision | paralytic ileus         |
| blurred vision | impotence               |
| blurred vision | nasal congestion        |
| bradycardia    | heart block             |
| bradycardia    | nightmares              |
| bradycardia    | urinary retention       |
| bradycardia    | mental depression       |
| bradycardia    | psoriasis               |
| bradycardia    | sweating                |
| bradycardia    | postural hypotension    |
| bradycardia    | insomnia                |
| bradycardia    | impotence               |
| bradycardia    | nasal congestion        |
| bradycardia    | dry mouth               |
| bradycardia    | galactorrhea            |
| bradycardia    | priapism                |
| bradycardia    | syncope                 |
| bradycardia    | tachycardia             |
| bradycardia    | grand mal               |
| bradycardia    | lightheadedness         |
| bradycardia    | paranoia                |
| bradycardia    | photophobia             |
| bradycardia    | sore throat             |
| bradycardia    | ventricular tachycardia |
| bradycardia    | tremor                  |
| bradycardia    | increased salivation    |
| bradycardia    | somnolence              |
| bradycardia    | tardive dyskinesia      |
| bradycardia    | dyskinesia              |
| bradycardia    | hypotension             |
| bradycardia    | palpitations            |
| bradycardia    | paralytic ileus         |
| bradycardia    | nervousness             |
| bradycardia    | spasm                   |
| bradycardia    | delirium                |
| bradycardia    | torticollis             |
| bradycardia    | cold extremities        |
| bradycardia    | decreased libido        |

|                    |                                   |
|--------------------|-----------------------------------|
| bradycardia        | dysmenorrhea                      |
| bradycardia        | goiter                            |
| bradycardia        | keratitis                         |
| bradycardia        | memory loss                       |
| bradycardia        | personality disorder              |
| bradycardia        | psychosis                         |
| bradycardia        | serotonin syndrome                |
| bradycardia        | shortness of breath               |
| bradycardia        | supraventricular extrasystoles    |
| bradycardia        | weight gain                       |
| bradycardia        | fatigue                           |
| bradycardia        | hallucinations                    |
| bradycardia        | urinary incontinence              |
| breast enlargement | delirium                          |
| breast enlargement | dysphagia                         |
| breast enlargement | tachycardia                       |
| breast enlargement | torticollis                       |
| breast enlargement | galactorrhea                      |
| breast enlargement | hallucinations                    |
| breast enlargement | priapism                          |
| breast enlargement | urinary incontinence              |
| breast pain        | laryngitis                        |
| breast pain        | urinary frequency                 |
| breast pain        | hypoxia                           |
| breast pain        | hallucinations                    |
| breast pain        | urinary incontinence              |
| breast pain        | coma                              |
| breast pain        | confusion                         |
| breast pain        | otitis media                      |
| breast pain        | phlebitis                         |
| breast pain        | pulmonary embolism                |
| breast pain        | sleep disorder                    |
| breast pain        | eructation                        |
| breast pain        | hiccup                            |
| breast pain        | tachycardia                       |
| breast pain        | tremor                            |
| breast pain        | glossitis                         |
| breast pain        | diplopia                          |
| breast pain        | herpes simplex                    |
| breast pain        | liver function tests abnormal     |
| breast pain        | migraine                          |
| breast pain        | thrombophlebitis                  |
| breast pain        | hypotension                       |
| breast pain        | ventricular fibrillation          |
| bronchitis         | upper respiratory tract infection |
| bronchospasm       | dizziness                         |
| bronchospasm       | fatigue                           |
| bronchospasm       | decreased libido                  |
| bronchospasm       | lightheadedness                   |
| bronchospasm       | sore throat                       |
| bronchospasm       | mental depression                 |
| bronchospasm       | psoriasis                         |
| bronchospasm       | weakness                          |
| bronchospasm       | flushing                          |

|                     |                                |
|---------------------|--------------------------------|
| bronchospasm        | heart block                    |
| bronchospasm        | nightmares                     |
| bronchospasm        | syncope                        |
| bundle branch block | cardiomyopathy                 |
| bundle branch block | cholecystitis                  |
| bundle branch block | deafness                       |
| bundle branch block | fecal incontinence             |
| bundle branch block | hyperhidrosis                  |
| bundle branch block | ischemic colitis               |
| bundle branch block | leukocytosis                   |
| bundle branch block | neuralgia                      |
| bundle branch block | skin ulcer                     |
| bundle branch block | suicide attempt                |
| cancer              | pleural effusion               |
| cancer              | constitutional symptoms        |
| cancer              | pulmonary edema                |
| carcinoma           | contact dermatitis             |
| carcinoma           | hemorrhoids                    |
| carcinoma           | neck rigidity                  |
| carcinoma           | polyuria                       |
| carcinoma           | tenesmus                       |
| carcinoma           | vaginal hemorrhage             |
| carcinoma           | vaginitis                      |
| cardiac arrest      | photophobia                    |
| cardiac arrest      | nervousness                    |
| cardiac arrest      | syncope                        |
| cardiomyopathy      | cholecystitis                  |
| cardiomyopathy      | deafness                       |
| cardiomyopathy      | fecal incontinence             |
| cardiomyopathy      | hyperhidrosis                  |
| cardiomyopathy      | ischemic colitis               |
| cardiomyopathy      | leukocytosis                   |
| cardiomyopathy      | neuralgia                      |
| cardiomyopathy      | skin ulcer                     |
| cardiomyopathy      | suicide attempt                |
| chest pain          | gout                           |
| chest pain          | palpitations                   |
| chest pain          | rhinitis                       |
| chills              | impotence                      |
| chills              | stomatitis                     |
| chills              | peripheral neuropathy          |
| chills              | neuropathy                     |
| chills              | malaise                        |
| cholecystitis       | deafness                       |
| cholecystitis       | fecal incontinence             |
| cholecystitis       | hyperhidrosis                  |
| cholecystitis       | ischemic colitis               |
| cholecystitis       | leukocytosis                   |
| cholecystitis       | neuralgia                      |
| cholecystitis       | skin ulcer                     |
| cholecystitis       | suicide attempt                |
| choreoathetosis     | lactic dehydrogenase increased |
| choreoathetosis     | pyuria                         |
| cold extremities    | weight gain                    |

|                  |                             |
|------------------|-----------------------------|
| cold extremities | grand mal                   |
| cold extremities | paranoia                    |
| cold extremities | ventricular tachycardia     |
| cold extremities | neurosis                    |
| cold extremities | psoriasis                   |
| cold extremities | sweating                    |
| cold extremities | heart block                 |
| cold extremities | torticollis                 |
| cold extremities | dry mouth                   |
| cold extremities | eczema                      |
| cold extremities | fatigue                     |
| cold extremities | galactorrhea                |
| cold extremities | nightmares                  |
| cold extremities | priapism                    |
| cold extremities | syncope                     |
| cold extremities | increased salivation        |
| cold extremities | somnolence                  |
| cold extremities | tardive dyskinesia          |
| cold extremities | urinary retention           |
| cold extremities | constipation                |
| cold extremities | dyskinesia                  |
| cold extremities | hypotension                 |
| cold extremities | insomnia                    |
| cold extremities | palpitations                |
| cold extremities | paralytic ileus             |
| cold extremities | impotence                   |
| cold extremities | nasal congestion            |
| colitis          | eructation                  |
| colitis          | gastritis                   |
| colitis          | ecchymosis                  |
| colitis          | hematemesis                 |
| colitis          | interstitial nephritis      |
| colitis          | rectal hemorrhage           |
| colitis          | dysuria                     |
| colitis          | herpes simplex              |
| colitis          | gastrointestinal hemorrhage |
| colitis          | cystitis                    |
| colitis          | lymphadenopathy             |
| colitis          | peptic ulcer                |
| colitis          | glossitis                   |
| colitis          | hearing loss                |
| colitis          | melena                      |
| colitis          | hepatitis                   |
| colitis          | exfoliative dermatitis      |
| colitis          | toxic epidermal necrolysis  |
| colitis          | flatulence                  |
| colitis          | hepatic failure             |
| colitis          | proteinuria                 |
| colitis          | hemolytic anemia            |
| colitis          | erythema multiforme         |
| colitis          | dry skin                    |
| colitis          | esophagitis                 |
| colitis          | stomatitis                  |
| colitis          | pancytopenia                |



|           |                               |
|-----------|-------------------------------|
| colitis   | sepsis                        |
| colitis   | hematuria                     |
| colitis   | tinnitus                      |
| colitis   | jaundice                      |
| colitis   | photosensitivity              |
| colitis   | heartburn                     |
| colitis   | liver function tests abnormal |
| colitis   | migraine                      |
| colitis   | ulcerative stomatitis         |
| colitis   | coma                          |
| colitis   | ulcer                         |
| colitis   | vasculitis                    |
| colitis   | pancreatitis                  |
| colitis   | otitis media                  |
| colitis   | phlebitis                     |
| colitis   | pulmonary embolism            |
| colitis   | pneumonia                     |
| colitis   | renal failure                 |
| coma      | hypoxia                       |
| coma      | tremor                        |
| coma      | confusion                     |
| coma      | eructation                    |
| coma      | diplopia                      |
| coma      | hallucinations                |
| coma      | laryngitis                    |
| coma      | urinary incontinence          |
| coma      | otitis media                  |
| coma      | phlebitis                     |
| coma      | sleep disorder                |
| coma      | dysuria                       |
| coma      | herpes simplex                |
| coma      | urinary frequency             |
| coma      | dysarthria                    |
| coma      | hiccup                        |
| coma      | lymphadenopathy               |
| coma      | glossitis                     |
| coma      | tinnitus                      |
| coma      | tachycardia                   |
| coma      | liver function tests abnormal |
| coma      | migraine                      |
| coma      | gastrointestinal hemorrhage   |
| confusion | hallucinations                |
| confusion | urinary incontinence          |
| confusion | tremor                        |
| confusion | hypoxia                       |
| confusion | laryngitis                    |
| confusion | tachycardia                   |
| confusion | dysarthria                    |
| confusion | hiccup                        |
| confusion | hypotension                   |
| confusion | delirium                      |
| confusion | diplopia                      |
| confusion | otitis media                  |
| confusion | phlebitis                     |

|                          |                               |
|--------------------------|-------------------------------|
| confusion                | sleep disorder                |
| confusion                | ventricular fibrillation      |
| confusion                | somnolence                    |
| confusion                | urinary frequency             |
| confusion                | eructation                    |
| confusion                | neurosis                      |
| confusion                | glossitis                     |
| confusion                | galactorrhea                  |
| confusion                | nightmares                    |
| confusion                | syncope                       |
| confusion                | dysmenorrhea                  |
| confusion                | goiter                        |
| confusion                | hypothyroidism                |
| confusion                | liver function tests abnormal |
| confusion                | menorrhagia                   |
| confusion                | migraine                      |
| confusion                | personality disorder          |
| confusion                | dysuria                       |
| confusion                | herpes simplex                |
| confusion                | increased salivation          |
| confusion                | urinary retention             |
| congestive heart failure | stomatitis                    |
| congestive heart failure | constitutional symptoms       |
| congestive heart failure | leukopenia                    |
| congestive heart failure | hemorrhage                    |
| congestive heart failure | dyspnea                       |
| congestive heart failure | toxic epidermal necrolysis    |
| congestive heart failure | heart failure                 |
| congestive heart failure | hematuria                     |
| congestive heart failure | neuropathy                    |
| congestive heart failure | erythema multiforme           |
| congestive heart failure | erythema                      |
| congestive heart failure | sepsis                        |
| congestive heart failure | pleural effusion              |
| congestive heart failure | weight loss                   |
| congestive heart failure | thrombocytopenia              |
| congestive heart failure | pancreatitis                  |
| congestive heart failure | neutropenia                   |
| congestive heart failure | infection                     |
| congestive heart failure | gastrointestinal hemorrhage   |
| congestive heart failure | gastritis                     |
| congestive heart failure | pneumonia                     |
| congestive heart failure | renal failure                 |
| congestive heart failure | hearing loss                  |
| congestive heart failure | melena                        |
| congestive heart failure | peripheral edema              |
| congestive heart failure | peripheral neuropathy         |
| congestive heart failure | exfoliative dermatitis        |
| congestive heart failure | ecchymosis                    |
| congestive heart failure | hematemesis                   |
| congestive heart failure | interstitial nephritis        |
| congestive heart failure | pulmonary edema               |
| congestive heart failure | rectal hemorrhage             |
| congestive heart failure | esophagitis                   |

congestive heart failure  
conjunctivitis  
constipation  
constitutional symptoms  
constitutional symptoms  
constitutional symptoms  
constitutional symptoms  
constitutional symptoms  
constitutional symptoms

peptic ulcer  
hypersensitivity  
edema  
cough  
hepatic failure  
proteinuria  
ulcer  
pancytopenia  
pain  
epistaxis  
upper respiratory tract infection  
pneumonia  
infection  
pancreatitis  
hypersensitivity  
fever  
hematuria  
toxic epidermal necrolysis  
ulcer  
hepatitis  
malaise  
purpura  
gastroenteritis  
neutropenia  
peripheral neuropathy  
thrombocytopenia  
muscle cramps  
pancytopenia  
sepsis  
galactorrhea  
syncope  
increased salivation  
urinary retention  
dyskinesia  
neurosis  
weakness  
impotence  
torticollis  
tachycardia  
dysphagia  
hypothyroidism  
menorrhagia  
paresthesia  
weight gain  
fatigue  
glycosuria  
nightmares  
priapism  
stomatitis  
leukopenia  
neutropenia  
dyspnea  
neuropathy  
hemorrhage

|                         |                             |
|-------------------------|-----------------------------|
| constitutional symptoms | pleural effusion            |
| constitutional symptoms | erythema                    |
| constitutional symptoms | infection                   |
| constitutional symptoms | pain                        |
| constitutional symptoms | peripheral edema            |
| constitutional symptoms | weight loss                 |
| constitutional symptoms | peripheral neuropathy       |
| constitutional symptoms | cough                       |
| constitutional symptoms | heart failure               |
| contact dermatitis      | hemorrhoids                 |
| contact dermatitis      | neck rigidity               |
| contact dermatitis      | polyuria                    |
| contact dermatitis      | tenesmus                    |
| contact dermatitis      | vaginal hemorrhage          |
| contact dermatitis      | vaginitis                   |
| cough                   | dyspnea                     |
| cough                   | infection                   |
| cough                   | leukopenia                  |
| cough                   | neutropenia                 |
| cough                   | stomatitis                  |
| cough                   | flushing                    |
| cough                   | malaise                     |
| cystitis                | ecchymosis                  |
| cystitis                | hematemesis                 |
| cystitis                | interstitial nephritis      |
| cystitis                | rectal hemorrhage           |
| cystitis                | herpes simplex              |
| cystitis                | eructation                  |
| cystitis                | gastritis                   |
| cystitis                | lymphadenopathy             |
| cystitis                | peptic ulcer                |
| cystitis                | exfoliative dermatitis      |
| cystitis                | toxic epidermal necrolysis  |
| cystitis                | glossitis                   |
| cystitis                | hearing loss                |
| cystitis                | melena                      |
| cystitis                | tinnitus                    |
| cystitis                | gastrointestinal hemorrhage |
| cystitis                | erythema multiforme         |
| cystitis                | dysuria                     |
| cystitis                | flatulence                  |
| cystitis                | hepatic failure             |
| cystitis                | proteinuria                 |
| cystitis                | heartburn                   |
| cystitis                | ulcerative stomatitis       |
| cystitis                | hemolytic anemia            |
| cystitis                | hepatitis                   |
| cystitis                | pancytopenia                |
| cystitis                | sepsis                      |
| cystitis                | hematuria                   |
| cystitis                | jaundice                    |
| cystitis                | pancreatitis                |
| cystitis                | esophagitis                 |
| cystitis                | myocardial infarction       |

|                  |                          |
|------------------|--------------------------|
| cystitis         | stomatitis               |
| deafness         | fecal incontinence       |
| deafness         | hyperhidrosis            |
| deafness         | ischemic colitis         |
| deafness         | leukocytosis             |
| deafness         | neuralgia                |
| deafness         | skin ulcer               |
| deafness         | suicide attempt          |
| decreased libido | dizziness                |
| decreased libido | lightheadedness          |
| decreased libido | sore throat              |
| decreased libido | mental depression        |
| decreased libido | psoriasis                |
| decreased libido | heart block              |
| decreased libido | fatigue                  |
| decreased libido | nightmares               |
| decreased libido | hypokalemia              |
| decreased libido | insomnia                 |
| dehydration      | heart failure            |
| dehydration      | weight loss              |
| delirium         | tachycardia              |
| delirium         | hallucinations           |
| delirium         | urinary incontinence     |
| delirium         | tremor                   |
| delirium         | torticollis              |
| delirium         | galactorrhea             |
| delirium         | laryngitis               |
| delirium         | priapism                 |
| delirium         | increased salivation     |
| delirium         | somnolence               |
| delirium         | tardive dyskinesia       |
| delirium         | urinary retention        |
| delirium         | dysmenorrhea             |
| delirium         | dysphagia                |
| delirium         | goiter                   |
| delirium         | personality disorder     |
| delirium         | urinary urgency          |
| delirium         | dyskinesia               |
| delirium         | hypotension              |
| delirium         | paralytic ileus          |
| delirium         | grand mal                |
| delirium         | paranoia                 |
| delirium         | sleep disorder           |
| delirium         | ventricular fibrillation |
| delirium         | ventricular tachycardia  |
| dermatitis       | stomatitis               |
| dermatitis       | infection                |
| dermatitis       | pancreatitis             |
| dermatitis       | hepatitis                |
| dermatitis       | neuropathy               |
| dermatitis       | vomiting                 |
| dermatitis       | erythema                 |
| dermatitis       | leukopenia               |
| dermatitis       | hypersensitivity         |

|                 |                               |
|-----------------|-------------------------------|
| dermatitis      | rash                          |
| dermatitis      | myalgia                       |
| dermatitis      | pleural effusion              |
| diarrhea        | rash                          |
| diarrhea        | thrombocytopenia              |
| diplopia        | hiccup                        |
| diplopia        | hallucinations                |
| diplopia        | laryngitis                    |
| diplopia        | urinary incontinence          |
| diplopia        | tremor                        |
| diplopia        | otitis media                  |
| diplopia        | phlebitis                     |
| diplopia        | hypotension                   |
| diplopia        | dysarthria                    |
| diplopia        | tachycardia                   |
| diplopia        | glossitis                     |
| diplopia        | hypoxia                       |
| diplopia        | hyperglycemia                 |
| diplopia        | shock                         |
| diplopia        | liver function tests abnormal |
| diplopia        | migraine                      |
| diplopia        | herpes simplex                |
| diplopia        | urinary frequency             |
| diplopia        | eructation                    |
| diplopia        | paralysis                     |
| diplopia        | pulmonary embolism            |
| diplopia        | sleep disorder                |
| diplopia        | ventricular fibrillation      |
| dizziness       | fatigue                       |
| dizziness       | lightheadedness               |
| dizziness       | sore throat                   |
| dizziness       | mental depression             |
| dizziness       | psoriasis                     |
| dizziness       | weakness                      |
| dizziness       | flushing                      |
| dizziness       | heart block                   |
| dizziness       | nightmares                    |
| dizziness       | syncope                       |
| drug dependence | fecal impaction               |
| drug dependence | glaucoma                      |
| drug dependence | hyperacusis                   |
| drug dependence | hypothermia                   |
| drug dependence | hypoventilation               |
| drug dependence | labyrinthitis                 |
| drug dependence | pyelonephritis                |
| drug dependence | sneezing                      |
| drug dependence | stridor                       |
| drug dependence | urinary hesitancy             |
| drug dependence | ventricular extrasystoles     |
| drug dependence | voice alteration              |
| drug dependence | wheezing                      |
| dry mouth       | priapism                      |
| dry mouth       | increased salivation          |
| dry mouth       | tardive dyskinesia            |

|            |                                |
|------------|--------------------------------|
| dry mouth  | spasm                          |
| dry mouth  | sweating                       |
| dry mouth  | palpitations                   |
| dry mouth  | paralytic ileus                |
| dry mouth  | heart block                    |
| dry mouth  | torticollis                    |
| dry mouth  | impotence                      |
| dry mouth  | nasal congestion               |
| dry mouth  | tachycardia                    |
| dry mouth  | galactorrhea                   |
| dry mouth  | nightmares                     |
| dry mouth  | postural hypotension           |
| dry mouth  | grand mal                      |
| dry mouth  | paranoia                       |
| dry mouth  | ventricular tachycardia        |
| dry mouth  | somnolence                     |
| dry mouth  | urinary retention              |
| dry mouth  | dyskinesia                     |
| dry mouth  | psoriasis                      |
| dry mouth  | tremor                         |
| dry mouth  | syncope                        |
| dry mouth  | dysmenorrhea                   |
| dry mouth  | goiter                         |
| dry mouth  | keratitis                      |
| dry mouth  | personality disorder           |
| dry mouth  | serotonin syndrome             |
| dry mouth  | supraventricular extrasystoles |
| dry mouth  | weight gain                    |
| dry mouth  | gynecomastia                   |
| dry mouth  | hypotension                    |
| dry mouth  | insomnia                       |
| dry mouth  | lightheadedness                |
| dry mouth  | photophobia                    |
| dry mouth  | sore throat                    |
| dry skin   | gastritis                      |
| dry skin   | gastrointestinal hemorrhage    |
| dry skin   | hematemesis                    |
| dry skin   | interstitial nephritis         |
| dry skin   | rectal hemorrhage              |
| dry skin   | liver function tests abnormal  |
| dry skin   | migraine                       |
| dry skin   | eructation                     |
| dry skin   | otitis media                   |
| dry skin   | phlebitis                      |
| dry skin   | pulmonary embolism             |
| dry skin   | exfoliative dermatitis         |
| dry skin   | toxic epidermal necrolysis     |
| dry skin   | dysarthria                     |
| dry skin   | hiccup                         |
| dry skin   | lymphadenopathy                |
| dry skin   | neurosis                       |
| dry skin   | stomatitis                     |
| dysarthria | hiccup                         |
| dysarthria | tremor                         |

|            |                                |
|------------|--------------------------------|
| dysarthria | hypoxia                        |
| dysarthria | hallucinations                 |
| dysarthria | laryngitis                     |
| dysarthria | urinary incontinence           |
| dysarthria | liver function tests abnormal  |
| dysarthria | migraine                       |
| dysarthria | hypotension                    |
| dysarthria | otitis media                   |
| dysarthria | phlebitis                      |
| dysarthria | pulmonary embolism             |
| dysarthria | tachycardia                    |
| dysarthria | lymphadenopathy                |
| dysarthria | nervousness                    |
| dysarthria | neurosis                       |
| dyskinesia | increased salivation           |
| dyskinesia | urinary retention              |
| dyskinesia | torticollis                    |
| dyskinesia | galactorrhea                   |
| dyskinesia | priapism                       |
| dyskinesia | syncope                        |
| dyskinesia | impotence                      |
| dyskinesia | tachycardia                    |
| dyskinesia | tardive dyskinesia             |
| dyskinesia | nervousness                    |
| dyskinesia | postural hypotension           |
| dyskinesia | insomnia                       |
| dyskinesia | paralytic ileus                |
| dyskinesia | nasal congestion               |
| dyskinesia | nightmares                     |
| dyskinesia | grand mal                      |
| dyskinesia | paranoia                       |
| dyskinesia | photophobia                    |
| dyskinesia | ventricular tachycardia        |
| dyskinesia | tremor                         |
| dyskinesia | somnolence                     |
| dyskinesia | hypotension                    |
| dyskinesia | palpitations                   |
| dyskinesia | gynecomastia                   |
| dyskinesia | neurosis                       |
| dyskinesia | psoriasis                      |
| dyskinesia | spasm                          |
| dyskinesia | sweating                       |
| dyskinesia | heart block                    |
| dyskinesia | dysmenorrhea                   |
| dyskinesia | dysphagia                      |
| dyskinesia | goiter                         |
| dyskinesia | hypothyroidism                 |
| dyskinesia | keratitis                      |
| dyskinesia | menorrhagia                    |
| dyskinesia | personality disorder           |
| dyskinesia | psychosis                      |
| dyskinesia | serotonin syndrome             |
| dyskinesia | supraventricular extrasystoles |
| dyskinesia | urinary urgency                |



|              |                                   |
|--------------|-----------------------------------|
| dyskinesia   | weight gain                       |
| dyskinesia   | glycosuria                        |
| dyskinesia   | hallucinations                    |
| dyskinesia   | urinary incontinence              |
| dysmenorrhea | goiter                            |
| dysmenorrhea | personality disorder              |
| dysmenorrhea | grand mal                         |
| dysmenorrhea | paranoia                          |
| dysmenorrhea | ventricular tachycardia           |
| dysmenorrhea | psoriasis                         |
| dysmenorrhea | seizures                          |
| dysmenorrhea | spasm                             |
| dysmenorrhea | sweating                          |
| dysmenorrhea | heart block                       |
| dysmenorrhea | torticollis                       |
| dysmenorrhea | galactorrhea                      |
| dysmenorrhea | hallucinations                    |
| dysmenorrhea | nightmares                        |
| dysmenorrhea | priapism                          |
| dysmenorrhea | syncope                           |
| dysmenorrhea | urinary incontinence              |
| dysmenorrhea | increased salivation              |
| dysmenorrhea | somnolence                        |
| dysmenorrhea | tardive dyskinesia                |
| dysmenorrhea | urinary retention                 |
| dysmenorrhea | hypotension                       |
| dysmenorrhea | insomnia                          |
| dysmenorrhea | palpitations                      |
| dysmenorrhea | paralytic ileus                   |
| dysmenorrhea | impotence                         |
| dysmenorrhea | nasal congestion                  |
| Dyspepsia    | abdominal pain                    |
| Dyspepsia    | conjunctivitis                    |
| Dyspepsia    | epistaxis                         |
| Dyspepsia    | angioedema                        |
| Dyspepsia    | infection                         |
| Dyspepsia    | pancreatitis                      |
| Dyspepsia    | toxic epidermal necrolysis        |
| Dyspepsia    | alopecia                          |
| Dyspepsia    | erythema multiforme               |
| Dyspepsia    | malaise                           |
| Dyspepsia    | hepatitis                         |
| Dyspepsia    | hypersensitivity                  |
| Dyspepsia    | Sinusitis                         |
| Dyspepsia    | pneumonia                         |
| Dyspepsia    | vertigo                           |
| Dyspepsia    | flatulence                        |
| Dyspepsia    | upper respiratory tract infection |
| Dyspepsia    | exfoliative dermatitis            |
| Dyspepsia    | Influenza                         |
| Dyspepsia    | Pharyngitis                       |
| Dyspepsia    | hematemesis                       |
| Dyspepsia    | interstitial nephritis            |
| Dyspepsia    | photosensitivity                  |

|           |                             |
|-----------|-----------------------------|
| Dyspepsia | rectal hemorrhage           |
| Dyspepsia | purpura                     |
| Dyspepsia | anaphylaxis                 |
| Dyspepsia | rash                        |
| Dyspepsia | asthenia                    |
| Dyspepsia | Stevens – Johnson syndrome  |
| Dyspepsia | myalgia                     |
| Dyspepsia | proteinuria                 |
| Dyspepsia | ulcer                       |
| Dyspepsia | vasculitis                  |
| Dyspepsia | aplastic anemia             |
| Dyspepsia | gastroenteritis             |
| Dyspepsia | hearing loss                |
| Dyspepsia | hyperkalemia                |
| Dyspepsia | melena                      |
| Dyspepsia | tinnitus                    |
| Dyspepsia | rhinitis                    |
| dysphagia | torticollis                 |
| dysphagia | galactorrhea                |
| dysphagia | priapism                    |
| dysphagia | increased salivation        |
| dysphagia | tardive dyskinesia          |
| dysphagia | urinary retention           |
| dysphagia | paralytic ileus             |
| dysphagia | weight loss                 |
| dyspnea   | stomatitis                  |
| dyspnea   | neutropenia                 |
| dyspnea   | infection                   |
| dyspnea   | leukopenia                  |
| dyspnea   | hemorrhage                  |
| dyspnea   | thrombocytopenia            |
| dyspnea   | pancreatitis                |
| dyspnea   | edema                       |
| dyspnea   | erythema multiforme         |
| dyspnea   | hypersensitivity            |
| dyspnea   | neuropathy                  |
| dyspnea   | renal failure               |
| dyspnea   | hematuria                   |
| dyspnea   | malaise                     |
| dyspnea   | toxic epidermal necrolysis  |
| dyspnea   | hyperkalemia                |
| dyspnea   | peripheral edema            |
| dysuria   | eructation                  |
| dysuria   | herpes simplex              |
| dysuria   | peptic ulcer                |
| dysuria   | gastrointestinal hemorrhage |
| dysuria   | gastritis                   |
| dysuria   | glossitis                   |
| dysuria   | hearing loss                |
| dysuria   | melena                      |
| dysuria   | pancytopenia                |
| dysuria   | sepsis                      |
| dysuria   | ecchymosis                  |
| dysuria   | hematemesis                 |

|            |                             |
|------------|-----------------------------|
| dysuria    | interstitial nephritis      |
| dysuria    | rectal hemorrhage           |
| dysuria    | hepatic failure             |
| dysuria    | proteinuria                 |
| dysuria    | hemolytic anemia            |
| dysuria    | esophagitis                 |
| dysuria    | lymphadenopathy             |
| dysuria    | hypoxia                     |
| dysuria    | tinnitus                    |
| dysuria    | hematuria                   |
| dysuria    | stomatitis                  |
| dysuria    | tremor                      |
| dysuria    | heartburn                   |
| dysuria    | exfoliative dermatitis      |
| dysuria    | toxic epidermal necrolysis  |
| dysuria    | hepatitis                   |
| dysuria    | flatulence                  |
| dysuria    | ulcer                       |
| dysuria    | vasculitis                  |
| ecchymosis | gastritis                   |
| ecchymosis | hematemesis                 |
| ecchymosis | interstitial nephritis      |
| ecchymosis | rectal hemorrhage           |
| ecchymosis | toxic epidermal necrolysis  |
| ecchymosis | herpes simplex              |
| ecchymosis | gastrointestinal hemorrhage |
| ecchymosis | esophagitis                 |
| ecchymosis | peptic ulcer                |
| ecchymosis | eructation                  |
| ecchymosis | hearing loss                |
| ecchymosis | melena                      |
| ecchymosis | pancytopenia                |
| ecchymosis | sepsis                      |
| ecchymosis | hematuria                   |
| ecchymosis | jaundice                    |
| ecchymosis | hepatitis                   |
| ecchymosis | exfoliative dermatitis      |
| ecchymosis | flatulence                  |
| ecchymosis | hepatic failure             |
| ecchymosis | proteinuria                 |
| ecchymosis | ulcer                       |
| ecchymosis | hemolytic anemia            |
| ecchymosis | pancreatitis                |
| ecchymosis | erythema multiforme         |
| ecchymosis | pneumonia                   |
| ecchymosis | lymphadenopathy             |
| ecchymosis | pruritus                    |
| ecchymosis | stomatitis                  |
| ecchymosis | gastroenteritis             |
| ecchymosis | glossitis                   |
| ecchymosis | tinnitus                    |
| ecchymosis | photosensitivity            |
| ecchymosis | heartburn                   |
| ecchymosis | ulcerative stomatitis       |

|                        |                                   |
|------------------------|-----------------------------------|
| ecchymosis             | vasculitis                        |
| ecchymosis             | renal failure                     |
| ecchymosis             | thrombocytopenia                  |
| eczema                 | purpura                           |
| eczema                 | weight gain                       |
| eczema                 | flatulence                        |
| eczema                 | insomnia                          |
| eczema                 | palpitations                      |
| eczema                 | grand mal                         |
| eczema                 | paranoia                          |
| eczema                 | ventricular tachycardia           |
| edema                  | fever                             |
| edema                  | hematuria                         |
| edema                  | purpura                           |
| edema                  | infection                         |
| elevated liver enzymes | pelvic pain                       |
| eosinophilia           | pancytopenia                      |
| eosinophilia           | purpura                           |
| eosinophilia           | jaundice                          |
| eosinophilia           | exfoliative dermatitis            |
| eosinophilia           | esophagitis                       |
| eosinophilia           | peptic ulcer                      |
| eosinophilia           | pruritus                          |
| epistaxis              | pancreatitis                      |
| epistaxis              | infection                         |
| epistaxis              | upper respiratory tract infection |
| epistaxis              | toxic epidermal necrolysis        |
| epistaxis              | malaise                           |
| epistaxis              | erythema multiforme               |
| epistaxis              | peripheral neuropathy             |
| epistaxis              | fever                             |
| epistaxis              | purpura                           |
| epistaxis              | pneumonia                         |
| epistaxis              | hepatitis                         |
| epistaxis              | hypersensitivity                  |
| epistaxis              | muscle cramps                     |
| epistaxis              | gastroenteritis                   |
| epistaxis              | hematuria                         |
| epistaxis              | jaundice                          |
| eructation             | herpes simplex                    |
| eructation             | glossitis                         |
| eructation             | gastrointestinal hemorrhage       |
| eructation             | gastritis                         |
| eructation             | hematemesis                       |
| eructation             | interstitial nephritis            |
| eructation             | rectal hemorrhage                 |
| eructation             | lymphadenopathy                   |
| eructation             | peptic ulcer                      |
| eructation             | hearing loss                      |
| eructation             | hypoxia                           |
| eructation             | melena                            |
| eructation             | tinnitus                          |
| eructation             | hallucinations                    |
| eructation             | laryngitis                        |

|                     |                               |
|---------------------|-------------------------------|
| eructation          | urinary incontinence          |
| eructation          | otitis media                  |
| eructation          | phlebitis                     |
| eructation          | sleep disorder                |
| eructation          | tremor                        |
| eructation          | flatulence                    |
| eructation          | hepatic failure               |
| eructation          | proteinuria                   |
| eructation          | urinary frequency             |
| eructation          | exfoliative dermatitis        |
| eructation          | toxic epidermal necrolysis    |
| eructation          | hemolytic anemia              |
| eructation          | esophagitis                   |
| eructation          | hiccup                        |
| eructation          | hepatitis                     |
| eructation          | erythema multiforme           |
| eructation          | pancytopenia                  |
| eructation          | sepsis                        |
| eructation          | hematuria                     |
| eructation          | tachycardia                   |
| eructation          | heartburn                     |
| eructation          | liver function tests abnormal |
| eructation          | migraine                      |
| eructation          | ulcerative stomatitis         |
| eructation          | hyperglycemia                 |
| eructation          | photosensitivity              |
| eructation          | jaundice                      |
| eructation          | stomatitis                    |
| erythema            | neutropenia                   |
| erythema            | stomatitis                    |
| erythema            | peripheral edema              |
| erythema            | leukopenia                    |
| erythema            | hemorrhage                    |
| erythema            | pleural effusion              |
| erythema            | weight loss                   |
| erythema            | neuropathy                    |
| erythema multiforme | exfoliative dermatitis        |
| erythema multiforme | toxic epidermal necrolysis    |
| erythema multiforme | pancreatitis                  |
| erythema multiforme | peripheral neuropathy         |
| erythema multiforme | hematemesis                   |
| erythema multiforme | interstitial nephritis        |
| erythema multiforme | rectal hemorrhage             |
| erythema multiforme | gastrointestinal hemorrhage   |
| erythema multiforme | gastritis                     |
| erythema multiforme | renal failure                 |
| erythema multiforme | hearing loss                  |
| erythema multiforme | melena                        |
| erythema multiforme | sepsis                        |
| erythema multiforme | stomatitis                    |
| erythema multiforme | hematuria                     |
| erythema multiforme | peptic ulcer                  |
| erythema multiforme | leukopenia                    |
| erythema multiforme | hepatic failure               |

|                        |                             |
|------------------------|-----------------------------|
| erythema multiforme    | proteinuria                 |
| erythema multiforme    | vasculitis                  |
| erythema multiforme    | thrombocytopenia            |
| erythema multiforme    | infection                   |
| erythema multiforme    | tinnitus                    |
| erythema multiforme    | hemolytic anemia            |
| erythema multiforme    | hemorrhage                  |
| erythema multiforme    | pneumonia                   |
| erythema multiforme    | photosensitivity            |
| erythema multiforme    | pulmonary edema             |
| erythema multiforme    | pancytopenia                |
| esophagitis            | ulcer                       |
| esophagitis            | gastritis                   |
| esophagitis            | pneumonia                   |
| esophagitis            | pancytopenia                |
| esophagitis            | sepsis                      |
| esophagitis            | hematuria                   |
| esophagitis            | peptic ulcer                |
| esophagitis            | pruritus                    |
| esophagitis            | toxic epidermal necrolysis  |
| esophagitis            | gastroenteritis             |
| esophagitis            | hearing loss                |
| esophagitis            | melena                      |
| esophagitis            | gastrointestinal hemorrhage |
| esophagitis            | hematemesis                 |
| esophagitis            | interstitial nephritis      |
| esophagitis            | rectal hemorrhage           |
| esophagitis            | thrombocytopenia            |
| esophagitis            | flatulence                  |
| esophagitis            | hepatic failure             |
| esophagitis            | herpes simplex              |
| esophagitis            | proteinuria                 |
| esophagitis            | vasculitis                  |
| esophagitis            | hemolytic anemia            |
| esophagitis            | renal failure               |
| esophagitis            | hepatitis                   |
| esophagitis            | jaundice                    |
| esophagitis            | pancreatitis                |
| esophagitis            | exfoliative dermatitis      |
| esophagitis            | lymphadenopathy             |
| esophagitis            | stomatitis                  |
| esophagitis            | hematemesis                 |
| exfoliative dermatitis | interstitial nephritis      |
| exfoliative dermatitis | rectal hemorrhage           |
| exfoliative dermatitis | gastritis                   |
| exfoliative dermatitis | hearing loss                |
| exfoliative dermatitis | melena                      |
| exfoliative dermatitis | pancreatitis                |
| exfoliative dermatitis | toxic epidermal necrolysis  |
| exfoliative dermatitis | peptic ulcer                |
| exfoliative dermatitis | hepatic failure             |
| exfoliative dermatitis | proteinuria                 |
| exfoliative dermatitis | vasculitis                  |
| exfoliative dermatitis | purpura                     |

|                        |                                   |
|------------------------|-----------------------------------|
| exfoliative dermatitis | hemolytic anemia                  |
| exfoliative dermatitis | tinnitus                          |
| exfoliative dermatitis | pneumonia                         |
| exfoliative dermatitis | renal failure                     |
| exfoliative dermatitis | photosensitivity                  |
| exfoliative dermatitis | gastrointestinal hemorrhage       |
| exfoliative dermatitis | pancytopenia                      |
| exfoliative dermatitis | sepsis                            |
| exfoliative dermatitis | hematuria                         |
| exfoliative dermatitis | flatulence                        |
| exfoliative dermatitis | herpes simplex                    |
| exfoliative dermatitis | ulcer                             |
| exfoliative dermatitis | lymphadenopathy                   |
| exfoliative dermatitis | jaundice                          |
| exfoliative dermatitis | hepatitis                         |
| fatigue                | psoriasis                         |
| fatigue                | heart block                       |
| fatigue                | nightmares                        |
| fatigue                | syncope                           |
| fatigue                | weight gain                       |
| fatigue                | insomnia                          |
| fatigue                | palpitations                      |
| fatigue                | flushing                          |
| fatigue                | grand mal                         |
| fatigue                | lightheadedness                   |
| fatigue                | paranoia                          |
| fatigue                | sore throat                       |
| fatigue                | ventricular tachycardia           |
| fecal impaction        | glaucoma                          |
| fecal impaction        | hyperacusis                       |
| fecal impaction        | hypothermia                       |
| fecal impaction        | hypoventilation                   |
| fecal impaction        | labyrinthitis                     |
| fecal impaction        | pyelonephritis                    |
| fecal impaction        | sneezing                          |
| fecal impaction        | stridor                           |
| fecal impaction        | urinary hesitancy                 |
| fecal impaction        | ventricular extrasystoles         |
| fecal impaction        | voice alteration                  |
| fecal impaction        | wheezing                          |
| fecal incontinence     | hyperhidrosis                     |
| fecal incontinence     | ischemic colitis                  |
| fecal incontinence     | leukocytosis                      |
| fecal incontinence     | neuralgia                         |
| fecal incontinence     | skin ulcer                        |
| fecal incontinence     | suicide attempt                   |
| fever                  | infection                         |
| fever                  | malaise                           |
| fever                  | hypersensitivity                  |
| fever                  | upper respiratory tract infection |
| fever                  | pancreatitis                      |
| fever                  | stomatitis                        |
| flatulence             | hematemesis                       |
| flatulence             | interstitial nephritis            |

|              |                             |
|--------------|-----------------------------|
| flatulence   | photosensitivity            |
| flatulence   | rectal hemorrhage           |
| flatulence   | ulcer                       |
| flatulence   | vasculitis                  |
| flatulence   | toxic epidermal necrolysis  |
| flatulence   | hepatitis                   |
| flatulence   | lymphadenopathy             |
| flatulence   | peptic ulcer                |
| flatulence   | pruritus                    |
| flatulence   | gastritis                   |
| flatulence   | renal failure               |
| flatulence   | thrombocytopenia            |
| flatulence   | hearing loss                |
| flatulence   | melena                      |
| flatulence   | tinnitus                    |
| flatulence   | purpura                     |
| flatulence   | jaundice                    |
| flatulence   | urticaria                   |
| flatulence   | hepatic failure             |
| flatulence   | herpes simplex              |
| flatulence   | proteinuria                 |
| flatulence   | gastrointestinal hemorrhage |
| flushing     | hypokalemia                 |
| flushing     | pulmonary edema             |
| galactorrhea | increased salivation        |
| galactorrhea | urinary retention           |
| galactorrhea | tachycardia                 |
| galactorrhea | nightmares                  |
| galactorrhea | priapism                    |
| galactorrhea | tardive dyskinesia          |
| galactorrhea | sweating                    |
| galactorrhea | paralytic ileus             |
| galactorrhea | heart block                 |
| galactorrhea | torticollis                 |
| galactorrhea | impotence                   |
| galactorrhea | syncope                     |
| galactorrhea | grand mal                   |
| galactorrhea | paranoia                    |
| galactorrhea | ventricular tachycardia     |
| galactorrhea | hypotension                 |
| galactorrhea | insomnia                    |
| galactorrhea | palpitations                |
| galactorrhea | nervousness                 |
| galactorrhea | neurosis                    |
| galactorrhea | psoriasis                   |
| galactorrhea | spasm                       |
| galactorrhea | nasal congestion            |
| galactorrhea | postural hypotension        |
| galactorrhea | tremor                      |
| galactorrhea | glycosuria                  |
| galactorrhea | hallucinations              |
| galactorrhea | urinary incontinence        |
| galactorrhea | goiter                      |
| galactorrhea | hypothyroidism              |



|                 |                                |
|-----------------|--------------------------------|
| galactorrhea    | keratitis                      |
| galactorrhea    | menorrhagia                    |
| galactorrhea    | personality disorder           |
| galactorrhea    | serotonin syndrome             |
| galactorrhea    | supraventricular extrasystoles |
| galactorrhea    | urinary urgency                |
| galactorrhea    | weight gain                    |
| galactorrhea    | gynecomastia                   |
| galactorrhea    | somnolence                     |
| galactorrhea    | lightheadedness                |
| galactorrhea    | photophobia                    |
| galactorrhea    | sore throat                    |
| gastritis       | hematemesis                    |
| gastritis       | interstitial nephritis         |
| gastritis       | rectal hemorrhage              |
| gastritis       | gastrointestinal hemorrhage    |
| gastritis       | herpes simplex                 |
| gastritis       | hearing loss                   |
| gastritis       | melen                          |
| gastritis       | toxic epidermal necrolysis     |
| gastritis       | stomatitis                     |
| gastritis       | sepsis                         |
| gastritis       | hematuria                      |
| gastritis       | lymphadenopathy                |
| gastritis       | peptic ulcer                   |
| gastritis       | hepatic failure                |
| gastritis       | proteinuria                    |
| gastritis       | ulcer                          |
| gastritis       | pancreatitis                   |
| gastritis       | glossitis                      |
| gastritis       | pneumonia                      |
| gastritis       | pancytopenia                   |
| gastritis       | hepatitis                      |
| gastritis       | vasculitis                     |
| gastritis       | jaundice                       |
| gastritis       | hemolytic anemia               |
| gastritis       | pruritus                       |
| gastritis       | renal failure                  |
| gastritis       | gastroenteritis                |
| gastritis       | tinnitus                       |
| gastritis       | heartburn                      |
| gastritis       | liver function tests abnormal  |
| gastritis       | migraine                       |
| gastritis       | ulcerative stomatitis          |
| gastritis       | thrombocytopenia               |
| gastritis       | photosensitivity               |
| gastroenteritis | pneumonia                      |
| gastroenteritis | hepatitis                      |
| gastroenteritis | hyperkalemia                   |
| gastroenteritis | toxic epidermal necrolysis     |
| gastroenteritis | pancreatitis                   |
| gastroenteritis | herpes simplex                 |
| gastroenteritis | proteinuria                    |
| gastroenteritis | ulcer                          |

|                             |                            |
|-----------------------------|----------------------------|
| gastroenteritis             | hemolytic anemia           |
| gastroenteritis             | hypersensitivity           |
| gastroenteritis             | pancytopenia               |
| gastroenteritis             | sepsis                     |
| gastroenteritis             | hematuria                  |
| gastroesophageal reflux     | gingivitis                 |
| gastrointestinal hemorrhage | toxic epidermal necrolysis |
| gastrointestinal hemorrhage | herpes simplex             |
| gastrointestinal hemorrhage | sepsis                     |
| gastrointestinal hemorrhage | hematemesis                |
| gastrointestinal hemorrhage | interstitial nephritis     |
| gastrointestinal hemorrhage | rectal hemorrhage          |
| gastrointestinal hemorrhage | glossitis                  |
| gastrointestinal hemorrhage | hearing loss               |
| gastrointestinal hemorrhage | melen                      |
| gastrointestinal hemorrhage | hematuria                  |
| gastrointestinal hemorrhage | stomatitis                 |
| gastrointestinal hemorrhage | pneumonia                  |
| gastrointestinal hemorrhage | renal failure              |
| gastrointestinal hemorrhage | lymphadenopathy            |
| gastrointestinal hemorrhage | peptic ulcer               |
| gastrointestinal hemorrhage | thrombocytopenia           |
| gastrointestinal hemorrhage | hepatic failure            |
| gastrointestinal hemorrhage | proteinuria                |
| gastrointestinal hemorrhage | ulcer                      |
| gastrointestinal hemorrhage | tinnitus                   |
| gastrointestinal hemorrhage | peripheral neuropathy      |
| gastrointestinal hemorrhage | otitis media               |
| gastrointestinal hemorrhage | phlebitis                  |
| gastrointestinal hemorrhage | hepatitis                  |
| gastrointestinal hemorrhage | pancytopenia               |
| gastrointestinal hemorrhage | leukopenia                 |
| gastrointestinal hemorrhage | heart failure              |
| gastrointestinal hemorrhage | vasculitis                 |
| gastrointestinal hemorrhage | hiccup                     |
| gastrointestinal hemorrhage | nocturia                   |
| gastrointestinal hemorrhage | pruritus                   |
| glaucoma                    | hyperacusis                |
| glaucoma                    | hypothermia                |
| glaucoma                    | hypoventilation            |
| glaucoma                    | labyrinthitis              |
| glaucoma                    | pyelonephritis             |
| glaucoma                    | sneezing                   |
| glaucoma                    | stridor                    |
| glaucoma                    | urinary hesitancy          |
| glaucoma                    | ventricular extrasystoles  |
| glaucoma                    | voice alteration           |
| glaucoma                    | wheezing                   |
| glossitis                   | herpes simplex             |
| glossitis                   | otitis media               |
| glossitis                   | phlebitis                  |
| glossitis                   | hiccup                     |
| glossitis                   | lymphadenopathy            |
| glossitis                   | tremor                     |

|            |                               |
|------------|-------------------------------|
| glossitis  | hypoxia                       |
| glossitis  | tinnitus                      |
| glossitis  | hallucinations                |
| glossitis  | hematemesis                   |
| glossitis  | hyperglycemia                 |
| glossitis  | interstitial nephritis        |
| glossitis  | laryngitis                    |
| glossitis  | rectal hemorrhage             |
| glossitis  | urinary incontinence          |
| glossitis  | urinary frequency             |
| glossitis  | heartburn                     |
| glossitis  | liver function tests abnormal |
| glossitis  | migraine                      |
| glossitis  | ulcerative stomatitis         |
| glossitis  | hypotension                   |
| glossitis  | pulmonary embolism            |
| glossitis  | sleep disorder                |
| glossitis  | ventricular fibrillation      |
| glossitis  | tachycardia                   |
| glossitis  | hepatitis                     |
| glycosuria | hyperglycemia                 |
| glycosuria | increased salivation          |
| glycosuria | impotence                     |
| glycosuria | tachycardia                   |
| glycosuria | priapism                      |
| glycosuria | paresthesia                   |
| glycosuria | tardive dyskinesia            |
| glycosuria | urinary retention             |
| glycosuria | palpitations                  |
| glycosuria | paralytic ileus               |
| glycosuria | paralysis                     |
| glycosuria | rhabdomyolysis                |
| goiter     | personality disorder          |
| goiter     | grand mal                     |
| goiter     | paranoia                      |
| goiter     | ventricular tachycardia       |
| goiter     | psoriasis                     |
| goiter     | seizures                      |
| goiter     | spasm                         |
| goiter     | sweating                      |
| goiter     | heart block                   |
| goiter     | torticollis                   |
| goiter     | hallucinations                |
| goiter     | nightmares                    |
| goiter     | priapism                      |
| goiter     | syncope                       |
| goiter     | urinary incontinence          |
| goiter     | increased salivation          |
| goiter     | somnolence                    |
| goiter     | tardive dyskinesia            |
| goiter     | urinary retention             |
| goiter     | hypotension                   |
| goiter     | insomnia                      |
| goiter     | palpitations                  |

|              |                                |
|--------------|--------------------------------|
| goiter       | paralytic ileus                |
| goiter       | impotence                      |
| goiter       | nasal congestion               |
| gout         | rhinitis                       |
| gout         | hyponatremia                   |
| gout         | hyperkalemia                   |
| gout         | hemolytic anemia               |
| gout         | palpitations                   |
| gout         | muscle cramps                  |
| grand mal    | paranoia                       |
| grand mal    | ventricular tachycardia        |
| grand mal    | psoriasis                      |
| grand mal    | sweating                       |
| grand mal    | heart block                    |
| grand mal    | torticollis                    |
| grand mal    | nightmares                     |
| grand mal    | priapism                       |
| grand mal    | syncope                        |
| grand mal    | increased salivation           |
| grand mal    | somnolence                     |
| grand mal    | tardive dyskinesia             |
| grand mal    | urinary retention              |
| grand mal    | hypotension                    |
| grand mal    | insomnia                       |
| grand mal    | palpitations                   |
| grand mal    | paralytic ileus                |
| grand mal    | keratitis                      |
| grand mal    | personality disorder           |
| grand mal    | serotonin syndrome             |
| grand mal    | supraventricular extrasystoles |
| grand mal    | weight gain                    |
| grand mal    | impotence                      |
| grand mal    | nasal congestion               |
| grand mal    | tachycardia                    |
| grand mal    | postural hypotension           |
| grand mal    | tremor                         |
| grand mal    | photophobia                    |
| grand mal    | nervousness                    |
| grand mal    | neurosis                       |
| grand mal    | seizures                       |
| grand mal    | spasm                          |
| grand mal    | hallucinations                 |
| grand mal    | urinary incontinence           |
| gynecomastia | paralytic ileus                |
| gynecomastia | tardive dyskinesia             |
| gynecomastia | nasal congestion               |
| gynecomastia | priapism                       |
| gynecomastia | increased salivation           |
| gynecomastia | torticollis                    |
| gynecomastia | postural hypotension           |
| gynecomastia | urinary retention              |
| gynecomastia | tachycardia                    |
| gynecomastia | spasm                          |
| gynecomastia | sweating                       |

|                |                               |
|----------------|-------------------------------|
| hallucinations | urinary incontinence          |
| hallucinations | tachycardia                   |
| hallucinations | laryngitis                    |
| hallucinations | tremor                        |
| hallucinations | hiccup                        |
| hallucinations | hypotension                   |
| hallucinations | hypoxia                       |
| hallucinations | otitis media                  |
| hallucinations | phlebitis                     |
| hallucinations | sleep disorder                |
| hallucinations | ventricular fibrillation      |
| hallucinations | somnolence                    |
| hallucinations | urinary frequency             |
| hallucinations | neurosis                      |
| hallucinations | nightmares                    |
| hallucinations | syncope                       |
| hallucinations | hypothyroidism                |
| hallucinations | liver function tests abnormal |
| hallucinations | menorrhagia                   |
| hallucinations | migraine                      |
| hallucinations | personality disorder          |
| hallucinations | herpes simplex                |
| hallucinations | increased salivation          |
| hallucinations | urinary retention             |
| hallucinations | insomnia                      |
| hallucinations | paranoia                      |
| hallucinations | pulmonary embolism            |
| hallucinations | ventricular tachycardia       |
| hearing loss   | melena                        |
| hearing loss   | hematemesis                   |
| hearing loss   | interstitial nephritis        |
| hearing loss   | rectal hemorrhage             |
| hearing loss   | hepatic failure               |
| hearing loss   | proteinuria                   |
| hearing loss   | peptic ulcer                  |
| hearing loss   | sepsis                        |
| hearing loss   | hematuria                     |
| hearing loss   | toxic epidermal necrolysis    |
| hearing loss   | ulcer                         |
| hearing loss   | vasculitis                    |
| hearing loss   | hemolytic anemia              |
| hearing loss   | pneumonia                     |
| hearing loss   | renal failure                 |
| hearing loss   | pancytopenia                  |
| hearing loss   | pancreatitis                  |
| hearing loss   | herpes simplex                |
| hearing loss   | heartburn                     |
| hearing loss   | stomatitis                    |
| hearing loss   | thrombocytopenia              |
| hearing loss   | hepatitis                     |
| heart block    | nightmares                    |
| heart block    | psoriasis                     |
| heart block    | sweating                      |
| heart block    | priapism                      |

|               |                                |
|---------------|--------------------------------|
| heart block   | increased salivation           |
| heart block   | tardive dyskinesia             |
| heart block   | urinary retention              |
| heart block   | lightheadedness                |
| heart block   | paranoia                       |
| heart block   | sore throat                    |
| heart block   | ventricular tachycardia        |
| heart block   | insomnia                       |
| heart block   | palpitations                   |
| heart block   | paralytic ileus                |
| heart block   | mental depression              |
| heart block   | spasm                          |
| heart block   | impotence                      |
| heart block   | nasal congestion               |
| heart block   | tachycardia                    |
| heart block   | postural hypotension           |
| heart block   | torticollis                    |
| heart block   | syncope                        |
| heart block   | somnolence                     |
| heart block   | keratitis                      |
| heart block   | memory loss                    |
| heart block   | personality disorder           |
| heart block   | serotonin syndrome             |
| heart block   | supraventricular extrasystoles |
| heart block   | weight gain                    |
| heart block   | hypotension                    |
| heart block   | photophobia                    |
| heart failure | neuropathy                     |
| heart failure | peripheral neuropathy          |
| heart failure | toxic epidermal necrolysis     |
| heart failure | pleural effusion               |
| heart failure | leukopenia                     |
| heart failure | thrombocytopenia               |
| heart failure | hypersensitivity               |
| heart failure | stomatitis                     |
| heart failure | infection                      |
| heart failure | neutropenia                    |
| heartburn     | peptic ulcer                   |
| heartburn     | melena                         |
| heartburn     | hematemesis                    |
| heartburn     | interstitial nephritis         |
| heartburn     | rectal hemorrhage              |
| heartburn     | hepatic failure                |
| heartburn     | herpes simplex                 |
| heartburn     | proteinuria                    |
| heartburn     | hemolytic anemia               |
| heartburn     | pancytopenia                   |
| heartburn     | sepsis                         |
| hematemesis   | interstitial nephritis         |
| hematemesis   | rectal hemorrhage              |
| hematemesis   | melena                         |
| hematemesis   | toxic epidermal necrolysis     |
| hematemesis   | hepatic failure                |
| hematemesis   | proteinuria                    |

|                  |                            |
|------------------|----------------------------|
| hematemesis      | peptic ulcer               |
| hematemesis      | sepsis                     |
| hematemesis      | hematuria                  |
| hematemesis      | herpes simplex             |
| hematemesis      | ulcer                      |
| hematemesis      | vasculitis                 |
| hematemesis      | hemolytic anemia           |
| hematemesis      | pancreatitis               |
| hematemesis      | pneumonia                  |
| hematemesis      | renal failure              |
| hematemesis      | lymphadenopathy            |
| hematemesis      | stomatitis                 |
| hematemesis      | pancytopenia               |
| hematemesis      | tinnitus                   |
| hematemesis      | jaundice                   |
| hematemesis      | hepatitis                  |
| hematemesis      | photosensitivity           |
| hematemesis      | ulcerative stomatitis      |
| hematemesis      | thrombocytopenia           |
| hematuria        | pneumonia                  |
| hematuria        | sepsis                     |
| hematuria        | melen                      |
| hematuria        | stomatitis                 |
| hematuria        | toxic epidermal necrolysis |
| hematuria        | interstitial nephritis     |
| hematuria        | rectal hemorrhage          |
| hematuria        | pancytopenia               |
| hematuria        | peptic ulcer               |
| hematuria        | hepatic failure            |
| hematuria        | proteinuria                |
| hematuria        | ulcer                      |
| hematuria        | pancreatitis               |
| hematuria        | thrombocytopenia           |
| hematuria        | hypersensitivity           |
| hematuria        | herpes simplex             |
| hematuria        | vasculitis                 |
| hematuria        | hepatitis                  |
| hematuria        | peripheral neuropathy      |
| hematuria        | jaundice                   |
| hematuria        | pruritus                   |
| hematuria        | leukopenia                 |
| hematuria        | hemolytic anemia           |
| hematuria        | infection                  |
| hematuria        | renal failure              |
| hematuria        | vertigo                    |
| hemolytic anemia | proteinuria                |
| hemolytic anemia | vasculitis                 |
| hemolytic anemia | peptic ulcer               |
| hemolytic anemia | hyperkalemia               |
| hemolytic anemia | melen                      |
| hemolytic anemia | hepatitis                  |
| hemolytic anemia | interstitial nephritis     |
| hemolytic anemia | rectal hemorrhage          |
| hemolytic anemia | pancreatitis               |

|                  |                            |
|------------------|----------------------------|
| hemolytic anemia | hepatic failure            |
| hemolytic anemia | toxic epidermal necrolysis |
| hemolytic anemia | hyponatremia               |
| hemolytic anemia | pneumonia                  |
| hemolytic anemia | renal failure              |
| hemolytic anemia | pancytopenia               |
| hemolytic anemia | sepsis                     |
| hemolytic anemia | tinnitus                   |
| hemolytic anemia | vertigo                    |
| hemolytic anemia | hyperuricemia              |
| hemolytic anemia | photosensitivity           |
| hemolytic anemia | jaundice                   |
| hemoptysis       | mouth ulceration           |
| hemoptysis       | petechiae                  |
| hemoptysis       | swelling                   |
| hemorrhage       | stomatitis                 |
| hemorrhage       | infection                  |
| hemorrhage       | pancreatitis               |
| hemorrhage       | peripheral edema           |
| hemorrhoids      | neck rigidity              |
| hemorrhoids      | polyuria                   |
| hemorrhoids      | tenesmus                   |
| hemorrhoids      | vaginal hemorrhage         |
| hemorrhoids      | vaginitis                  |
| hepatic failure  | melen                      |
| hepatic failure  | sepsis                     |
| hepatic failure  | interstitial nephritis     |
| hepatic failure  | rectal hemorrhage          |
| hepatic failure  | proteinuria                |
| hepatic failure  | peptic ulcer               |
| hepatic failure  | ulcer                      |
| hepatic failure  | vasculitis                 |
| hepatic failure  | toxic epidermal necrolysis |
| hepatic failure  | pneumonia                  |
| hepatic failure  | renal failure              |
| hepatic failure  | pancytopenia               |
| hepatic failure  | thrombocytopenia           |
| hepatic failure  | hyperkalemia               |
| hepatic failure  | stomatitis                 |
| hepatic failure  | jaundice                   |
| hepatic failure  | herpes simplex             |
| hepatitis        | jaundice                   |
| hepatitis        | pancreatitis               |
| hepatitis        | toxic epidermal necrolysis |
| hepatitis        | pneumonia                  |
| hepatitis        | herpes simplex             |
| hepatitis        | thrombocytopenia           |
| hepatitis        | pancytopenia               |
| hepatitis        | interstitial nephritis     |
| hepatitis        | photosensitivity           |
| hepatitis        | rectal hemorrhage          |
| hepatitis        | lymphadenopathy            |
| hepatitis        | peptic ulcer               |
| hepatitis        | pruritus                   |



|                |                                   |
|----------------|-----------------------------------|
| hepatitis      | upper respiratory tract infection |
| hepatitis      | proteinuria                       |
| hepatitis      | vasculitis                        |
| hepatitis      | muscle cramps                     |
| hepatitis      | sepsis                            |
| hepatitis      | hyperkalemia                      |
| hepatitis      | melena                            |
| hepatitis      | tinnitus                          |
| hepatitis      | vertigo                           |
| herpes simplex | lymphadenopathy                   |
| herpes simplex | tinnitus                          |
| herpes simplex | interstitial nephritis            |
| herpes simplex | rectal hemorrhage                 |
| herpes simplex | otitis media                      |
| herpes simplex | phlebitis                         |
| herpes simplex | toxic epidermal necrolysis        |
| herpes simplex | hiccup                            |
| herpes simplex | peptic ulcer                      |
| herpes simplex | pancytopenia                      |
| herpes simplex | sepsis                            |
| herpes simplex | hypoxia                           |
| herpes simplex | melena                            |
| herpes simplex | stomatitis                        |
| herpes simplex | jaundice                          |
| herpes simplex | tremor                            |
| herpes simplex | hyperglycemia                     |
| herpes simplex | laryngitis                        |
| herpes simplex | urinary incontinence              |
| herpes simplex | liver function tests abnormal     |
| herpes simplex | migraine                          |
| herpes simplex | ulcerative stomatitis             |
| herpes simplex | proteinuria                       |
| herpes simplex | ulcer                             |
| herpes simplex | urinary frequency                 |
| herpes zoster  | menstrual disorder                |
| hiccup         | laryngitis                        |
| hiccup         | urinary incontinence              |
| hiccup         | hypotension                       |
| hiccup         | otitis media                      |
| hiccup         | phlebitis                         |
| hiccup         | tachycardia                       |
| hiccup         | tremor                            |
| hiccup         | hypoxia                           |
| hiccup         | urinary frequency                 |
| hiccup         | liver function tests abnormal     |
| hiccup         | migraine                          |
| hiccup         | pulmonary embolism                |
| hiccup         | sleep disorder                    |
| hiccup         | ventricular fibrillation          |
| hiccup         | lymphadenopathy                   |
| hiccup         | nervousness                       |
| hiccup         | neurosis                          |
| hyperacusis    | hypothermia                       |
| hyperacusis    | hypoventilation                   |

|                      |                            |
|----------------------|----------------------------|
| hyperacusis          | labyrinthitis              |
| hyperacusis          | pyelonephritis             |
| hyperacusis          | sneezing                   |
| hyperacusis          | stridor                    |
| hyperacusis          | urinary hesitancy          |
| hyperacusis          | ventricular extrasystoles  |
| hyperacusis          | voice alteration           |
| hyperacusis          | wheezing                   |
| hypercholesterolemia | nephrotic syndrome         |
| hyperglycemia        | tinnitus                   |
| hyperglycemia        | photosensitivity           |
| hyperglycemia        | paresthesia                |
| hyperglycemia        | urinary frequency          |
| hyperglycemia        | palpitations               |
| hyperglycemia        | otitis media               |
| hyperglycemia        | paralysis                  |
| hyperglycemia        | phlebitis                  |
| hyperhidrosis        | ischemic colitis           |
| hyperhidrosis        | leukocytosis               |
| hyperhidrosis        | neuralgia                  |
| hyperhidrosis        | skin ulcer                 |
| hyperhidrosis        | suicide attempt            |
| hyperkalemia         | tinnitus                   |
| hyperkalemia         | proteinuria                |
| hyperkalemia         | vasculitis                 |
| hyperkalemia         | palpitations               |
| hyperkalemia         | pneumonia                  |
| hyperkalemia         | renal failure              |
| hyperkalemia         | rhinitis                   |
| hyperkalemia         | sepsis                     |
| hypersensitivity     | infection                  |
| hypersensitivity     | pneumonia                  |
| hypersensitivity     | thrombocytopenia           |
| hypersensitivity     | ulcer                      |
| hypersensitivity     | stomatitis                 |
| hypersensitivity     | toxic epidermal necrolysis |
| hypersensitivity     | leukopenia                 |
| hypersensitivity     | myalgia                    |
| hypersensitivity     | peripheral neuropathy      |
| hypersensitivity     | neutropenia                |
| hypersensitivity     | malaise                    |
| hyperuricemia        | vasculitis                 |
| hypoglycemia         | hyponatremia               |
| hypokalemia          | pleural effusion           |
| hypokalemia          | pulmonary edema            |
| hyponatremia         | muscle cramps              |
| hyponatremia         | rhinitis                   |
| hypotension          | urinary incontinence       |
| hypotension          | tachycardia                |
| hypotension          | neurosis                   |
| hypotension          | tremor                     |
| hypotension          | laryngitis                 |
| hypotension          | nightmares                 |
| hypotension          | syncope                    |

|                 |                                |
|-----------------|--------------------------------|
| hypotension     | otitis media                   |
| hypotension     | paranoia                       |
| hypotension     | phlebitis                      |
| hypotension     | ventricular fibrillation       |
| hypotension     | ventricular tachycardia        |
| hypotension     | increased salivation           |
| hypotension     | somnolence                     |
| hypotension     | urinary frequency              |
| hypotension     | urinary retention              |
| hypotension     | insomnia                       |
| hypotension     | palpitations                   |
| hypotension     | nervousness                    |
| hypotension     | psoriasis                      |
| hypotension     | seizures                       |
| hypotension     | sweating                       |
| hypotension     | impotence                      |
| hypotension     | hypoxia                        |
| hypotension     | torticollis                    |
| hypotension     | hypothyroidism                 |
| hypotension     | keratitis                      |
| hypotension     | liver function tests abnormal  |
| hypotension     | menorrhagia                    |
| hypotension     | migraine                       |
| hypotension     | personality disorder           |
| hypotension     | serotonin syndrome             |
| hypotension     | supraventricular extrasystoles |
| hypotension     | weight gain                    |
| hypotension     | priapism                       |
| hypothermia     | hypoventilation                |
| hypothermia     | labyrinthitis                  |
| hypothermia     | pyelonephritis                 |
| hypothermia     | sneezing                       |
| hypothermia     | stridor                        |
| hypothermia     | urinary hesitancy              |
| hypothermia     | ventricular extrasystoles      |
| hypothermia     | voice alteration               |
| hypothermia     | wheezing                       |
| hypothyroidism  | menorrhagia                    |
| hypothyroidism  | neurosis                       |
| hypothyroidism  | nightmares                     |
| hypothyroidism  | syncope                        |
| hypothyroidism  | urinary incontinence           |
| hypothyroidism  | increased salivation           |
| hypothyroidism  | urinary retention              |
| hypothyroidism  | insomnia                       |
| hypothyroidism  | impotence                      |
| hypoventilation | labyrinthitis                  |
| hypoventilation | pyelonephritis                 |
| hypoventilation | sneezing                       |
| hypoventilation | stridor                        |
| hypoventilation | urinary hesitancy              |
| hypoventilation | ventricular extrasystoles      |
| hypoventilation | voice alteration               |
| hypoventilation | wheezing                       |

|                      |                                |
|----------------------|--------------------------------|
| hypoxia              | tremor                         |
| hypoxia              | laryngitis                     |
| hypoxia              | urinary incontinence           |
| hypoxia              | urinary frequency              |
| hypoxia              | otitis media                   |
| hypoxia              | phlebitis                      |
| hypoxia              | sleep disorder                 |
| hypoxia              | tachycardia                    |
| hypoxia              | liver function tests abnormal  |
| hypoxia              | migraine                       |
| hypoxia              | pulmonary embolism             |
| hypoxia              | ventricular fibrillation       |
| impotence            | syncope                        |
| impotence            | increased salivation           |
| impotence            | urinary retention              |
| impotence            | tachycardia                    |
| impotence            | palpitations                   |
| impotence            | postural hypotension           |
| impotence            | nightmares                     |
| impotence            | priapism                       |
| impotence            | nervousness                    |
| impotence            | spasm                          |
| impotence            | sweating                       |
| impotence            | tardive dyskinesia             |
| impotence            | insomnia                       |
| impotence            | paralytic ileus                |
| impotence            | torticollis                    |
| impotence            | nasal congestion               |
| impotence            | paranoia                       |
| impotence            | photophobia                    |
| impotence            | ventricular tachycardia        |
| impotence            | somnolence                     |
| impotence            | tremor                         |
| impotence            | neurosis                       |
| impotence            | psoriasis                      |
| impotence            | weakness                       |
| impotence            | keratitis                      |
| impotence            | menorrhagia                    |
| impotence            | paresthesia                    |
| impotence            | personality disorder           |
| impotence            | psychosis                      |
| impotence            | serotonin syndrome             |
| impotence            | supraventricular extrasystoles |
| impotence            | weight gain                    |
| increased salivation | priapism                       |
| increased salivation | tachycardia                    |
| increased salivation | tardive dyskinesia             |
| increased salivation | urinary retention              |
| increased salivation | paralytic ileus                |
| increased salivation | torticollis                    |
| increased salivation | nightmares                     |
| increased salivation | spasm                          |
| increased salivation | sweating                       |
| increased salivation | palpitations                   |

|                      |                                   |
|----------------------|-----------------------------------|
| increased salivation | nasal congestion                  |
| increased salivation | syncope                           |
| increased salivation | postural hypotension              |
| increased salivation | paranoia                          |
| increased salivation | ventricular tachycardia           |
| increased salivation | insomnia                          |
| increased salivation | nervousness                       |
| increased salivation | neurosis                          |
| increased salivation | psoriasis                         |
| increased salivation | tremor                            |
| increased salivation | urinary incontinence              |
| increased salivation | keratitis                         |
| increased salivation | menorrhagia                       |
| increased salivation | personality disorder              |
| increased salivation | serotonin syndrome                |
| increased salivation | supraventricular extrasystoles    |
| increased salivation | urinary urgency                   |
| increased salivation | weight gain                       |
| increased salivation | somnolence                        |
| increased sweating   | paralysis                         |
| increased sweating   | shock                             |
| infection            | stomatitis                        |
| infection            | pancreatitis                      |
| infection            | peripheral neuropathy             |
| infection            | leukopenia                        |
| infection            | neutropenia                       |
| infection            | malaise                           |
| infection            | toxic epidermal necrolysis        |
| infection            | myalgia                           |
| infection            | ulcer                             |
| infection            | neuropathy                        |
| infection            | pneumonia                         |
| infection            | thrombocytopenia                  |
| Influenza            | conjunctivitis                    |
| Influenza            | epistaxis                         |
| Influenza            | upper respiratory tract infection |
| Influenza            | abdominal pain                    |
| insomnia             | nightmares                        |
| insomnia             | syncope                           |
| insomnia             | urinary retention                 |
| insomnia             | nervousness                       |
| insomnia             | psoriasis                         |
| insomnia             | tremor                            |
| insomnia             | paranoia                          |
| insomnia             | photophobia                       |
| insomnia             | ventricular tachycardia           |
| insomnia             | somnolence                        |
| insomnia             | palpitations                      |
| insomnia             | neurosis                          |
| insomnia             | sweating                          |
| insomnia             | torticollis                       |
| insomnia             | tachycardia                       |
| insomnia             | keratitis                         |
| insomnia             | menorrhagia                       |

|                        |                                |
|------------------------|--------------------------------|
| insomnia               | personality disorder           |
| insomnia               | psychosis                      |
| insomnia               | serotonin syndrome             |
| insomnia               | supraventricular extrasystoles |
| insomnia               | weight gain                    |
| insomnia               | priapism                       |
| insomnia               | urinary incontinence           |
| insomnia               | postural hypotension           |
| interstitial nephritis | rectal hemorrhage              |
| interstitial nephritis | melena                         |
| interstitial nephritis | toxic epidermal necrolysis     |
| interstitial nephritis | proteinuria                    |
| interstitial nephritis | peptic ulcer                   |
| interstitial nephritis | sepsis                         |
| interstitial nephritis | ulcer                          |
| interstitial nephritis | vasculitis                     |
| interstitial nephritis | pancreatitis                   |
| interstitial nephritis | pneumonia                      |
| interstitial nephritis | renal failure                  |
| interstitial nephritis | lymphadenopathy                |
| interstitial nephritis | stomatitis                     |
| interstitial nephritis | pancytopenia                   |
| interstitial nephritis | tinnitus                       |
| interstitial nephritis | jaundice                       |
| interstitial nephritis | photosensitivity               |
| interstitial nephritis | ulcerative stomatitis          |
| interstitial nephritis | thrombocytopenia               |
| ischemic colitis       | leukocytosis                   |
| ischemic colitis       | neuralgia                      |
| ischemic colitis       | skin ulcer                     |
| ischemic colitis       | suicide attempt                |
| jaundice               | toxic epidermal necrolysis     |
| jaundice               | photosensitivity               |
| jaundice               | rectal hemorrhage              |
| jaundice               | pancytopenia                   |
| jaundice               | purpura                        |
| jaundice               | pancreatitis                   |
| jaundice               | peptic ulcer                   |
| jaundice               | pruritus                       |
| keratitis              | serotonin syndrome             |
| keratitis              | supraventricular extrasystoles |
| keratitis              | paranoia                       |
| keratitis              | photophobia                    |
| keratitis              | ventricular tachycardia        |
| keratitis              | nervousness                    |
| keratitis              | psoriasis                      |
| keratitis              | sweating                       |
| keratitis              | torticollis                    |
| keratitis              | nightmares                     |
| keratitis              | priapism                       |
| keratitis              | syncope                        |
| keratitis              | somnolence                     |
| keratitis              | tardive dyskinesia             |
| keratitis              | urinary retention              |

|                                |                               |
|--------------------------------|-------------------------------|
| keratitis                      | palpitations                  |
| keratitis                      | paralytic ileus               |
| keratitis                      | nasal congestion              |
| labyrinthitis                  | pyelonephritis                |
| labyrinthitis                  | sneezing                      |
| labyrinthitis                  | stridor                       |
| labyrinthitis                  | urinary hesitancy             |
| labyrinthitis                  | ventricular extrasystoles     |
| labyrinthitis                  | voice alteration              |
| labyrinthitis                  | wheezing                      |
| lactic dehydrogenase increased | pyuria                        |
| laryngitis                     | urinary incontinence          |
| laryngitis                     | urinary frequency             |
| laryngitis                     | tachycardia                   |
| laryngitis                     | tremor                        |
| laryngitis                     | otitis media                  |
| laryngitis                     | phlebitis                     |
| laryngitis                     | pulmonary embolism            |
| laryngitis                     | sleep disorder                |
| laryngitis                     | liver function tests abnormal |
| laryngitis                     | migraine                      |
| laryngitis                     | thrombophlebitis              |
| laryngitis                     | somnolence                    |
| laryngitis                     | ventricular fibrillation      |
| leukocytosis                   | neuralgia                     |
| leukocytosis                   | skin ulcer                    |
| leukocytosis                   | suicide attempt               |
| leukopenia                     | stomatitis                    |
| leukopenia                     | neutropenia                   |
| leukopenia                     | peripheral neuropathy         |
| leukopenia                     | thrombocytopenia              |
| leukopenia                     | neuropathy                    |
| leukopenia                     | toxic epidermal necrolysis    |
| leukopenia                     | sepsis                        |
| leukopenia                     | pleural effusion              |
| leukopenia                     | pneumonia                     |
| leukopenia                     | renal failure                 |
| lightheadedness                | sore throat                   |
| lightheadedness                | mental depression             |
| lightheadedness                | nightmares                    |
| lightheadedness                | memory loss                   |
| lightheadedness                | psoriasis                     |
| lightheadedness                | spasm                         |
| lightheadedness                | sweating                      |
| lightheadedness                | weakness                      |
| lightheadedness                | priapism                      |
| liver function tests abnormal  | migraine                      |
| liver function tests abnormal  | otitis media                  |
| liver function tests abnormal  | phlebitis                     |
| liver function tests abnormal  | pulmonary embolism            |
| liver function tests abnormal  | lymphadenopathy               |
| liver function tests abnormal  | neurosis                      |
| liver function tests abnormal  | shock                         |
| liver function tests abnormal  | urinary incontinence          |

liver function tests abnormal

lupus

lymphadenopathy

malaise

malaise

malaise

melena

memory loss

memory loss

memory loss

menorrhagia

menorrhagia

menorrhagia

menorrhagia

menorrhagia

mental depression

migraine

migraine

migraine

migraine

migraine

migraine

migraine

urinary frequency

psychosis

tinnitus

rectal hemorrhage

migraine

otitis media

phlebitis

pulmonary embolism

tremor

toxic epidermal necrolysis

myocardial infarction

neurosis

peptic ulcer

stomatitis

toxic epidermal necrolysis

pancreatitis

myalgia

rectal hemorrhage

proteinuria

peptic ulcer

sepsis

toxic epidermal necrolysis

ulcer

vasculitis

pneumonia

renal failure

pancytopenia

pancreatitis

stomatitis

thrombocytopenia

sore throat

mental depression

nightmares

neurosis

nightmares

syncope

urinary incontinence

urinary retention

sore throat

nightmares

shortness of breath

nasal congestion

postural hypotension

psoriasis

spasm

sweating

weakness

otitis media

phlebitis

pulmonary embolism

neurosis

shock

urinary incontinence

urinary frequency



|                       |                                   |
|-----------------------|-----------------------------------|
| mouth ulceration      | petechiae                         |
| mouth ulceration      | swelling                          |
| muscle cramps         | rhinitis                          |
| muscle cramps         | upper respiratory tract infection |
| myalgia               | rash                              |
| myalgia               | thrombocytopenia                  |
| myocardial infarction | thrombophlebitis                  |
| myocardial infarction | pulmonary embolism                |
| nasal congestion      | postural hypotension              |
| nasal congestion      | tardive dyskinesia                |
| nasal congestion      | paralytic ileus                   |
| nasal congestion      | priapism                          |
| nasal congestion      | spasm                             |
| nasal congestion      | sweating                          |
| nasal congestion      | palpitations                      |
| nasal congestion      | torticollis                       |
| nasal congestion      | nightmares                        |
| nasal congestion      | paranoia                          |
| nasal congestion      | ventricular tachycardia           |
| nasal congestion      | tachycardia                       |
| nasal congestion      | urinary retention                 |
| nasal congestion      | psoriasis                         |
| nasal congestion      | personality disorder              |
| nasal congestion      | serotonin syndrome                |
| nasal congestion      | shortness of breath               |
| nasal congestion      | supraventricular extrasystoles    |
| nasal congestion      | weight gain                       |
| neck rigidity         | polyuria                          |
| neck rigidity         | tenesmus                          |
| neck rigidity         | vaginal hemorrhage                |
| neck rigidity         | vaginitis                         |
| nervousness           | syncope                           |
| nervousness           | urinary retention                 |
| nervousness           | photophobia                       |
| nervousness           | tremor                            |
| nervousness           | nightmares                        |
| nervousness           | somnolence                        |
| nervousness           | serotonin syndrome                |
| nervousness           | supraventricular extrasystoles    |
| nervousness           | paralysis                         |
| nervousness           | paranoia                          |
| nervousness           | ventricular tachycardia           |
| nervousness           | tachycardia                       |
| nervousness           | postural hypotension              |
| nervousness           | neurosis                          |
| nervousness           | psoriasis                         |
| nervousness           | sweating                          |
| neuralgia             | skin ulcer                        |
| neuralgia             | suicide attempt                   |
| neuropathy            | stomatitis                        |
| neuropathy            | neutropenia                       |
| neuropathy            | pleural effusion                  |
| neuropathy            | peripheral neuropathy             |
| neuropathy            | toxic epidermal necrolysis        |

|              |                                |
|--------------|--------------------------------|
| neuropathy   | sepsis                         |
| neuropathy   | thrombocytopenia               |
| neurosis     | tachycardia                    |
| neurosis     | tremor                         |
| neurosis     | nightmares                     |
| neurosis     | syncope                        |
| neurosis     | urinary incontinence           |
| neurosis     | somnolence                     |
| neurosis     | urinary frequency              |
| neurosis     | urinary retention              |
| neurosis     | weight gain                    |
| neurosis     | otitis media                   |
| neurosis     | paranoia                       |
| neurosis     | phlebitis                      |
| neurosis     | pulmonary embolism             |
| neurosis     | ventricular fibrillation       |
| neurosis     | ventricular tachycardia        |
| neurosis     | psoriasis                      |
| neurosis     | sweating                       |
| neutropenia  | stomatitis                     |
| neutropenia  | thrombocytopenia               |
| neutropenia  | pleural effusion               |
| neutropenia  | peripheral neuropathy          |
| nightmares   | urinary retention              |
| nightmares   | psoriasis                      |
| nightmares   | sweating                       |
| nightmares   | tachycardia                    |
| nightmares   | priapism                       |
| nightmares   | syncope                        |
| nightmares   | paranoia                       |
| nightmares   | sore throat                    |
| nightmares   | ventricular tachycardia        |
| nightmares   | tardive dyskinesia             |
| nightmares   | palpitations                   |
| nightmares   | paralytic ileus                |
| nightmares   | spasm                          |
| nightmares   | torticollis                    |
| nightmares   | postural hypotension           |
| nightmares   | tremor                         |
| nightmares   | urinary incontinence           |
| nightmares   | personality disorder           |
| nightmares   | serotonin syndrome             |
| nightmares   | supraventricular extrasystoles |
| nightmares   | weight gain                    |
| nightmares   | somnolence                     |
| nightmares   | photophobia                    |
| otitis media | phlebitis                      |
| otitis media | urinary incontinence           |
| otitis media | urinary frequency              |
| otitis media | tachycardia                    |
| otitis media | tremor                         |
| otitis media | pulmonary embolism             |
| otitis media | sleep disorder                 |
| otitis media | ventricular fibrillation       |

|                 |                                   |
|-----------------|-----------------------------------|
| otitis media    | tinnitus                          |
| otitis media    | shock                             |
| palpitations    | priapism                          |
| palpitations    | tardive dyskinesia                |
| palpitations    | spasm                             |
| palpitations    | sweating                          |
| palpitations    | postural hypotension              |
| palpitations    | paralytic ileus                   |
| palpitations    | torticollis                       |
| palpitations    | syncope                           |
| palpitations    | tachycardia                       |
| palpitations    | paranoia                          |
| palpitations    | ventricular tachycardia           |
| palpitations    | urinary retention                 |
| palpitations    | psoriasis                         |
| palpitations    | weakness                          |
| palpitations    | personality disorder              |
| palpitations    | serotonin syndrome                |
| palpitations    | supraventricular extrasystoles    |
| palpitations    | weight gain                       |
| palpitations    | tremor                            |
| pancreatitis    | toxic epidermal necrolysis        |
| pancreatitis    | stomatitis                        |
| pancreatitis    | pneumonia                         |
| pancreatitis    | rectal hemorrhage                 |
| pancreatitis    | purpura                           |
| pancreatitis    | proteinuria                       |
| pancreatitis    | vasculitis                        |
| pancreatitis    | pancytopenia                      |
| pancreatitis    | sepsis                            |
| pancreatitis    | upper respiratory tract infection |
| pancreatitis    | peptic ulcer                      |
| pancreatitis    | thrombocytopenia                  |
| pancreatitis    | photosensitivity                  |
| pancytopenia    | sepsis                            |
| pancytopenia    | peptic ulcer                      |
| pancytopenia    | pneumonia                         |
| pancytopenia    | rectal hemorrhage                 |
| pancytopenia    | proteinuria                       |
| pancytopenia    | ulcer                             |
| pancytopenia    | thrombocytopenia                  |
| pancytopenia    | pruritus                          |
| pancytopenia    | toxic epidermal necrolysis        |
| pancytopenia    | stomatitis                        |
| paralysis       | shock                             |
| paralysis       | syncope                           |
| paralytic ileus | tardive dyskinesia                |
| paralytic ileus | priapism                          |
| paralytic ileus | torticollis                       |
| paralytic ileus | tachycardia                       |
| paralytic ileus | urinary retention                 |
| paralytic ileus | spasm                             |
| paralytic ileus | sweating                          |
| paralytic ileus | postural hypotension              |

|                 |                                |
|-----------------|--------------------------------|
| paralytic ileus | paranoia                       |
| paralytic ileus | ventricular tachycardia        |
| paralytic ileus | psoriasis                      |
| paralytic ileus | personality disorder           |
| paralytic ileus | serotonin syndrome             |
| paralytic ileus | supraventricular extrasystoles |
| paralytic ileus | urinary urgency                |
| paralytic ileus | weight gain                    |
| paralytic ileus | syncope                        |
| paranoia        | ventricular tachycardia        |
| paranoia        | psoriasis                      |
| paranoia        | sweating                       |
| paranoia        | torticollis                    |
| paranoia        | priapism                       |
| paranoia        | syncope                        |
| paranoia        | somnolence                     |
| paranoia        | tardive dyskinesia             |
| paranoia        | urinary retention              |
| paranoia        | personality disorder           |
| paranoia        | serotonin syndrome             |
| paranoia        | supraventricular extrasystoles |
| paranoia        | weight gain                    |
| paranoia        | tachycardia                    |
| paranoia        | postural hypotension           |
| paranoia        | tremor                         |
| paranoia        | photophobia                    |
| paranoia        | seizures                       |
| paranoia        | spasm                          |
| paranoia        | urinary incontinence           |
| paresthesia     | tinnitus                       |
| paresthesia     | photosensitivity               |
| paresthesia     | syncope                        |
| paresthesia     | urinary frequency              |
| Parkinson       | increased salivation           |
| Parkinson       | tardive dyskinesia             |
| Parkinson       | paralytic ileus                |
| Parkinson       | galactorrhea                   |
| Parkinson       | priapism                       |
| Parkinson       | tachycardia                    |
| Parkinson       | urinary retention              |
| Parkinson       | dyskinesia                     |
| Parkinson       | torticollis                    |
| Parkinson       | dry mouth                      |
| Parkinson       | nightmares                     |
| Parkinson       | impotence                      |
| Parkinson       | nasal congestion               |
| Parkinson       | spasm                          |
| Parkinson       | sweating                       |
| Parkinson       | palpitations                   |
| Parkinson       | gynecomastia                   |
| Parkinson       | heart block                    |
| Parkinson       | glycosuria                     |
| Parkinson       | syncope                        |
| Parkinson       | amenorrhea                     |

|                       |                                |
|-----------------------|--------------------------------|
| Parkinson             | grand mal                      |
| Parkinson             | paranoia                       |
| Parkinson             | ventricular tachycardia        |
| Parkinson             | postural hypotension           |
| Parkinson             | bradycardia                    |
| Parkinson             | constipation                   |
| Parkinson             | hypotension                    |
| Parkinson             | insomnia                       |
| Parkinson             | nervousness                    |
| Parkinson             | neurosis                       |
| Parkinson             | psoriasis                      |
| Parkinson             | delirium                       |
| Parkinson             | abnormal gait                  |
| Parkinson             | abnormal vision                |
| Parkinson             | alkaline phosphatase increased |
| Parkinson             | blepharitis                    |
| Parkinson             | blurred vision                 |
| Parkinson             | cold extremities               |
| Parkinson             | dysmenorrhea                   |
| Parkinson             | dysphagia                      |
| Parkinson             | goiter                         |
| Parkinson             | hypothyroidism                 |
| Parkinson             | keratitis                      |
| Parkinson             | menorrhagia                    |
| Parkinson             | personality disorder           |
| Parkinson             | serotonin syndrome             |
| Parkinson             | supraventricular extrasystoles |
| Parkinson             | urinary urgency                |
| Parkinson             | weight gain                    |
| Parkinson             | hallucinations                 |
| Parkinson             | urinary incontinence           |
| Parkinson             | tremor                         |
| peptic ulcer          | rectal hemorrhage              |
| peptic ulcer          | proteinuria                    |
| peptic ulcer          | sepsis                         |
| peptic ulcer          | toxic epidermal necrolysis     |
| peptic ulcer          | ulcer                          |
| peptic ulcer          | vasculitis                     |
| peptic ulcer          | pneumonia                      |
| peptic ulcer          | renal failure                  |
| peptic ulcer          | pruritus                       |
| peptic ulcer          | stomatitis                     |
| peripheral edema      | weight loss                    |
| peripheral neuropathy | stomatitis                     |
| peripheral neuropathy | toxic epidermal necrolysis     |
| peripheral neuropathy | sepsis                         |
| peripheral neuropathy | thrombocytopenia               |
| peripheral neuropathy | pleural effusion               |
| peripheral neuropathy | pneumonia                      |
| personality disorder  | ventricular tachycardia        |
| personality disorder  | psoriasis                      |
| personality disorder  | seizures                       |
| personality disorder  | spasm                          |
| personality disorder  | sweating                       |

|                      |                                   |
|----------------------|-----------------------------------|
| personality disorder | torticollis                       |
| personality disorder | priapism                          |
| personality disorder | syncope                           |
| personality disorder | urinary incontinence              |
| personality disorder | somnolence                        |
| personality disorder | tardive dyskinesia                |
| personality disorder | urinary retention                 |
| petechiae            | swelling                          |
| Pharyngitis          | upper respiratory tract infection |
| Pharyngitis          | Sinusitis                         |
| Pharyngitis          | fever                             |
| Pharyngitis          | abdominal pain                    |
| Pharyngitis          | bronchitis                        |
| phlebitis            | urinary incontinence              |
| phlebitis            | urinary frequency                 |
| phlebitis            | tachycardia                       |
| phlebitis            | tremor                            |
| phlebitis            | pulmonary embolism                |
| phlebitis            | sleep disorder                    |
| phlebitis            | ventricular fibrillation          |
| phlebitis            | tinnitus                          |
| phlebitis            | shock                             |
| photophobia          | syncope                           |
| photophobia          | somnolence                        |
| photophobia          | urinary retention                 |
| photophobia          | serotonin syndrome                |
| photophobia          | supraventricular extrasystoles    |
| photophobia          | postural hypotension              |
| photophobia          | tremor                            |
| photophobia          | ventricular tachycardia           |
| photophobia          | psoriasis                         |
| photophobia          | sweating                          |
| photophobia          | torticollis                       |
| photophobia          | priapism                          |
| photosensitivity     | purpura                           |
| photosensitivity     | tinnitus                          |
| photosensitivity     | vertigo                           |
| photosensitivity     | rectal hemorrhage                 |
| photosensitivity     | toxic epidermal necrolysis        |
| photosensitivity     | vasculitis                        |
| photosensitivity     | rhinitis                          |
| photosensitivity     | renal failure                     |
| photosensitivity     | thrombocytopenia                  |
| pleural effusion     | toxic epidermal necrolysis        |
| pleural effusion     | stomatitis                        |
| pleural effusion     | sepsis                            |
| pleural effusion     | pulmonary edema                   |
| pneumonia            | toxic epidermal necrolysis        |
| pneumonia            | sepsis                            |
| pneumonia            | proteinuria                       |
| pneumonia            | ulcer                             |
| pneumonia            | thrombocytopenia                  |
| pneumonia            | rectal hemorrhage                 |
| pneumonia            | vasculitis                        |

|                      |                                   |
|----------------------|-----------------------------------|
| pneumonia            | pruritus                          |
| pneumonia            | renal failure                     |
| pneumonia            | upper respiratory tract infection |
| pneumonia            | stomatitis                        |
| polyuria             | tenesmus                          |
| polyuria             | vaginal hemorrhage                |
| polyuria             | vaginitis                         |
| postural hypotension | priapism                          |
| postural hypotension | syncope                           |
| postural hypotension | spasm                             |
| postural hypotension | sweating                          |
| postural hypotension | tardive dyskinesia                |
| postural hypotension | urinary retention                 |
| postural hypotension | torticollis                       |
| postural hypotension | ventricular tachycardia           |
| postural hypotension | tachycardia                       |
| postural hypotension | somnolence                        |
| postural hypotension | psoriasis                         |
| postural hypotension | weakness                          |
| priapism             | tardive dyskinesia                |
| priapism             | torticollis                       |
| priapism             | tachycardia                       |
| priapism             | urinary retention                 |
| priapism             | spasm                             |
| priapism             | sweating                          |
| priapism             | ventricular tachycardia           |
| priapism             | psoriasis                         |
| priapism             | syncope                           |
| priapism             | serotonin syndrome                |
| priapism             | supraventricular extrasystoles    |
| priapism             | urinary urgency                   |
| priapism             | weight gain                       |
| priapism             | somnolence                        |
| priapism             | sore throat                       |
| proteinuria          | rectal hemorrhage                 |
| proteinuria          | toxic epidermal necrolysis        |
| proteinuria          | sepsis                            |
| proteinuria          | ulcer                             |
| proteinuria          | vasculitis                        |
| proteinuria          | renal failure                     |
| proteinuria          | pulmonary edema                   |
| pruritus             | thrombocytopenia                  |
| pruritus             | ulcer                             |
| pruritus             | vasculitis                        |
| pruritus             | renal failure                     |
| pruritus             | sepsis                            |
| pruritus             | toxic epidermal necrolysis        |
| psoriasis            | ventricular tachycardia           |
| psoriasis            | sweating                          |
| psoriasis            | torticollis                       |
| psoriasis            | syncope                           |
| psoriasis            | somnolence                        |
| psoriasis            | tardive dyskinesia                |
| psoriasis            | urinary retention                 |

|                    |                                |
|--------------------|--------------------------------|
| psoriasis          | serotonin syndrome             |
| psoriasis          | supraventricular extrasystoles |
| psoriasis          | weight gain                    |
| psoriasis          | sore throat                    |
| psoriasis          | tachycardia                    |
| psoriasis          | tremor                         |
| psoriasis          | seizures                       |
| psoriasis          | spasm                          |
| psychosis          | syncope                        |
| psychosis          | somnolence                     |
| psychosis          | urinary retention              |
| pulmonary edema    | toxic epidermal necrolysis     |
| pulmonary edema    | renal failure                  |
| pulmonary embolism | urinary frequency              |
| pulmonary embolism | thrombophlebitis               |
| pulmonary embolism | shock                          |
| pulmonary embolism | urinary incontinence           |
| purpura            | vertigo                        |
| pyelonephritis     | sneezing                       |
| pyelonephritis     | stridor                        |
| pyelonephritis     | urinary hesitancy              |
| pyelonephritis     | ventricular extrasystoles      |
| pyelonephritis     | voice alteration               |
| pyelonephritis     | wheezing                       |
| rectal hemorrhage  | toxic epidermal necrolysis     |
| rectal hemorrhage  | sepsis                         |
| rectal hemorrhage  | ulcer                          |
| rectal hemorrhage  | vasculitis                     |
| rectal hemorrhage  | renal failure                  |
| rectal hemorrhage  | stomatitis                     |
| rectal hemorrhage  | tinnitus                       |
| rectal hemorrhage  | ulcerative stomatitis          |
| rectal hemorrhage  | thrombocytopenia               |
| renal failure      | thrombocytopenia               |
| renal failure      | vasculitis                     |
| renal failure      | toxic epidermal necrolysis     |
| renal failure      | sepsis                         |
| renal failure      | ulcer                          |
| renal failure      | stomatitis                     |
| renal failure      | tinnitus                       |
| renal failure      | vertigo                        |
| seizures           | ventricular tachycardia        |
| seizures           | spasm                          |
| seizures           | sweating                       |
| sepsis             | toxic epidermal necrolysis     |
| sepsis             | stomatitis                     |
| sepsis             | ulcer                          |
| sepsis             | thrombocytopenia               |
| sepsis             | vasculitis                     |
| serotonin syndrome | supraventricular extrasystoles |
| serotonin syndrome | ventricular tachycardia        |
| serotonin syndrome | sweating                       |
| serotonin syndrome | torticollis                    |
| serotonin syndrome | syncope                        |



|                    |                                   |
|--------------------|-----------------------------------|
| serotonin syndrome | somnolence                        |
| serotonin syndrome | tardive dyskinesia                |
| serotonin syndrome | urinary retention                 |
| SGOT increased     | interstitial pneumonitis          |
| SIADH              | hallucinations                    |
| SIADH              | urinary incontinence              |
| SIADH              | confusion                         |
| SIADH              | ataxia                            |
| SIADH              | tachycardia                       |
| SIADH              | breast pain                       |
| SIADH              | hypoxia                           |
| SIADH              | tremor                            |
| SIADH              | laryngitis                        |
| SIADH              | coma                              |
| SIADH              | urinary frequency                 |
| SIADH              | otitis media                      |
| SIADH              | phlebitis                         |
| SIADH              | sleep disorder                    |
| SIADH              | ventricular fibrillation          |
| SIADH              | eructation                        |
| SIADH              | hypotension                       |
| SIADH              | amnesia                           |
| SIADH              | hiccup                            |
| SIADH              | neurosis                          |
| SIADH              | albuminuria                       |
| SIADH              | delirium                          |
| SIADH              | glossitis                         |
| SIADH              | diplopia                          |
| SIADH              | herpes simplex                    |
| SIADH              | somnolence                        |
| SIADH              | hypothyroidism                    |
| SIADH              | liver function tests abnormal     |
| SIADH              | menorrhagia                       |
| SIADH              | migraine                          |
| SIADH              | breast enlargement                |
| SIADH              | pulmonary embolism                |
| Sinusitis          | upper respiratory tract infection |
| Sinusitis          | conjunctivitis                    |
| Sinusitis          | bronchitis                        |
| Sinusitis          | abdominal pain                    |
| Sinusitis          | fever                             |
| skin ulcer         | suicide attempt                   |
| sleep disorder     | urinary incontinence              |
| sleep disorder     | urinary frequency                 |
| sleep disorder     | tachycardia                       |
| sleep disorder     | tremor                            |
| sleep disorder     | ventricular fibrillation          |
| sneezing           | stridor                           |
| sneezing           | urinary hesitancy                 |
| sneezing           | ventricular extrasystoles         |
| sneezing           | voice alteration                  |
| sneezing           | wheezing                          |
| somnolence         | tremor                            |
| somnolence         | tachycardia                       |

|                            |                                |
|----------------------------|--------------------------------|
| somnolence                 | syncope                        |
| somnolence                 | urinary incontinence           |
| somnolence                 | ventricular tachycardia        |
| somnolence                 | urinary retention              |
| somnolence                 | sweating                       |
| somnolence                 | torticollis                    |
| somnolence                 | supraventricular extrasystoles |
| somnolence                 | weight gain                    |
| somnolence                 | tardive dyskinesia             |
| somnolence                 | urinary frequency              |
| sore throat                | spasm                          |
| sore throat                | sweating                       |
| sore throat                | weakness                       |
| spasm                      | tardive dyskinesia             |
| spasm                      | tachycardia                    |
| spasm                      | sweating                       |
| spasm                      | torticollis                    |
| spasm                      | urinary retention              |
| spasm                      | ventricular tachycardia        |
| spasm                      | weakness                       |
| Stevens - Johnson syndrome | erythema multiforme            |
| Stevens - Johnson syndrome | toxic epidermal necrolysis     |
| Stevens - Johnson syndrome | hemolytic anemia               |
| Stevens - Johnson syndrome | hematemesis                    |
| Stevens - Johnson syndrome | interstitial nephritis         |
| Stevens - Johnson syndrome | rectal hemorrhage              |
| Stevens - Johnson syndrome | renal failure                  |
| Stevens - Johnson syndrome | exfoliative dermatitis         |
| Stevens - Johnson syndrome | vasculitis                     |
| Stevens - Johnson syndrome | gastrointestinal hemorrhage    |
| Stevens - Johnson syndrome | aplastic anemia                |
| Stevens - Johnson syndrome | hearing loss                   |
| Stevens - Johnson syndrome | melen                          |
| Stevens - Johnson syndrome | gastritis                      |
| Stevens - Johnson syndrome | colitis                        |
| Stevens - Johnson syndrome | ecchymosis                     |
| Stevens - Johnson syndrome | cystitis                       |
| Stevens - Johnson syndrome | peptic ulcer                   |
| Stevens - Johnson syndrome | sepsis                         |
| Stevens - Johnson syndrome | hepatic failure                |
| Stevens - Johnson syndrome | proteinuria                    |
| Stevens - Johnson syndrome | pancreatitis                   |
| Stevens - Johnson syndrome | alopecia                       |
| Stevens - Johnson syndrome | eructation                     |
| Stevens - Johnson syndrome | tinnitus                       |
| Stevens - Johnson syndrome | congestive heart failure       |
| Stevens - Johnson syndrome | thrombocytopenia               |
| Stevens - Johnson syndrome | stomatitis                     |
| Stevens - Johnson syndrome | angioedema                     |
| Stevens - Johnson syndrome | photosensitivity               |
| Stevens - Johnson syndrome | pulmonary edema                |
| Stevens - Johnson syndrome | asthenia                       |
| Stevens - Johnson syndrome | hematuria                      |
| Stevens - Johnson syndrome | dysuria                        |

|                                |                            |
|--------------------------------|----------------------------|
| Stevens - Johnson syndrome     | flatulence                 |
| Stevens - Johnson syndrome     | herpes simplex             |
| Stevens - Johnson syndrome     | ulcer                      |
| Stevens - Johnson syndrome     | peripheral neuropathy      |
| Stevens - Johnson syndrome     | agranulocytosis            |
| Stevens - Johnson syndrome     | dry skin                   |
| Stevens - Johnson syndrome     | esophagitis                |
| Stevens - Johnson syndrome     | lymphadenopathy            |
| Stevens - Johnson syndrome     | hepatitis                  |
| Stevens - Johnson syndrome     | jaundice                   |
| Stevens - Johnson syndrome     | constipation               |
| Stevens - Johnson syndrome     | leukopenia                 |
| stomatitis                     | toxic epidermal necrolysis |
| stomatitis                     | thrombocytopenia           |
| stomatitis                     | weight loss                |
| stridor                        | urinary hesitancy          |
| stridor                        | ventricular extrasystoles  |
| stridor                        | voice alteration           |
| stridor                        | wheezing                   |
| supraventricular extrasystoles | ventricular tachycardia    |
| supraventricular extrasystoles | sweating                   |
| supraventricular extrasystoles | torticollis                |
| supraventricular extrasystoles | syncope                    |
| supraventricular extrasystoles | tardive dyskinesia         |
| supraventricular extrasystoles | urinary retention          |
| sweating                       | tardive dyskinesia         |
| sweating                       | urinary retention          |
| sweating                       | ventricular tachycardia    |
| sweating                       | tachycardia                |
| sweating                       | torticollis                |
| sweating                       | syncope                    |
| sweating                       | weight gain                |
| sweating                       | tremor                     |
| sweating                       | weakness                   |
| syncope                        | urinary retention          |
| syncope                        | tremor                     |
| syncope                        | ventricular tachycardia    |
| syncope                        | tachycardia                |
| syncope                        | torticollis                |
| syncope                        | urinary incontinence       |
| syncope                        | weight gain                |
| syncope                        | tardive dyskinesia         |
| syncope                        | urinary frequency          |
| tachycardia                    | urinary incontinence       |
| tachycardia                    | tardive dyskinesia         |
| tachycardia                    | urinary retention          |
| tachycardia                    | torticollis                |
| tachycardia                    | tremor                     |
| tachycardia                    | urinary frequency          |
| tachycardia                    | ventricular fibrillation   |
| tachycardia                    | ventricular tachycardia    |
| tardive dyskinesia             | torticollis                |
| tardive dyskinesia             | urinary retention          |
| tardive dyskinesia             | ventricular tachycardia    |

|                            |                            |
|----------------------------|----------------------------|
| tardive dyskinesia         | urinary urgency            |
| tardive dyskinesia         | weight gain                |
| tenesmus                   | vaginal hemorrhage         |
| tenesmus                   | vaginitis                  |
| thrombocytopenia           | toxic epidermal necrolysis |
| thrombocytopenia           | vasculitis                 |
| thrombocytopenia           | ulcer                      |
| thrombophlebitis           | urinary frequency          |
| tinnitus                   | urinary frequency          |
| tinnitus                   | vasculitis                 |
| Toothache                  | abuse                      |
| Toothache                  | drug dependence            |
| Toothache                  | fecal impaction            |
| Toothache                  | glaucoma                   |
| Toothache                  | hyperacusis                |
| Toothache                  | hypothermia                |
| Toothache                  | hypoventilation            |
| Toothache                  | labyrinthitis              |
| Toothache                  | pyelonephritis             |
| Toothache                  | sneezing                   |
| Toothache                  | stridor                    |
| Toothache                  | urinary hesitancy          |
| Toothache                  | ventricular extrasystoles  |
| Toothache                  | voice alteration           |
| Toothache                  | wheezing                   |
| torticollis                | urinary retention          |
| torticollis                | ventricular tachycardia    |
| torticollis                | urinary urgency            |
| torticollis                | weight gain                |
| toxic epidermal necrolysis | ulcer                      |
| toxic epidermal necrolysis | vasculitis                 |
| tremor                     | urinary incontinence       |
| tremor                     | urinary frequency          |
| tremor                     | urinary retention          |
| tremor                     | ventricular fibrillation   |
| tremor                     | ventricular tachycardia    |
| ulcer                      | vasculitis                 |
| urinary frequency          | urinary incontinence       |
| urinary hesitancy          | ventricular extrasystoles  |
| urinary hesitancy          | voice alteration           |
| urinary hesitancy          | wheezing                   |
| urinary incontinence       | ventricular fibrillation   |
| urinary incontinence       | urinary retention          |
| urinary incontinence       | ventricular tachycardia    |
| urinary retention          | ventricular tachycardia    |
| urinary retention          | urinary urgency            |
| vaginal hemorrhage         | weight gain                |
| Vascular Disorders         | vaginitis                  |
| Vascular Disorders         | constitutional symptoms    |
| Vascular Disorders         | hemorrhage                 |
| Vascular Disorders         | flushing                   |
| vasculitis                 | peripheral edema           |
| ventricular extrasystoles  | vertigo                    |
|                            | voice alteration           |

ventricular extrasystoles  
ventricular tachycardia  
voice alteration

wheezing  
weight gain  
wheezing

Table S1. All cliques in the ADR-ADR network

| Clique ID | ADR                      | ADR                      | ADR                     | ADR                  | ADR                               | ADR                               |
|-----------|--------------------------|--------------------------|-------------------------|----------------------|-----------------------------------|-----------------------------------|
| 1         | alopecia                 | hypersensitivity         | infection               | fever                | stomatitis                        | anorexia                          |
| 2         | alopecia                 | infection                | pancreatitis            | fever                | stomatitis                        | anorexia                          |
| 3         | delirium                 | hallucinations           | tachycardia             | urinary incontinence | SIADH                             | breast enlargement                |
| 4         | galactorrhea             | delirium                 | hallucinations          | tachycardia          | urinary incontinence              | breast enlargement                |
| 5         | cold extremities         | fatigue                  | nightmares              | syncope              | weight gain                       | constipation                      |
| 6         | abdominal pain           | alopecia                 | hypersensitivity        | infection            | anorexia                          | dermatitis                        |
| 7         | abdominal pain           | alopecia                 | infection               | pancreatitis         | anorexia                          | dermatitis                        |
| 8         | abdominal pain           | alopecia                 | hypersensitivity        | infection            | myalgia                           | dermatitis                        |
| 9         | infection                | congestive heart failure | hematuria               | anorexia             | dyspnea                           | edema                             |
| 10        | exfoliative dermatitis   | esophagitis              | jaundice                | peptic ulcer         | pancytopenia                      | eosinophilia                      |
| 11        | esophagitis              | jaundice                 | peptic ulcer            | pruritus             | pancytopenia                      | eosinophilia                      |
| 12        | congestive heart failure | stomatitis               | constitutional symptoms | hemorrhage           | anemia                            | erythema                          |
| 13        | abdominal pain           | conjunctivitis           | epistaxis               | pancreatitis         | upper respiratory tract infection | fever                             |
| 14        | alopecia                 | angioedema               | hepatitis               | vasculitis           | vertigo                           | hematuria                         |
| 15        | angioedema               | hepatitis                | vasculitis              | vertigo              | hematuria                         | hemolytic anemia                  |
| 16        | angioedema               | hepatitis                | photosensitivity        | vasculitis           | vertigo                           | hemolytic anemia                  |
| 17        | angioedema               | exfoliative dermatitis   | flatulence              | photosensitivity     | purpura                           | jaundice                          |
| 18        | angioedema               | exfoliative dermatitis   | pancreatitis            | photosensitivity     | purpura                           | jaundice                          |
| 19        | abdominal pain           | conjunctivitis           | epistaxis               | hepatitis            | upper respiratory tract infection | muscle cramps                     |
| 20        | Dyspepsia                | gastroenteritis          | hepatitis               | hyperkalemia         | pneumonia                         | proteinuria                       |
| 21        | Dyspepsia                | angioedema               | exfoliative dermatitis  | flatulence           | photosensitivity                  | purpura                           |
| 22        | Dyspepsia                | angioedema               | exfoliative dermatitis  | pancreatitis         | photosensitivity                  | purpura                           |
| 23        | impotence                | palpitations             | postural hypotension    | sweating             | weakness                          | spasm                             |
| 24        | lightheadedness          | mental depression        | sore throat             | sweating             | weakness                          | spasm                             |
| 25        | Dyspepsia                | alopecia                 | anaphylaxis             | malaise              | pancreatitis                      | toxic epidermal necrolysis        |
| 26        | Dyspepsia                | gastroenteritis          | pneumonia               | proteinuria          | toxic epidermal necrolysis        | ulcer                             |
| 27        | Dyspepsia                | Influenza                | abdominal pain          | conjunctivitis       | epistaxis                         | upper respiratory tract infection |
| 28        | Dyspepsia                | hepatitis                | hyperkalemia            | pneumonia            | proteinuria                       | vasculitis                        |
| 29        | AV block                 | impotence                | palpitations            | postural hypotension | sweating                          | weakness                          |
| 30        | AV block                 | lightheadedness          | mental depression       | sore throat          | sweating                          | weakness                          |
